# Supplementary material
Source: Elsevier journal article supplement (https://www.sciencedirect.com/science/article/pii/S0048969722048379)

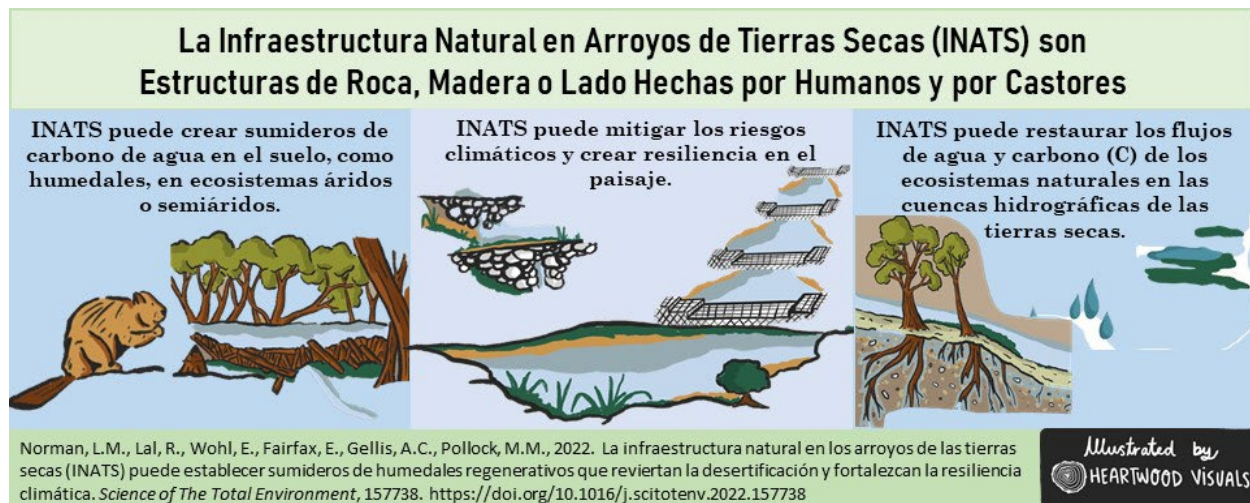

## **La Infraestructura Natural en Arroyos de Tierras Áridas (INATS) puede establecer sumideros de humedales regenerativos que revertan la desertificación y fortalezcan la resiliencia climática**

Laura M. Norman<sup>1</sup>, Rattan Lal<sup>2</sup>, Ellen Wohl<sup>3</sup>, Emily Fairfax<sup>4</sup>, Allen C. Gellis<sup>5</sup> y Michael M. Pollock<sup>6</sup>

### **Resumen**

En este artículo describimos los ciclos hidrogeomorfológicos y biogeoquímicos naturales de los ecosistemas fluviales de tierras secas que los hacen únicos, pero vulnerables a las actividades de uso de la tierra y al cambio climático. Presentamos Infraestructura Natural en Arroyos de Tierras Áridas (INATS), que son estructuras creadas de forma natural o antropogénica a partir de tierra, madera, escombros o rocas que pueden restaurar la función implícita de estos sistemas. Este manuscrito analiza más a fondo la capacidad y las similitudes funcionales entre las presas de castores y el INATS antropogénico, documentado por décadas de estudio científico. Además, presentamos el hallazgo novedoso, basado en la evidencia, de que el INATS puede crear humedales en zonas ribereñas con escasez de agua, con reservas de carbono orgánico del suelo de hasta 200 a 1400 Mg C/ha en el metro superior del suelo. Identificamos la acción restauradora clave de INATS, que es ralentizar el drenaje de agua del paisaje de modo que una mayor cantidad pueda infiltrarse y usarse para facilitar los procesos físicos, químicos y biológicos naturales en ambientes fluviales. Específicamente, afirmamos que el rápido drenaje de agua de tales entornos puede revertirse mediante la restauración de la infraestructura natural que alguna vez existió. Luego exploramos cómo se puede usar INATS para restaurar los bucles de retroalimentación biogeoquímicos naturales en estos sistemas. Brindamos ejemplos de cómo se

<sup>1</sup>Servicio Geológico de EE. UU., Centro de Ciencias Geográficas Occidentales, Tucson, AZ 85719, EE. UU.

<sup>2</sup>Universidad Estatal de Ohio, CFAES Rattan Lal Center for Carbon Management and Sequestration, Columbus, OH 43210, EE. UU.

<sup>3</sup> Universidad Estatal de Colorado, Departamento de Geociencias, Warner College of Natural Resources, Ft Collins, CO 80523, EE. UU.

<sup>4</sup> Universidad Estatal de California Islas del Canal, Departamento de Ciencias Ambientales y Gestión de la Investigación, Camarillo, CA 93012, EE. UU.

<sup>5</sup>Servicio Geológico de EE. UU., Centro de Ciencias del Agua de Maryland-Delaware-DC, Baltimore, MD 21228, EE. UU.

<sup>6</sup>NOAA Fisheries-Northwest Fisheries Science Center, Watershed Program, Seattle, WA 98112, EE. UU.

han utilizado los INATS para restaurar dichos circuitos de retroalimentación, las lecciones aprendidas de la investigación científica y la replicación en el suroeste de los Estados Unidos, cómo se pueden ampliar dichos esfuerzos y cuáles son las implicaciones para mitigar los efectos del cambio climático. Nuestra síntesis describe cómo la restauración mediante INATS puede respaldar la adaptación y la protección frente a perturbaciones y factores estresantes relacionados con el clima, como sequías, escasez de agua, inundaciones, olas de calor, tormentas de polvo, incendios forestales, pérdidas de biodiversidad e inseguridad alimentaria.

### Palabras clave

Basadas en la naturaleza, servicios ecosistémicos, secuestro de carbono, análogos de diques de castores, estructuras de detención de rocas

### Puntos Importantes

- La infraestructura natural en los arroyos de tierras secas (INATS) almacena agua, sedimentos y carbono.
- INATS puede ser instalado tanto por castores *como por* humanos, usando roca, madera y lado.
- INATS puede crear o restaurar humedales ribereños en cuencas degradadas e incisas.
- INATS sustentan procesos y funciones que impulsan la resiliencia de los ecosistemas fluviales.
- INATS inicia ciclos de retroalimentación positiva que mitigan el cambio climático.

## 1.0. Introducción

El estudio de la ecohidrología en ambientes áridos y semiáridos (colectivamente, 'tierras secas') puede ofrecer soluciones para vastas áreas del planeta donde se está produciendo o se espera que se produzca la aridización. Las tierras áridas constituyen la mayor bioma terrestre en la Tierra y son el hogar de más del 20% de la población mundial (Tchakerian y Pease, 2015). En los Estados Unidos, aproximadamente el 25% de la tierra se considera árida o semiárida (áreas que promedian anualmente < 25 cm y 25-50 cm de lluvia, respectivamente) (Agha Kouchak et al., 2013). La desertificación ocurre cuando la disponibilidad de agua disminuye y provoca la degradación del suelo y la vegetación (Lal, 2010; Lal et al., 2003). Los cambios en el uso de la tierra y el aumento de las emisiones de gases de efecto invernadero (GEI) durante el último siglo han aumentado la aridificación en el suroeste de los Estados Unidos (Overpeck y Udall, 2020; Figura 4). Las precipitaciones altamente variables y las condiciones cálidas y secas prolongadas pueden provocar sequías, inundaciones e incendios impredecibles, agotamiento de las aguas superficiales y subterráneas, degradación de los suelos y cambios en la vegetación (Allen et al., 2010; Breshears et al., 2005; East and Sankey, 2020; Goodrich et al., 2004; Uhlman et al., 2020). La severidad y frecuencia de tales eventos son controladas en gran medida por los flujos de agua y carbono (C) (Sahani et al., 2019).

A medida que aumentan las temperaturas y la humedad, se forman nubes en la parte superior de la atmósfera (Dessler, 2010). Los cambios en el ciclo del agua y, en particular, en los bucles de retroalimentación de la evapotranspiración y el vapor de agua pueden causar un aumento frecuencia e intensidad de tormenta extrema eventos, inundaciones, y sequías (Huntington, 2006). El vapor de agua también atrapa una parte de la radiación infrarroja saliente de la Tierra y lo vuelve a irradiar, aumentando efectos de calentamiento. El vapor de agua es el principal GEI de la Tierra (Graham et al., 2010), pero la atmósfera el dióxido de carbono (CO<sub>2</sub>) es el GEI más importante relacionado con los impactos antropogénicos (Riebeek, 2011). Contabilizar y minimizar el CO<sub>2</sub> antropogénico mientras se maximiza el sumidero de carbono de la biosfera puede reducir el calentamiento global (Convención Marco de las Naciones Unidas sobre el Cambio Climático—UNFCCC, 2015). Las emisiones de carbono actualmente superan el secuestro, pero muchos ecosistemas tienen retroalimentaciones que pueden limitar el CO<sub>2</sub> atmosférico al secuestrar más carbono del que emiten (Lal, 2019a).

La 26.<sup>a</sup> Conferencia de las Partes sobre el Cambio Climático de las Naciones Unidas (COP26) destacó el potencial de las "soluciones basadas en la naturaleza" para abordar las crisis interrelacionadas del cambio climático y los impactos en la biodiversidad (Departamento del Interior de EE. UU., 2021). Debido a este impulso político internacional en torno a las soluciones basadas en la naturaleza, existe la necesidad de estudios de casos que describan con más detalle los servicios de mitigación y adaptación climática que brindan (Tye et al., 2022). La infraestructura natural se basa en la naturaleza soluciones que utilizan o imitan procesos naturales y pueden contribuir a conservar, rehabilitar o crear ecosistemas importantes y mitigar los GEI (Nesshöver et al., 2017; WWAP, 2018). La infraestructura basada en la naturaleza cuesta menos que la infraestructura construida, es más barata de mantener y más resistente al cambio climático (Instituto Internacional para el Desarrollo Sostenible, 2021).

La infraestructura natural, como las presas de castores, los atascos de troncos y las características geológicas, y la infraestructura creada por el hombre, como las presas de control de roca, los

análogos de presas de castores (APC), gaviones y presas, afectan la hidráulica y la sedimentación del flujo de la corriente y pueden mejorar el establecimiento de plantas ribereñas (DeBano y Heede, 1987; Gurnell, 1998). Nos referimos a estructuras naturales y antropogénicas como infraestructura natural en arroyos de tierras secas (INATS) y describimos cómo pueden restaurar los procesos hidrogeomorfológicos y biogeoquímicos en las cuencas hidrográficas (Figura 1). Específicamente, nuestros objetivos son (i) describir los diferentes tipos de INATS y explicar los bucles de retroalimentación hidrológica, geomórfica, pedagógica y biológica que inician, (ii) describir cómo se puede usar INATS para perpetuar corrientes efímeras, y (iii) describir cómo se puede usar INATS utilizado para secuestrar carbono.

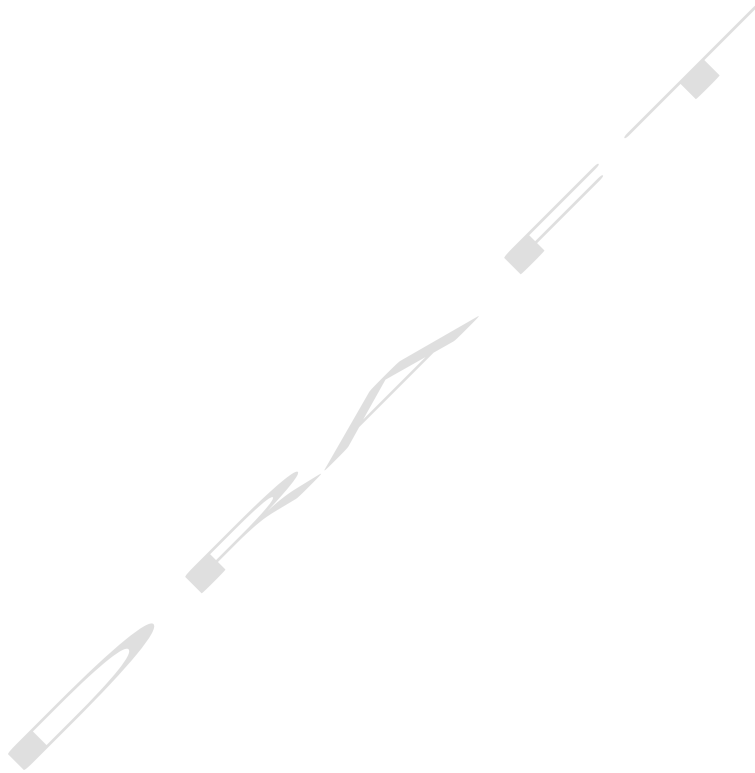



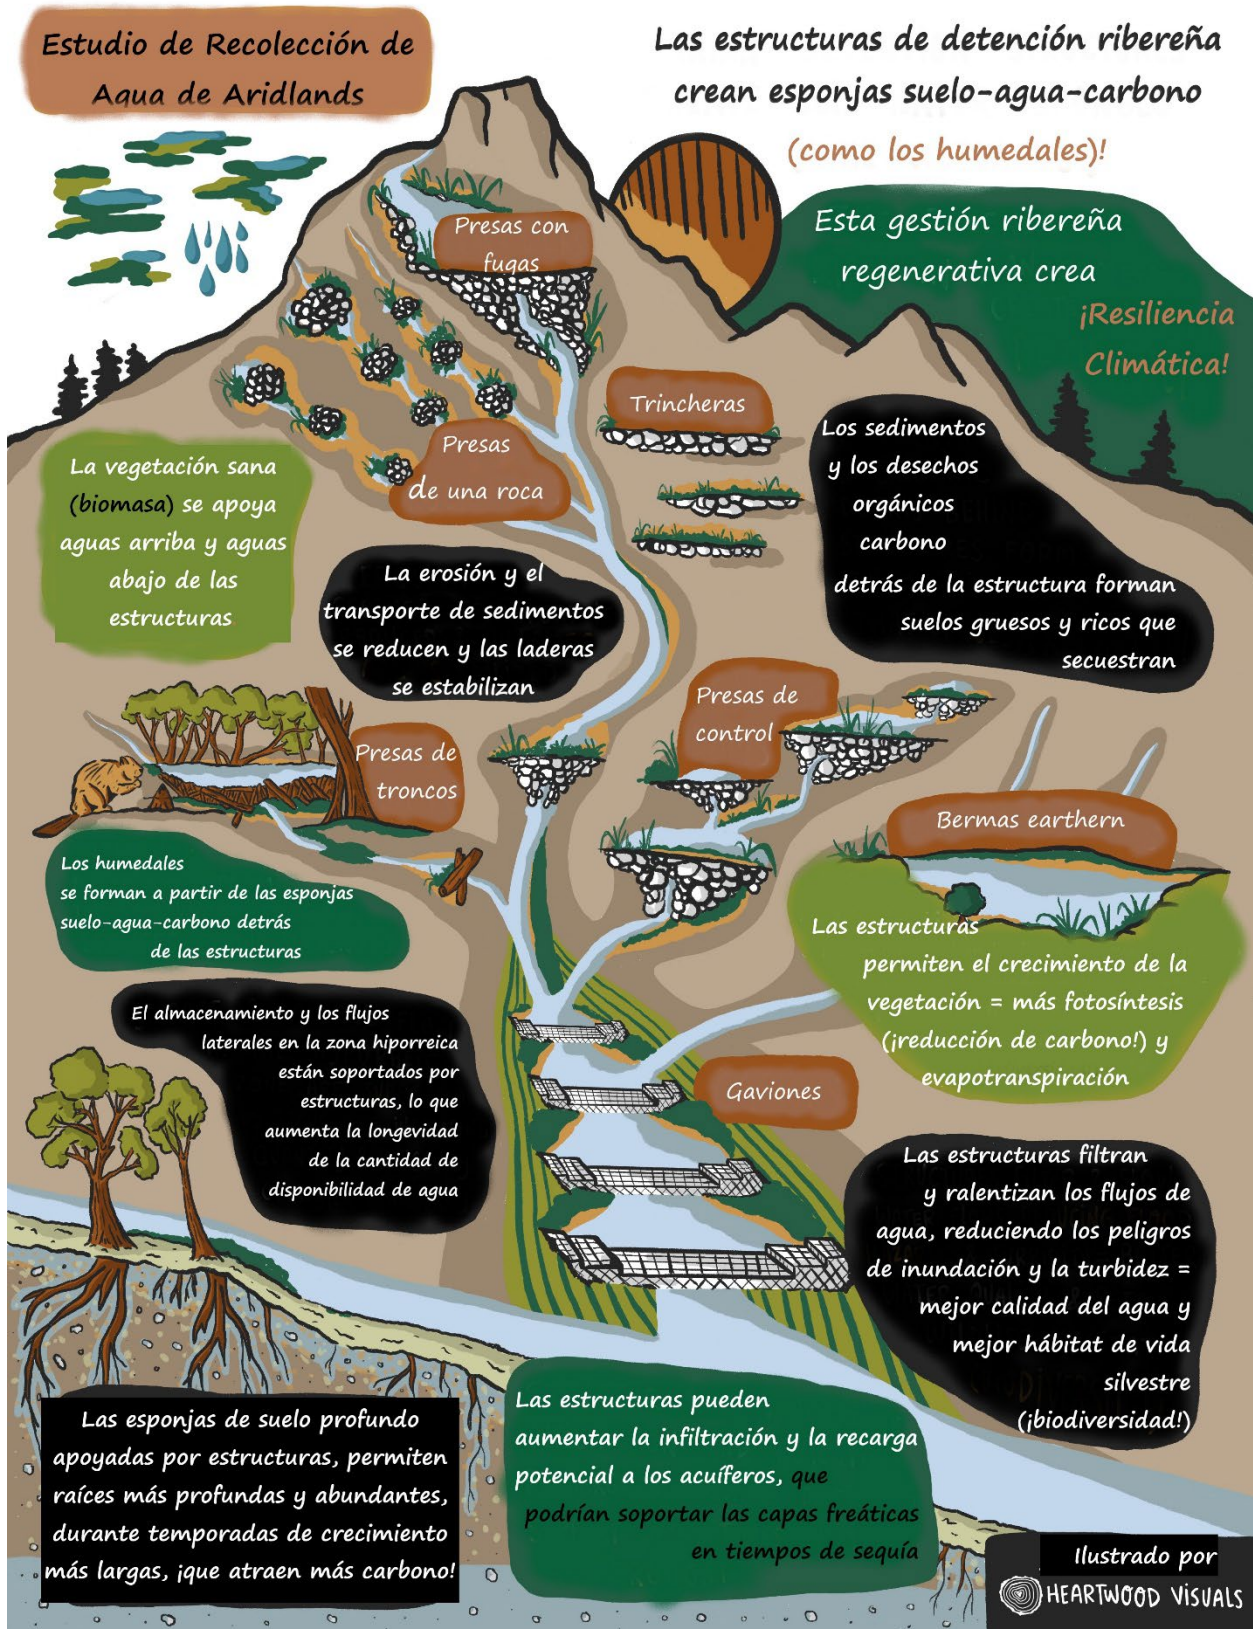

Figura 1. Gráfico informativo que representa la infraestructura natural en arroyos de tierras secas (INATS) en una cuenca hidrográfica y descripciones de sus prácticas climáticamente

*inteligentes documentadas, ilustrado por Heartwood Visuals (consulte el video complementario de 2 minutos animado por Hans J. Huth).*

### 1.1. Descripción general de las praderas de tierras áridas, los humedales (*Ciénegas*) y el almacenamiento de carbono y la hidrología de los corredores de *arroyos*

Comprender las características de los ecosistemas de las tierras secas es esencial para comprender cómo los INATS afectan sus procesos y funciones hidrogeomorfológicos y biogeoquímicos. A continuación discutimos el ciclo biogeoquímico de tres tipos históricamente comunes de ambientes fluviales en ecosistemas áridos, montañas o praderas húmedas, *ciénegas* y corredores de arroyos. Los prados de montaña a menudo existen cerca de las cabeceras de los arroyos como parches de paisaje planos, amplios e históricamente bien cubiertos de vegetación que brindan el tiempo y el espacio para que el agua se infiltre. Desafortunadamente, muchos prados de montaña se degradan y los arroyos que los atraviesan se cortan, lo que provoca la pérdida de su función (Hammersmark et al., 2008). Las *Ciénegas* son un tipo de humedal que se encuentra en ambientes áridos, a menudo alimentados por manantial y estacional o permanentemente saturados de agua, que ocurren en pastizales ondulados de bajo relieve o llanuras aluviales delimitadas por frentes montañosos con vegetación, y también están disminuyendo rápidamente (Hendrickson y Minckley, 1985; Minckley et al., 2013). Los corredores de arroyos son áreas donde el sedimento se erosiona (lecho y bancos) y se deposita (lecho, barras, llanura aluvial) por el agua que fluye y puede incluir gran parte del suelo del valle. Los canales de los arroyos en las regiones áridas y semiáridas a menudo se denominan '*arroyos*', particularmente cuando están secos y/o excavados en el aluvión del valle.

Antes de la colonización europea, se describió de manera similar que otros arroyos de América del Norte existían dentro de extensos humedales con vegetación y niveles freáticos altos que acumulaban poco sedimento pero almacenaban una cantidad sustancial de C orgánico (Walter y Merritts, 2008). Los humedales dentro de un área ribereña están conectados a la red fluvial a través del movimiento lateral del agua entre el canal y el área ribereña, a través de la inundación desbordante del flujo subterráneo (US EPA., 2015). Los humedales juegan un papel crucial en la mitigación y adaptación al cambio climático y son una SbN para reducir las emisiones de CO<sub>2</sub> y revertir las tendencias existentes del cambio climático (Erwin, 2009). Sin embargo, son vulnerables para modificación y pérdida y han sido ampliamente degradados por las actividades humanas (Davis, 1993; Jones et al., 2017). La investigación realizada por Heffernan (2008) revela mecanismos subyacentes al desarrollo de humedales en ecosistemas desérticos que representan los arroyos de tierras secas como un estado estable alternativo de las *ciénegas*. Y siguiendo, Minckley et al. (2013) describen el estado degradado actual de muchas *ciénegas* como arroyos de tierras secas con un mínimo de agua superficial y vegetación leñosa invasora. Se ha sugerido la restauración de humedales como un método para almacenar C y proporcionar muchos otros servicios ecosistémicos sociales, económicos y culturales (De Groot et al., 2013). Recientemente se ha destacado la importancia de restaurar y proteger los humedales costeros o marinos, ecosistemas de “carbono azul”, para el secuestro global de C (Moritsch et al., 2021). Sin embargo, los humedales interiores de agua dulce son ecosistemas de “carbono verde azulado” que pueden almacenar más carbono que los estuarios (Krauss et al., 2018 ; Nahlik y Fennessy, 2016). La mejora y el manejo del C orgánico del suelo (COS) en *ciénegas* y praderas de montaña pueden garantizar que el suelo se use, maneje y restaure de manera sostenible (Lal et

al., 2021). Parte del ciclo del C incluye la tasa de intercambio de CO<sub>2</sub> a través de la biomasa, a través de la fotosíntesis, que depende de la vida vegetal y las estaciones de crecimiento. Vegetación en zonas ribereñas, las llanuras aluviales y los humedales pueden aumentar la rugosidad de la superficie, lo que reduce las velocidades de flujo y aumenta las tasas de infiltración (Lane et al., 2018).

Los corredores de arroyos son áreas donde el sedimento se erosiona (lecho y bancos) y se deposita (lecho, barras, planicie de inundación) por el agua que fluye y puede incluir gran parte del suelo del valle. Los flujos de agua superficial regulan los procesos ecológicos en los ecosistemas fluviales (Poff et al., 1997). El flujo lateral subterráneo (también conocido como flujo continuo, flujo pluvial subterráneo, escorrentía subterránea e interflujo) ocurre cuando el agua se infiltra en el suelo y se mueve preferentemente lateralmente a través de los horizontes superiores del suelo hacia la corriente como agua subterránea efímera, poco profunda o suspendida, por encima del nivel principal del agua subterránea. (Hardie, 2011; Lehman y Ahuja, 1985). Esta región de mezcla y almacenamiento de sedimentos y espacio poroso debajo y a lo largo de los arroyos se denomina zona hiporreica, donde aumenta el tiempo de residencia, ocurren intercambios entre las aguas superficiales y subterráneas, y puede tener lugar el procesamiento de nutrientes y C (Grimm y Fisher, 1984).

En regiones de tierras secas, poco o ningún flujo lateral o canal de afluencia ocurre fuera de los períodos de inundación, y el escape de volúmenes se pierde en la transmisión del canal (infiltración o percolación y evapotranspiración) en muchas vías fluviales. La recarga de agua subterránea en áreas cálidas áridas y semiáridas ocurre solo donde el agua está concentrada y almacenada, como en canales, depresiones o áreas de alta infiltración (Coes y Pool, 2005). Es poco probable que ocurra el desarrollo de niveles freáticos elevados y flujo lateral subterráneo en condiciones secas (Brouwer y Fitzpatrick, 2002; Hardie et al., 2012; Smettem et al., 1991). Pueden ocurrir trayectorias de flujo hiporreico más lentas, profundas y largas en arroyos de valles no confinados, con gradientes hidráulicos moderados y volúmenes aluviales extensos. La explotación de los ríos ha causado degradación ecológica, pérdidas de diversidad biológica y reducción del caudal (Poff et al., 1997). La degradación de los ecosistemas ribereños de los paisajes áridos y semiáridos también está intrínsecamente relacionada con la disminución de los niveles freáticos aluviales y la reducción de la conectividad de las llanuras aluviales (Hall et al., 2015). Esto puede ocurrir a través de la incisión del canal, donde el canal incide a través del aluvión, provocando una caída en el nivel freático superficial y reduce la conectividad de los flujos para pasar por encima de la orilla hacia la llanura aluvial, lo que reduce el hidropérido de inundación y conduce a una reducción de la vegetación ribereña. Los arroyos degradados tienen una función ecológica limitada (Pollock et al., 2014). El régimen de flujo del río y la restauración exitosa dependen de las variaciones geográficas en el clima, la geología, la topografía y la cubierta vegetal (Poff et al., 1997). En los arroyos impactados por actividades humanas, la restauración de las zonas hiporreicas es esencial para la recuperación de las funciones de los arroyos y los servicios ecosistémicos (Hester y Gooseff, 2010; US EPA., 2015).

La lluvia y la respuesta de escorrentía asociada son más altas en las regiones montañosas del desierto, donde los arroyos pequeños y efímeros son más abundantes, lo que crea el potencial para una cantidad excesiva de recarga de agua subterránea en las tierras secas (Glenn et al., 2015; Goodrich et al., 2004).). Estos arroyos suelen tener más agua disponible para la infiltración;

sedimento más grueso (más permeable); mayor humedad antecedente; y mayor proximidad a aguas subterráneas poco profundas (US EPA., 2015). Los sedimentos de las llanuras aluviales en los arroyos de montaña tienen un contenido de C orgánico más alto que en otras regiones, particularmente en los ríos grandes (Sutfin y Wohl, 2017). Los suelos permeables, cuando se les presuriza con infiltraciones repetidas de agua, aumentan el almacenamiento y acumulan volumen de agua hasta que finalmente alcanza el nivel freático (Coes y Pool, 2005). Sin embargo, las cuencas montañosas contienen muchos canales empinados y volúmenes de aluviales limitados, lo que reduce el tiempo de residencia hidrológica y limita el intercambio hiporreico (Buffington y Tonina, 2009).

Las laderas empinadas y los canales inducen la erosión y el transporte de sedimentos dada la fuerte respuesta de lluvia y escorrentía. Los canales de arroyos efímeros en regiones áridas y semiáridas se denominan *arroyos*, a menudo excavados en el aluvión del valle (Bull, 1997; Elliott et al., 1999; Vyverberg, 2010). La incisión de los arroyos se ha producido tanto en el registro moderno como en el geológico, con un período de erosión generalizada y la incisión de los arroyos que afectó a muchas cuencas hidrográficas en el suroeste de Estados Unidos a finales del siglo XIX y principios del XX (Cooke y Reeves, 1976; Webb et al., 2014). La erosión descompone los agregados estructurales del suelo, eliminando y redistribuyendo selectivamente los sedimentos y el carbono desplazado en el paisaje (Lal, 2021). Revertir las pérdidas y restaurar la funcionalidad en las *ciénagas*, *arroyos* y praderas montañosas de las tierras secas respalda la recarga de las aguas subterráneas, reduce las inundaciones aguas abajo y mejora los procesos biogeoquímicos (US EPA., 2015).

## 2.0. Infraestructura natural en arroyos de tierras secas (INATS)

La restauración del paisaje se ha sugerido como una estrategia rentable para mitigar y adaptarse al cambio climático (Bustamante et al., 2019). Lal (2001) identificó el vínculo entre la desertificación de las tierras secas y la emisión de CO<sub>2</sub> del suelo y la vegetación a la atmósfera, sugiriendo mejoras en la calidad del suelo a través de la gestión de la tierra, como el establecimiento de una cubierta vegetal y la captación de agua. Exploró esta idea en pastizales áridos y tierras de cultivo con compostaje, agrobiodiversidad, cultivos de cobertura de invierno y establecimiento de vegetación en contornos y laderas para apoyar la pedogénesis (Lal, 2003). La restauración de canales a menudo se basa en la teoría de que los canales deben estar en equilibrio con el flujo, el sedimento y el gradiente, y el ajuste de la forma del canal puede conducir a este estado de equilibrio dinámico (Belnap et al., 2005; Gellis et al., 1995). Durante la última década, muchos científicos de restauración de ríos han promovido el cambio de enfoques estructurales específicos a esforzarse por restaurar los procesos fluviales (Beechie et al., 2010; Bernhardt y Palmer, 2011). La restauración debería revertir la disminución de la calidad del agua, los servicios ecosistémicos y el hábitat de agua dulce (Briggs y Osterkamp, 2021).

La infraestructura natural puede restaurar los procesos hidrológicos, geomórficos, pedagógicos y biológicos en los arroyos de tierras secas mediante la restauración de humedales históricos o la creación de nuevos entornos similares a humedales (Norman, 2021a). Los ejemplos de INATS pueden incluir presas de castores y sus análogos, presas de contención, gaviones, vertederos con fugas, presas de una roca y *trincheras* (Tabla 1; Figura 2). Se sabe que los INATS existen en este



planeta desde hace milenios y sus impactos son mundialmente reconocidos, tanto como estructuras de detención hechas por humanos (Norman, 2022) como presas de castores (Wohl, 2021). Sin embargo, existe una revisión limitada de la literatura que utiliza INATS como herramienta de restauración de ríos (Bernhardt y Palmer, 2011; Pfaeffle et al. 2022). Atribuimos esto a una desconexión asociada con el ingeniero, el tamaño, la nomenclatura, la intención de uso, el lugar y los materiales de construcción.

Hemos organizado la abundancia de evidencia científica concluyente que describe los impactos similares de cada uno de estos tipos de estructuras en varios arroyos de tierras secas del suroeste de los Estados Unidos para comparar las influencias consistentes y correspondientes en los procesos y funciones de las cuencas hidrográficas. Una faceta importante de los INATS es que, a pesar de que algunos de ellos tienen la palabra “presa” asociada a su nomenclatura, no son ni represar agua o formar cuerpos de agua, ni prevenir la transmisión aguas abajo, por ejemplo, para energía hidroeléctrica (Norman, 2022). Están diseñados para retener sedimentos y materia orgánica y detener el agua, permitiéndole pasar lentamente. Como tales, son más similares a una membrana semipermeable que a una presa.

*Tabla 1 . Tipos de INATS hechos por humanos o castores y sus descripciones en el contexto de esta revisión.*

| <b>INATS</b>                        | <b>Composición/Descripción</b>                                                                                                                                                                                                                                                                                                                                                                                  |
|-------------------------------------|-----------------------------------------------------------------------------------------------------------------------------------------------------------------------------------------------------------------------------------------------------------------------------------------------------------------------------------------------------------------------------------------------------------------|
| <b>Presas de castores</b>           | Estructuras construidas por castores ( <i>Castor</i> spp.), perpendicularmente en el canal, hechas de ramas, troncos, palos, cortezas, rocas, lado, hierba, hojas, etc. Los castores a menudo construyen grupos o complejos de múltiples presas en secuencia a lo largo de un canal (Fairfax y Whittle, 2020; Wohl, 2021).                                                                                      |
| <b>Análogos de Beaver Dam (APC)</b> | Estructuras hechas por el hombre, situadas perpendicularmente en el canal hechas de madera grande y otros materiales y construidas de una manera que imita deliberadamente la forma y función de una presa de castores natural; también conocido por muchos otros términos, incluidos 'Beaver Mimicry' y 'Simulated Beaver Structures' (Pollock et al., 2018; Silverman et al., 2019; Vanderhoof y Burt, 2018). |
| <b>Presas de control</b>            | Estructuras artificiales, situadas perpendicularmente en el canal, construidas apilando rocas sueltas de aproximadamente 1 m de altura, pero que varían en altura y longitud, dependiendo de las dimensiones del canal (Norman et al., 2016).                                                                                                                                                                   |
| <b>gaviones</b>                     | Estructuras hechas por el hombre, situadas perpendicularmente en el canal, construidas con material de cerca de 'alambre de gallinero' para construir jaulas, llenas de rocas y generalmente encajadas en lecho de roca o canales más grandes, y a veces apiladas verticalmente unas sobre otras, pero que varían en altura y longitud. dependiendo de las dimensiones del canal (Norman et al., 2010b).        |
| <b>Vertederos con fugas</b>         | Estructuras hechas por el hombre, situadas perpendicularmente en el canal, construidas por una pared de rocas cementadas sueltas, o presas de mampostería, encajadas en el lecho rocoso, y que varían en altura y longitud, según las dimensiones del canal (Coy et al., 2021).                                                                                                                                 |
| <b>Presas de una roca</b>           | Estructuras hechas por el hombre, situadas perpendicularmente en el canal, construidas con una capa de roca en el lecho y exactamente de una altura de 'una roca' pero que varían en longitud, dependiendo de las dimensiones del canal (Zeedyk, 2009).                                                                                                                                                         |
| <b>trincheras</b>                   | Estructuras hechas por el hombre, situadas en laderas perpendiculares al flujo descendente, construidas por una o dos capas de roca (Fish et al., 2013).                                                                                                                                                                                                                                                        |

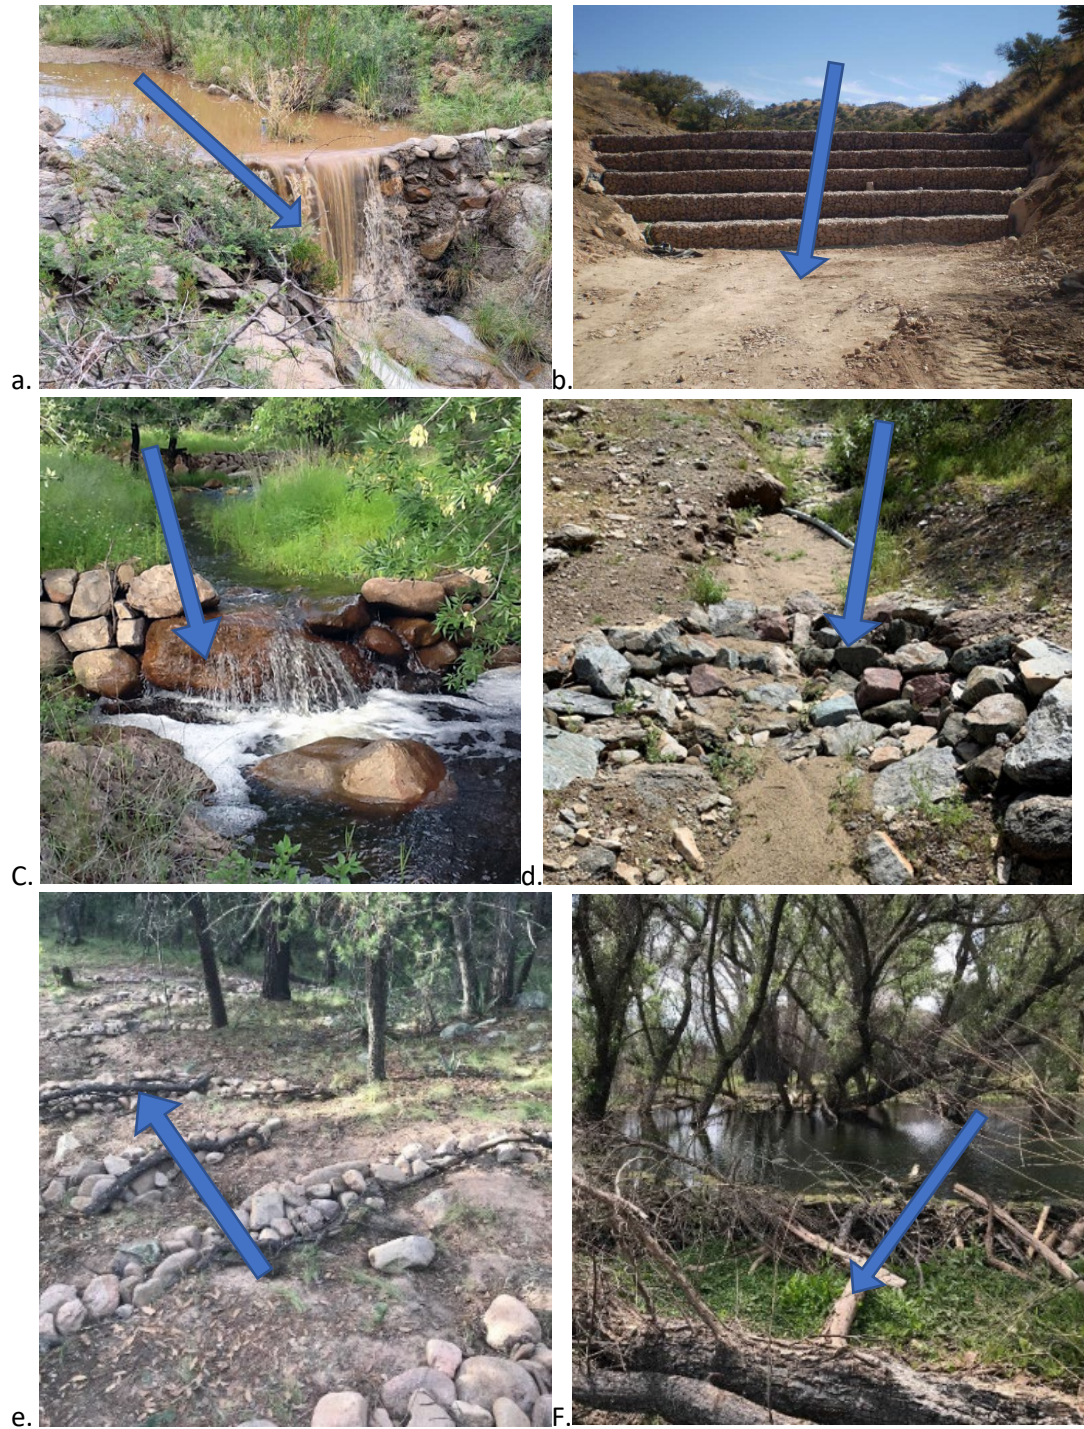

Figura 2. Ejemplos de INATS hechos por humanos y castores, que incluyen a) vertederos con fugas (foto de Josiah Austin), b.) gaviones (Foto de Andrea Prichard (Norman et al., 2010b) , c.) presas de contención (foto por Jeremiah Liebowitz), d) presas de una roca (Foto por Deborah Tosline (Tosline et al., 2020) ); e.) trincheras (Foto de Valer Clark), y f.) un dique de castores, donde las flechas azules representan la dirección del flujo.

## 2.1. INATS crea sumideros de suelo, agua y carbono

Hay muchas similitudes entre los sumideros de suelo-agua-carbono resultantes de diferentes tipos de INATS. Los estudios de los impactos de las presas de castores, los análogos de las presas de castores (APC) y las estructuras de detención de rocas aluden a estas similitudes (Norman et al., 2019; Pollock et al., 2003; Silverman et al., 2019; Wheaton et al., 2019). Los INATS almacenan agua y esto atenúa las inundaciones, proporciona reservorios de humedad del suelo que las plantas pueden utilizar y aumenta la disponibilidad de nutrientes. El papel de las presas de castores y las estructuras de detención de rocas en la creación de sumideros SWC ha sido reconocido durante más de mil años por culturas que preferentemente pastaban o cultivaban en antiguos prados de castores o llanuras río arriba de tales estructuras (Buckley y Nabhan, 2016; Fish et al., 2013; Howard y Griffiths, 1966; Leopold, 1937; Norman, 2020; Wohl et al., 2019). Existe una historia bien documentada del uso de INATS para mejorar el almacenamiento de agua, aumentar los flujos base río abajo, mejorar el flujo desbordante, reducir los flujos máximos, retener sedimentos, aumentar la calidad del agua río abajo, aumentar la concentración de COS y reforzar la resiliencia climática (Callegary et al., 2021; Norman, 2020; Norman et al., 2021b; Wohl, 2021). También se ha identificado la instalación de una amplia variedad y un gran número de estructuras de detención para restaurar las ciénegas históricas mediante la desaceleración de los flujos, el aumento de las filtraciones, el aumento de los niveles freáticos y la ampliación de los corredores ribereños (Minckley, 2013).

La hipótesis de que las *ciénegas* constituyen un estado estable alternativo en los arroyos del desierto fue presentada por Heffernan (2008), donde encontró que el establecimiento de la vegetación podría proporcionar una estructura geomórfica para ayudar a transformar los canales de secado en *ciénegas de humedales*. Asimismo, la investigación realizada sobre estructuras de detención de rocas instaladas en áreas ribereñas efímeras de arroyos de montaña de tierras secas ha documentado una transformación en vegetación, sedimentos y agua en áreas ribereñas que imitan la función biogeoquímica de las *ciénegas* (Norman, 2022, 2021a). Y de manera similar, las presas de castores y los APC alteran la geomorfología del paisaje, lo que hace que el flujo de agua disminuya y se extienda por las llanuras aluviales, lo que ayuda al crecimiento de las plantas y a la recarga de los acuíferos ribereños (Pollock et al., 2014; Scamardo y Wohl, 2020; Wheaton et al., 2019). Las fotografías de la construcción de una presa de castores muestran las similitudes entre la instalación de INATS hechos por humanos y por castores, ya que los castores a menudo comienzan sus presas como una presa corta de una roca o de contención instalada perpendicularmente a través de un canal (Figuras 3a y 3b). A medida que la represa se construye hacia su finalización, los materiales cambian a un componente más grande de desechos leñosos (Figuras 3c y 3d) (Fairfax y Whittle, 2020).

La estructura y función hidrogeomórfica determina hasta qué punto se estabilizan los arroyos de tierras secas y en qué estado se encuentran sus *ciénegas* (Heffernan, 2008). Sumideros de carbono-agua-suelo mejorados por INATS cuentan con hidrología, vegetación hidrófita y suelos hídricos que los categorizan como humedales (US EPA., 2015). Comparamos las similitudes de la investigación sobre INATS, donde los hallazgos representan el desarrollo de un sumidero de carbono de agua de suelo, o humedal - *Ciénega*, con todos los beneficios asociados.



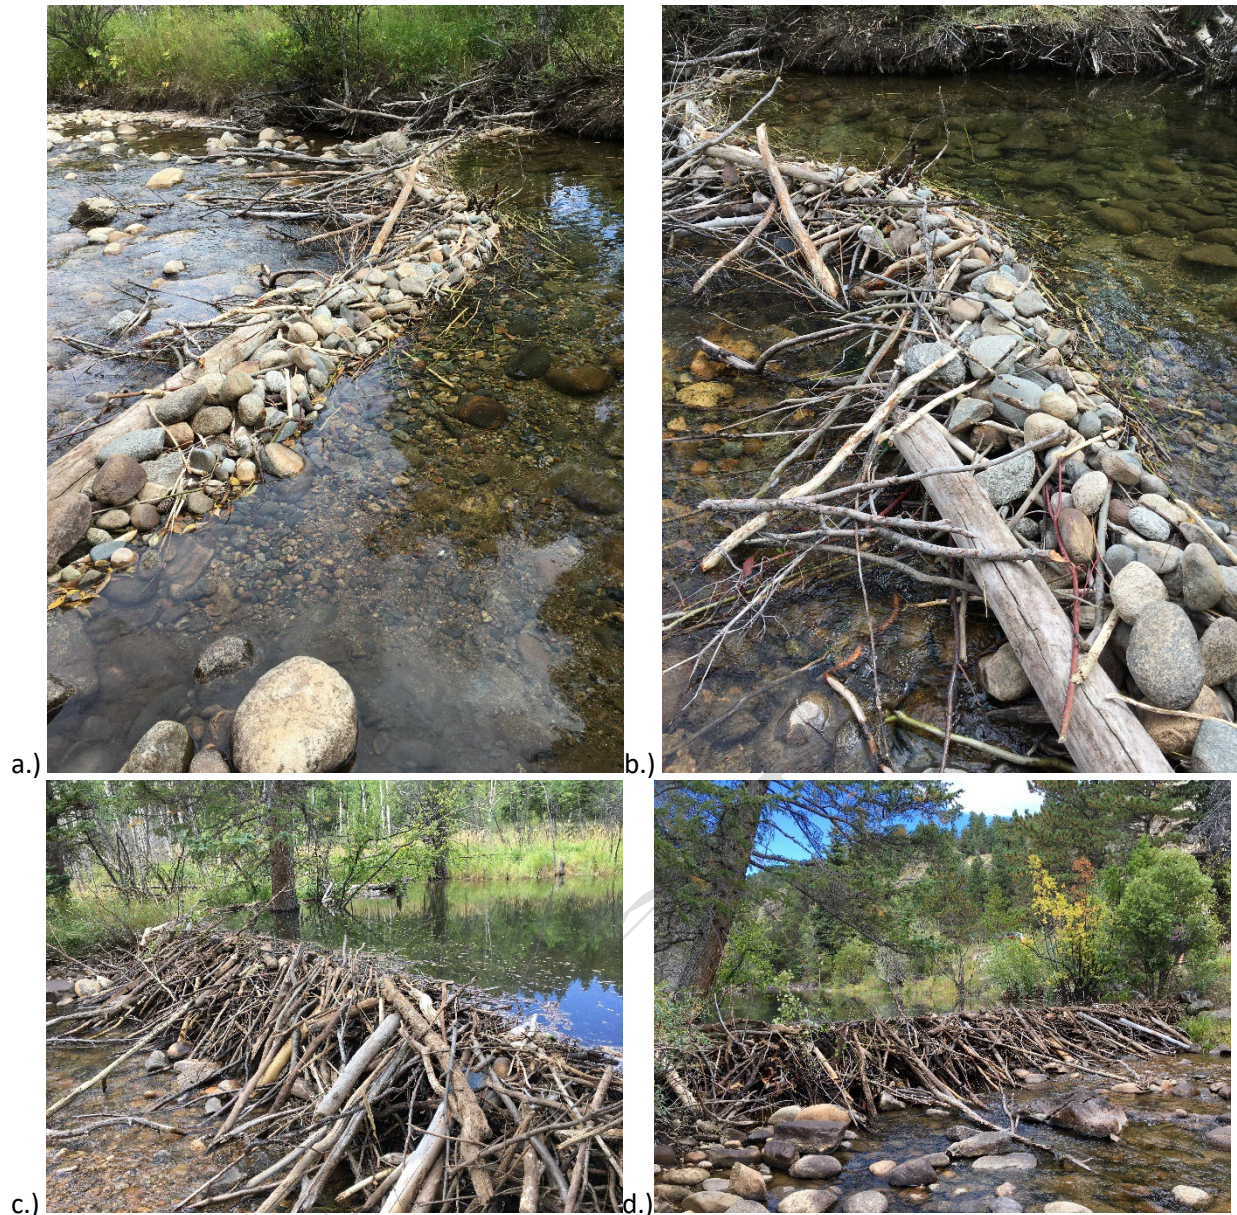

Figura 3: Fotografías de la presa de castores a. y b.) en etapas tempranas de construcción, y c. y d.) completamente construido (por Emily Fairfax).

## 2.2. Servicios de Mitigación y Adaptación Climática

Las prácticas de gestión del riesgo climático para las áreas ribereñas, los humedales y los ecosistemas dependientes de las aguas subterráneas incluyen aumentar el almacenamiento de agua en las llanuras aluviales y los canales mediante la gestión de las poblaciones de castores (Bouwes et al., 2016; Hood y Bayley, 2008; Westbrook et al., 2020), específicamente en arroyos de tierras secas (Gibson y Olden, 2014). Los profesionales contemporáneos de la restauración han observado cualitativamente muchos efectos de las estructuras de detención de rocas como causa de la instalación, incluido su potencial como soluciones simples de restauración de arroyos basadas en la naturaleza (Zeedyk y Clothier, 2009). Históricamente, la gestión urbana y agrícola ha incorporado infraestructura de aguas pluviales y BMPS de captación para restaurar los regímenes de flujo natural, reducir la contaminación y restaurar los flujos químicos en los

arroyos degradados, pero no ha reconocido esto como restauración de ríos (Bernhardt y Palmer, 2011). Los investigadores científicos notaron recientemente el potencial de los paisajes fluviales instalados con presas de castores y APC como infraestructura natural para mejorar la resiliencia al cambio climático y restaurar la salud del ecosistema (Skidmore y Wheaton, 2022). Los científicos sociales revisaron la investigación de estructuras de detención de rocas en cuatro lugares para describir su potencial como SbN (Gooden y Pritzlaff, 2021). Esta idea se amplió espacial y temporalmente para incluir más estudios de investigación originales de estructuras de detención de rocas, proporcionar un ejemplo de costo-beneficio y mostrar cómo el uso de estas estructuras puede aliviar los impactos del cambio climático en regiones socioambientalmente vulnerables (Norman, 2022). En México, la Comisión Nacional Forestal (CONAFOR) promueve el uso de estructuras de detención para la recuperación de tierras degradadas, para la conservación de suelos y aguas, el control de la erosión y la captación de agua de lluvia, así como para la adaptación y mitigación climática (Gerencia de Restauración Forestal, 2018).

El resto de este documento describe una SbN para rehidratar tierras áridas y mitigar el riesgo hidrometeorológico mediante el uso de varios INATS, hechos por humanos o diseñados por castores, que instigan procesos hidrogeomorfológicos y biogeoquímicos sostenibles de humedales con alta capacidad de almacenamiento de suelo, agua y carbono. Presentamos los servicios de mitigación y adaptación climática de INATS, que incluyen: (i) aumentar la disponibilidad de agua, (ii) reducir la erosión y promover la formación y productividad del suelo, (iii) almacenar C y N en sumideros similares a humedales, (iv.) controlar la escorrentía de aguas pluviales y filtrar el agua, (v.) aumentar la viabilidad de la vegetación y (vi.) disminuir las temperaturas y la variabilidad climática (Tabla 2). Estos se analizan en relación con los INATS en las ecorregiones del Mediterráneo de California, los desiertos de América del Norte, las montañas boscosas del noroeste y las tierras altas semiáridas del sur en el oeste de los Estados Unidos (Figura 4) y los procesos hidrológicos, geomórficos, pedagógicos y biológicos que mejoran la resiliencia a los peligros naturales. frente a las tierras secas.



1 **Tabla 2. Lista de servicios de mitigación y adaptación climática e investigación científica relevante para cada infraestructura natural en arroyos de**  
 2 **tierras secas (INATS).**

| <i>Servicios de mitigación y adaptación climática</i>                                         | Vertederos con fugas                   | gaviones                                                                                                                                                  | Trincheras y Diques de contención                                                                                                                                       | Presas de una roca                                                                                                                                                   | Presas de castores y análogos                                                                                                                                                                                                                                                                                                  |
|-----------------------------------------------------------------------------------------------|----------------------------------------|-----------------------------------------------------------------------------------------------------------------------------------------------------------|-------------------------------------------------------------------------------------------------------------------------------------------------------------------------|----------------------------------------------------------------------------------------------------------------------------------------------------------------------|--------------------------------------------------------------------------------------------------------------------------------------------------------------------------------------------------------------------------------------------------------------------------------------------------------------------------------|
| <i>Aumenta la disponibilidad de agua</i>                                                      | Coy et al. 2019; 2021; normando 2021a  | Fandel 2016; Fandel et al., 2016; normando 2020; 2021a; Norman et al., 2014; 2019; Uhlmann et al. 2020; Wilson y Norman 2018;                             | Gerencia de Restauración Forestal 2018; Heede y DeBano, 1984; normando 2020; 2021a; normando et al., 2016; Norman y Niraula 2016; Ponce y Lindquist, 1990               | normando 2020; 2021a; Norman et al., 2021; Silverman et al., 2019; Tosline et al., 2020                                                                              | Bouwes et al., 2016; Fairfax y Small 2018; Fairfax y Whittle 2020; Gibson y Olden 2014; Gurnell, 1998; Macfarlane et al., 2017; Naiman et al., 1988; Pilliod et al., 2018; Pollock et al., 2003; 2014; Puttock et al., 2017; Silverman et al., 2019; Vanderhoof y Burt, 2018; Westbrook et al., 2006; Blanco, 1990; Wohl, 2021 |
| <i>Mantiene los sedimentos en su lugar y promueve la formación y productividad del suelo</i>  | Coy et al., 2019; 2021; normando 2021a | Gerencia de Restauración Forestal 2018; normando 2020; 2021a; Norman et al., 2010a; 2010b; 2017; Norman y Niraula 2016                                    | DeBano y Heede, 1987; Gerencia de Restauración Forestal 2018; Geyik, 1986; normando 2020; 2021a; Norman et al., 2017; Norman y Niraula 2016; Smith y Wischmeier, 1962   | Gellis et al., 1995; Gerencia de Restauración Forestal 2018; normando, 2021a; Norman et al., 2021b; Silverman et al., 2019; Tosline et al., 2020;                    | Bouwes et al., 2016; Butler y Malanson 1995; Gibson y Olden 2014; Gurnell, 1998; Pollock y otros, 2003; 2014; 2018; Puttock et al., 2018; Scarmando y Wohl, 2020; Silverman et al., 2019; Westbrook et al., 2006; Wheaton et al., 2019; Wohl, 2021                                                                             |
| <i>Almacena C y N en los sumideros de carbono del agua del suelo donde crecen las plantas</i> |                                        | Callegary et al., 2021; Gerencia de Restauración Forestal 2018; normando 2020; 2021a                                                                      | Callegary et al., 2021; Gerencia de Restauración Forestal 2018; normando 2020; 2021a; Norman et al., 2017; Norman y Niraula, 2016                                       | Callegary et al., 2021; Gerencia de Restauración Forestal, 2018; normando, 2020; 2021a; Silverman et al., 2019                                                       | Gibson y Olden 2014; Lazar et al., 2015; Pollock et al., 2014; Johnston, 2014; Laurel y Wohl, 2019; Silverman et al., 2019; Sutfin y Wohl, 2017; Wohl 2013; 2020; 2021                                                                                                                                                         |
| <i>Controla la escorrentía de aguas pluviales y filtra el agua</i>                            | Coy et al., 2019; 2021; normando 2021a | Callegary et al., 2021; Fandel 2016; Fandel et al., 2016; 2016; Gerencia de Restauración Forestal 2018; normando 2020; 2021a; Norman et al., 2010a; 2010b | Callegary et al., 2021; DeBano y Heede, 1987; Gerencia de Restauración Forestal 2018; Geyik, 1986; Norman et al., 2017; Norman y Niraula 2016                           | Gerencia de Restauración Forestal 2018; normando 2021a; 2021b; Tosline et al., 2020;                                                                                 | Fairfax y Whittle 2020; Gibson y Olden 2014; Gurnell, 1998; Pollock et al., 2014; Westbrook et al., 2006; Wohl, 2021                                                                                                                                                                                                           |
| <i>Aumenta la viabilidad de la vegetación</i>                                                 | normando 2021a; Wilson y Norman 2019   | Gerencia de Restauración Forestal 2018; normando 2020; 2021a; Norman et al., 2014; Wilson y Norman 2018; 2019; Wilson et al., 2021                        | DeBano y Heede, 1987; Gerencia de Restauración Forestal 2018; normando 2020; 2021a; Norman et al., 2014; normando 2020; Wilson y Norman 2018; 2019; Wilson et al., 2021 | Gerencia de Restauración Forestal 2018; Huryna y Pokorný 2016; normando 2020; 2021a; Silverman et al., 2019; Wilson y Norman 2019; Wilson et al., 2021               | Fairfax y Small, 2018; Fairfax y Whittle, 2020; Macfarlane et al., 2017; Pilliod et al., 2018; Gibson y Olden 2014; Gurnell, 1998; Pollock y otros, 2003; 2014; Silverman et al., 2019; Conservación de la Naturaleza 2017; Vanderhoof y Burt, 2018; Wohl, 2021                                                                |
| <i>Disminuye la temperatura del aire y la variabilidad climática</i>                          |                                        |                                                                                                                                                           |                                                                                                                                                                         | Huryna y Pokorný 2016; normando 2021b; Norman et al., 2021b; Tosline et al., 2020; normando 2021a; Norman et al., 2021; Tosline et al., 2020; Zeedyk y Clothier 2009 | Silverman et al. 2019; Webber et al. 2017                                                                                                                                                                                                                                                                                      |

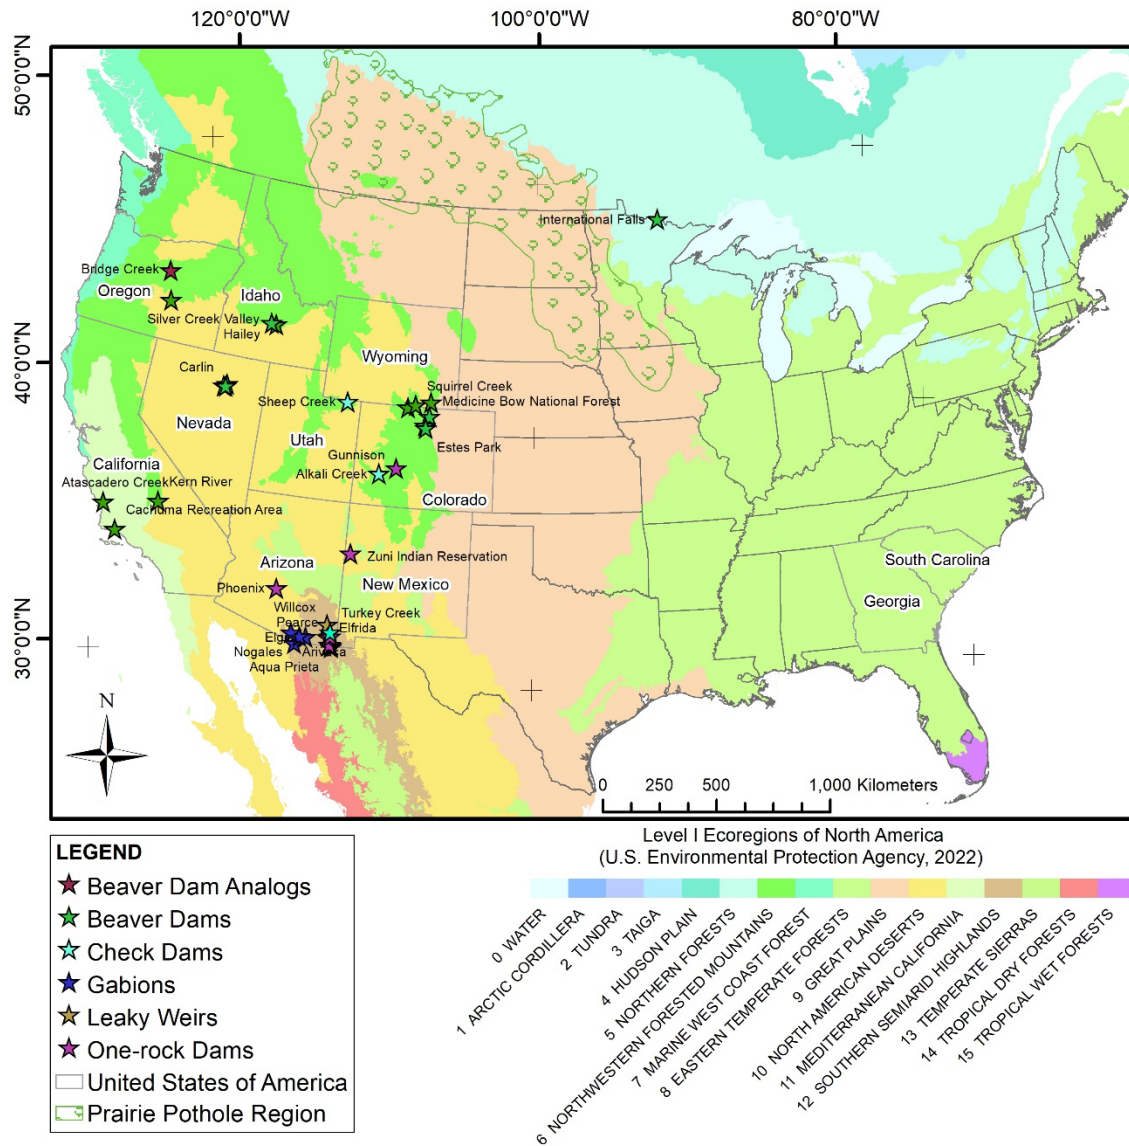

4  
5 *Figura 4. Mapa de ubicación de los Estados Unidos y la infraestructura natural en los arroyos,*  
6 *estados, ecorregiones y regiones de tierras secas discutidos en esta revisión (Tabla 2).*

### 2.2.1. Aumenta la disponibilidad de agua

El agua es un recurso limitado en los ambientes de tierras secas y el clima cambiante en el suroeste de los Estados Unidos, donde se espera que aumenten las temperaturas y se reduzcan las precipitaciones, lo que amenaza los suministros actuales. Los flujos superficiales y subterráneos poco profundos culminan en la respuesta de descarga de un río a las tormentas, donde las vías de agua subterránea suministran el flujo base (Poff et al., 1997). El río Colorado se enfrenta a una disminución potencial del caudal base de hasta un 33 % con los cambios previstos en el clima (Miller et al., 2021). Los resultados destacan que los cambios climáticos en la hidrología de gran altitud afectan la disponibilidad de agua de la cuenca. Se prevé que el porcentaje de caudal base perdido durante el transporte en la corriente disminuya entre un 1 y un 5 % en relación con las condiciones históricas (Miller et al., 2021). Durante los períodos de sequía, hay poca agua disponible para recargar los acuíferos y otros sumideros de agua del suelo, lo que se ve agravado por el efecto del aumento de las temperaturas en la evapotranspiración (Uhlman et al., 2020). El bombeo de agua subterránea se suma a los suministros de acuíferos agotados afectados por el cambio climático, y los períodos de sequía prolongados pueden simplemente no recargar el agua subterránea (Schreiner-McGraw y Ajami, 2021).

Puttock et al. (2017) planteó la hipótesis de que las características construidas por castores aumentan el almacenamiento de agua dentro del paisaje, con la creación de un canal de perfil escalonado. Las presas creadas por castores dan como resultado estanques a lo largo del canal del arroyo que elevan el nivel freático en la zona ribereña adyacente (Bouwes et al., 2016; Macfarlane et al., 2017; Naiman et al., 1988; Pollock et al., 2014, 2003). Vanderhoof y Burt (2018) cuantificaron los aumentos en el área de la superficie del arroyo a escala de alcance aguas arriba de múltiples APC en la cuenca superior del río Missouri, así como las disminuciones en el área de la superficie del arroyo para los tramos aguas abajo (hasta 500 m). En los proyectos de restauración que utilizan APC y presas de una roca, Silverman et al. (2019) sugiere que el agua almacenada detrás de las estructuras de restauración ayuda a reconectar las llanuras aluviales en Gunnison, Colorado, y Bridge Creek, Oregón (Figura 4). Estas estructuras aumentan la conectividad lateral, empujando el agua hacia los lados y creando diversos ambientes de humedales (Macfarlane et al., 2017). Bouwes et al. (2016) encontró aumentos en los flujos base, las tasas de ensanchamiento del canal y la sinuosidad después de la instalación de APC en Bridge Creek, OR. Las presas de castores impactan la conectividad lateral y longitudinal al introducir elementos de rugosidad y heterogeneidad que cambian fundamentalmente el tiempo, la entrega y el almacenamiento de agua, sedimentos, nutrientes y materia orgánica (Macfarlane et al., 2017). Los estudios describen los patrones de flujo debajo de las presas de castores, donde el flujo subterráneo lleva el agua de la corriente debajo de las estructuras e impacta los niveles de las aguas subterráneas ribereñas laterales (Gurnell, 1998; Westbrook et al., 2006; White, 1990). Las presas de castores y los APC pueden crear depresiones que están bien posicionadas para mejorar las zonas hiporreicas, aumentar la infiltración y la conectividad hidrológica (Nash et al., 2021). Se ha demostrado que las presas de castores atenúan la tasa de abatimiento al brindar disponibilidad de agua al área ribereña a través de vías de flujo superficiales y subterráneas (Westbrook et al., 2006).

Otros tipos de INATS pueden tener efectos similares. Por ejemplo, se restauraron flujos perennes en Alkali Creek, CO (Figura 4), 7 años después de que se instalaran 132 pequeñas presas de contención en arroyos efímeros con cárcavas (Heede y DeBano, 1984). Asimismo, en Sheep

Creek, Utah, se identificó un flujo perenne resultante de una pequeña represa (5 m) construida para retener sedimentos (Ponce y Lindquist, 1990). En Pearce, Arizona, una cuenca tratada con más de 2000 presas de contención experimentó un aumento del 28 % en el volumen del flujo, con flujos base de verano de mayor duración y la persistencia de charcos perennes, en comparación con una cuenca adyacente que no tiene ninguno. (Norman et al., 2016). Se sugirió que los acuíferos colgados se desarrollaran para almacenar el agua y liberarla lentamente con el tiempo en piscinas escalonadas (Norman et al., 2016). Las mediciones de campo en gaviones instalados en Elgin, Arizona, demostraron un aumento de la humedad del suelo en un promedio del 10 % después de la instalación de gaviones (Fandel et al., 2016; Fandel, 2016). En esta ubicación, el modelo de cuenca hidrográfica de la Herramienta de evaluación de suelos y agua (SWAT (Arnold et al., 2012) ) describió el potencial de la instalación de gaviones en toda la cuenca hidrográfica para aumentar la recarga potencial total del acuífero en un mínimo del 4 % [a partir de las condiciones de referencia], con aumentos notables en la conectividad del subsuelo y contribuciones de flujo lateral acentuadas, similares a los resultados identificados en las presas de castores (Norman et al., 2019). En Arivaca, Arizona, la instalación de gaviones mejoró las firmas de isótopos de recarga, lo que no ocurre en áreas sin gaviones, lo que demuestra el potencial para mejorar la recarga de aguas subterráneas (Uhlman et al., 2020).

### 2.2.2. Almacenamiento de sedimentos, formación de suelos y productividad

En ambientes de tierras áridas, los suelos suelen ser altamente erosionables, con un alto potencial de escorrentía y poca capacidad de retención de agua (Khresat et al., 2004). El monzón de América del Norte se extiende sobre gran parte del sudoeste de los Estados Unidos desde el noroeste de México y proporciona tormentas convectivas localizadas, intensas y de corta duración desde julio hasta septiembre (Adams y Comrie, 1997). A medida que el calentamiento global aumenta el vapor de agua en la atmósfera, se pronostica que los eventos de lluvia de alta intensidad aumentarán en el suroeste de América del Norte (Seager et al., 2007) , que cuando se combinan en áreas semiáridas con ciclos de sequía, provocan enormes problemas de erosión (Smith y Wischmeier, 1962). Si bien los flujos terrestres y de canales constantes ayudan a regular la dispersión de suelos, microbios, semillas y restos de plantas, la perturbación excesiva y los pulsos de precipitación pueden causar pérdidas por erosión que exceden el rango natural de variabilidad (Belnap et al., 2005). La erosión del suelo tiene impactos adversos severos en la calidad y funcionalidad del suelo, y causa GEI e, como CO<sub>2</sub>, metano (CH<sub>4</sub>) y óxido nitroso (N<sub>2</sub>O) (Lal, 2002). La salud del suelo está directamente relacionada con la salud de las plantas, los animales, las personas, el ecosistema y el planeta (Lal, 2020). La biomasa del suelo se compone de organismos vivos que mantienen la estructura del suelo a través de la formación de agregados, depende de la materia orgánica derivada de plantas y animales para obtener energía (de la fotosíntesis) y juega un papel importante en la cadena alimentaria. La biomasa total del suelo y la densidad en los estanques de castores pueden ser más de 2 a 5 veces mayores que en los sitios con corrientes de agua de movimiento más rápido (Naiman et al., 1988). El ciclo biogeoquímico, los flujos de GEI, la fertilidad del suelo y la producción primaria se ven afectados por la descomposición y los procesos pedogenéticos, y dependen de condiciones ambientales como la temperatura y la humedad (Belnap et al., 2005). Las costras biológicas del suelo (comunidades de líquenes, musgos, cianobacterias) se forman naturalmente en los suelos del desierto e influyen en el transporte de sedimentos, el almacenamiento de agua, la escorrentía y el secuestro de C, pero cuando se alteran, son especialmente vulnerables (Belnap et al., 2005; Caster et al., 2021).

Los procesos pedogenéticos o de formación de suelos dominantes en las tierras secas son la calcificación en suelos bien drenados y la salinización en sitios con drenaje deficiente (Lal, 2001). Los suelos se desarrollan lentamente en ambientes áridos, pero los climas, la respuesta lluvia-escorrentía y la humedad pueden influir en la velocidad de las reacciones y la meteorización (Lal, 2019b; Stavi et al., 2021).

Los INATS basados en rocas y otros tipos de INATS a menudo se han instalado principalmente para conservar el suelo, prevenir la erosión y aumentar la estabilidad del suelo. El control de la erosión y la captura de sedimentos se han documentado en gaviones (Norman et al., 2017, 2010b, 2010a), presas de contención (Norman et al., 2017; Norman y Niraula, 2016; Smith y Wischmeier, 1962), presas de una roca (Gellis et al., 1995; Norman et al., 2021b; Tosline et al., 2020), vertederos con fugas (Coy et al., 2019, 2021) y presas de castores (Butler y Malanson, 1995; Naiman et al., 1988; Puttock et al., 2018) y sus análogos (Scamardo y Wohl, 2020). En APC y presas de una roca, el flujo se ralentiza, lo que lleva a la deposición de sedimentos (Silverman et al., 2019). Los procesos hidrológicos impulsados por las presas de castores desempeñan un papel clave en el desarrollo del suelo al mantener las condiciones del suelo anegado durante períodos prolongados (Naiman et al., 1988; Westbrook et al., 2006). El aumento de los flujos base, la ampliación del canal y la sinuosidad después de instalar los APC demuestran cambios geomorfológicos, acentuados por la colonización de la vegetación, la sedimentación y la hidrología (Bouwes et al., 2016). Los INATS controlan los sedimentos río arriba, reducen la turbidez y mejoran la calidad del agua río abajo a través de mayores tiempos de residencia y filtración del agua. El aumento de agua, vegetación y sedimentos resultante de la instalación de estructuras de detención aumenta la bioproductividad y la resiliencia de las características estructurales del suelo (Callegary et al., 2021; Lal, 2001; Wohl, 2013).

### 2.2.3. Secuestro y almacenamiento de carbono

El albedo bajo, la cobertura vegetal irregular, los cambios en la geomorfología, la formación de costras biológicas y las proporciones de C de la biomasa microbiana respecto del C orgánico total se sugirieron como los cambios edáficos más pronunciados resultantes del cambio climático en el oeste de América del Norte (West et al., 1994). El carbono inorgánico del suelo (SIC) se deriva del C extraído de menas y minerales y rocas madre, y se denomina C litogénico (Lal, 2019b). La restauración de tierras secas puede ayudar a secuestrar C como carbonatos secundarios por medio del SIC devuelto al suelo a través de la formación de carbonatos secundarios y mediante aumentos en la biomasa (Lal, 2019b, 2008). Las plantas y los seres vivos son la fuente de C orgánico. Los suelos globales contienen 3 veces el C de la atmósfera (880 Pg) y 4 veces el de la vegetación (620 Pg), estimado a 1 m de profundidad para SOC (1550 Pg) y SIC (950 Pg) (Lal, 2018). La materia orgánica del suelo (MOS) es una mezcla que puede incluir raíces finas de plantas, partículas orgánicas, carbón y biomasa microbiana viva y se considera que contiene 50-60 % de COS (Lal, 2008; Stockmann et al., 2013). La erosión y el transporte de sedimentos pueden descomponer los agregados estructurales del suelo, eliminando y redistribuyendo selectivamente los sedimentos y el C desplazado en el paisaje (Lal, 2021). Lal (2003) argumenta que la adopción de medidas efectivas de conservación en paisajes erosionados revertiría las tendencias de degradación y aumentaría las reservas de C del suelo y del ecosistema. El SIC puede constituir una parte importante de los suelos áridos y semiáridos, debido a la calcificación y el caliche, pero la exposición y pérdida de importantes tierras áridas del SIC ha aumentado con la erosión eólica e hídrica (Lal, 2019b, 2004a, 2001).



El COS se puede almacenar en áreas ribereñas y humedales de agua dulce en (i.) biomasa vegetal ribereña en pie; (ii.) árboles grandes caídos; (3) MO, hojarasca y humus y sedimentos; y (4) biomasa vegetal en la corriente (Wohl, 2013). Los humedales de agua dulce de las tierras áridas pueden ayudar a mitigar el cambio climático al secuestrar C a través de la fotosíntesis de las plantas de los humedales y almacenar C mediante la acumulación de MO (Limpert et al., 2020). Esto a veces se niega en los humedales donde los eventos de lluvia intensa pueden causar grandes emisiones de CO<sub>2</sub> (Ouyang et al., 2021) o si se interrumpen otros ciclos de retroalimentación biogeomórficos (Temminck et al. 2022).

La saturación hidrológica de los suelos de humedales de agua dulce acelera el crecimiento de las plantas, limita la oxidación que ralentiza los procesos de descomposición microbiana anaeróbica y aumenta el secuestro de C a través de la absorción de CO<sub>2</sub> de la vegetación (Limpert et al., 2020). La vegetación perenne almacena C atmosférico tanto en la biomasa viva como en la senil, a menudo durante períodos decenales o más prolongados a través de la biomasa de las raíces y los exudados (Lal, 2008, 2004b). Las plantas, trabajando con los microorganismos del suelo, extraen C de la atmósfera a través de la fotosíntesis y lo almacenan en el suelo (Ohlson, 2014). Los bosques ribereños y las áreas de llanuras aluviales son importantes sumideros de C, que atrapan y entierran sedimentos ricos en C y desechos leñosos arrastrados por los flujos de inundación (Sutfin y Wohl, 2017; Wohl, 2020). En el Parque Nacional Voyageurs, Minnesota, Naiman et al. (1988) identificaron el impacto que las presas de castores estaban teniendo en el ciclo C. Desde entonces, se ha documentado el tremendo potencial para el almacenamiento de C en varios sitios de castores en todo el país (Johnston, 2014; Laurel y Wohl, 2019; Wohl, 2013). Se validó un modelo de cuenca con mediciones del terreno de alta resolución para cuantificar la cantidad de sedimentos almacenados detrás de las presas de control (Norman et al., 2017) y también se usó para ampliar las estimaciones de erosión y deposición de sedimentos (Norman y Niraula, 2016). Los análisis de isótopos se realizaron en muestras tomadas a 2 intervalos de profundidad (0-10 cm y 20-30 cm por debajo de la superficie del suelo mineral) (Callegary et al., 2021). Usando estimaciones de rendimiento de sedimentos derivadas del modelo de cuenca y teniendo en cuenta el tamaño de la cuenca y el número de estructuras (769 ha/2000 presas de control), Callegary et al. (2021) calcularon una estimación conservadora de la captura potencial total de C para INATS en ~200-250 Mg/ha, que es equivalente a los niveles almacenados en los humedales (ver Tabla 3).

Tabla 3. Tasas ascendentes de almacenamiento de C en el suelo según lo informado en la literatura.

| Referencia            | Descripción                                                                       | Lugar                                | Suelo Mg C/ha |
|-----------------------|-----------------------------------------------------------------------------------|--------------------------------------|---------------|
| Tangen y Bansal, 2020 | Humedal Prairie Pothole Region (área interior)                                    | Medio oeste superior, EE. UU.        | 66            |
| Buringh, 1984         | Suelos de pastizales secos                                                        | Global                               | 40-100        |
| -Haughn et al. 2006   | Humedal de la región de los baches de la pradera                                  | Medio oeste superior, EE. UU.        | 175.1         |
| Badiou et al. 2011    | Humedal de la región de los baches de la pradera                                  | Medio oeste superior, EE. UU.        | 205           |
| Callegary et al. 2021 | Estructura de detención de rocas sumideros de suelo-agua-carbono                  | Sudeste de Arizona, EE. UU.          | 200-250       |
| Ouyang y Lee 2020     | Manglar (humedales de marea)                                                      | Global                               | 283-361       |
| Wohl, 2013            | Prados de castores relictos, Parque Nacional de las Montañas Rocosas              | Estes Park, Colorado, Estados Unidos | 300-400       |
| Krauuss, et al. 2018  | Sitios de marismas a lo largo de los estuarios de marea superior del río Savannah | Georgia, Estados Unidos de América   | 455           |
| Krauuss, et al. 2018  | Sitios de marismas a lo largo de los estuarios de marea superior del río Waccamaw | Carolina del Sur, Estados Unidos     | 1258          |
| Wohl, 2013            | Prados de castores activos, Parque Nacional de las Montañas Rocosas               | Estes Park, Colorado, Estados Unidos | 1150-1400     |

#### 2.2.4. Atenuación de inundaciones y protección de la calidad del agua

Los eventos de precipitación extrema pueden causar que grandes cantidades de escorrentía de aguas pluviales busquen rápidamente elevaciones de relleno en el paisaje (Norman et al., 2010a). La velocidad del flujo terrestre y superficial puede transportar sedimentos y vegetación, recorriendo las laderas de las tierras altas; la tasa de flujo determina en gran medida su destino en el balance de agua (Goodrich et al., 1994). Las inundaciones catastróficas reducen la vegetación y erosionan los arroyos del desierto, lo que *provoca la* degradación de la ciénaga (Heffernan, 2008). Los climas cálidos y secos tienen una alta evaporación, acelerada por el aumento de la superficie del agua. Los flujos de alta velocidad en la superficie tienen más poder para transportar sedimentos u otros obstáculos que encuentran que los flujos de movimiento lento (Lal, 2021). A medida que el agua se infiltra en la superficie, puede contribuir a los flujos subterráneos o laterales, filtrarse a las aguas subterráneas o ser transpirada por las plantas, apoyando los procesos ecológicos y biogeoquímicos. Los eventos de precipitaciones erráticas e intensas, que se prevé que aumentarán con los cambios climáticos, pueden sobrecargar los sistemas de transporte y causar inundaciones, lo que pone en riesgo los medios de subsistencia, la salud pública y la vida humana (Norman, 2021b; Norman et al., 2010a).

Jia et al. (2020) describieron cómo la gestión extensiva del agua de lluvia urbana, denominada medidas de esponja, está mejorando las condiciones hidrológicas del suelo en la meseta de Loess de China. Asimismo, los INATS y sus sumideros de carbono de agua y suelo ayudan a regular los flujos de agua altos y bajos y mejorar la calidad del agua aguas abajo a través de aumentos asociados en los tiempos de residencia del agua. El almacenamiento de agua que ofrecen los

estanques de castores reduce las inundaciones río abajo. Los estanques de castores se instrumentaron antes de una gran tormenta en Alberta, Canadá, en 2013 y se descubrió que, después de llenarse rápidamente, los niveles eran dinámicos durante el evento (Westbrook et al., 2020). Ese mismo año, se midió la respuesta lluvia-escorrentía de una cuenca tratada con miles de presas de contención, mostrando una reducción de los eventos de caudal máximo a la mitad (Norman et al., 2016). También se modelaron los gaviones instalados en Nogales, Sonora, México, para identificar sus impactos en el hidrograma de eventos de tormenta, con resultados que muestran una gran reducción de eventos de flujo derivados de eventos de precipitación más pequeños (10 años/1 hora), con poco impacto en los flujos inducida por tormentas más grandes (eventos de lluvia de 100 años/6 horas; (Norman et al., 2010b).

Los INATS que retienen sedimentos pueden reducir la contaminación de fuentes difusas río abajo y mejorar la calidad del agua (Norman et al., 2017, 2016, 2010b). Las tasas de flujo reducidas, cuando se modelan, representan una menor turbidez y suministros de agua aguas abajo más claros (Norman y Niraula, 2016). Wang et al., (2020) encontraron que los humedales pueden eliminar cargas difusas de nitrógeno a través de flujos laterales. La MO en los sedimentos (tanto C como N) atrapada durante la escorrentía posterior a un incendio forestal es de 2 a 10 veces mayor detrás del INATS que en los suelos fuera del canal (Callegary et al., 2021). El INATS ayudó a volver a enterrar rápidamente la biomasa movilizada, la MOS y la MO carbonizada (C pirogénica) después de un incendio forestal (Callegary et al., 2021). Los INATS son una estrategia de adaptación climática que reducen el tamaño de las inundaciones y pueden mejorar la calidad del agua.

### 2.2.5. Aumenta la viabilidad de la vegetación

Los tratamientos INATS efectivos ayudan a mejorar la productividad fuera del sitio, extendiendo sus beneficios a una porción más grande de la cuenca y manteniendo los beneficios por un período de tiempo más largo. La represa de castores crea estanques de castores que actúan como amortiguadores contra los efectos de la sequía en la vegetación ribereña cercana al retener agua durante las épocas más húmedas del año y liberarla gradualmente durante las épocas más secas del año en los suelos donde la vegetación ribereña puede acceder al agua (Fairfax y Small, 2018; Fairfax y Whittle, 2020; Gurnell, 1998; Pilliod et al., 2018). Fairfax y Small (2018) calcularon la evapotranspiración y el índice de vegetación de diferencia normalizada (NDVI) de la vegetación ribereña de 2013 a 2016 en los arroyos utilizados como control frente a los tratados por castores. La evapotranspiración de las áreas ribereñas con presas de castores fue de 50 a 150 % más alta y el NDVI fue de 6 a 88 % más alto que sin actividad de castores. Las diferencias alcanzaron su punto máximo cuando el paisaje estaba en su estado más cálido y seco. Los resultados indican que las áreas ribereñas de tierras secas tratadas con presas de castores son más capaces de mantener la productividad de la vegetación que las áreas sin ellas, durante períodos de sequía tanto cortos como extensos (Fairfax y Small, 2018).

La instalación de APC resultó en aumentos del verdor ribereño a lo largo de los tramos de restauración de la cuenca de las cabeceras del río Missouri (Vanderhoof y Burt, 2018). Las imágenes satelitales también se usaron para evaluar los cambios en el "verdor" de las presas de una roca cerca de Gunnison, COLORADO y APC en Bridge Creek de Oregón (Silverman et al., 2019). La restauración de baja tecnología (presas de una sola roca y APC) en los sistemas

riberaños y de praderas húmedas aumentó efectivamente la productividad de la vegetación en magnitud y duración, lo que sugiere un mayor almacenamiento de agua en el suelo y el potencial para mejoras en toda la cuenca que son más resistentes durante la sequía (Silverman et al., 2019). Este estudio encontró que la temporada de crecimiento se extendió hasta fines del verano y los meses de otoño con aumentos de verdor de hasta un 25 por ciento después de que se restauraron los arroyos en comparación con antes de la construcción de presas con un aumento de la cubierta vegetal de los humedales del 160 % (entre 28 y 245 %) en cuatro sitios tratados, en comparación con un aumento del 15% en los sitios no tratados (cuatro años después del tratamiento).

Asimismo, en la frontera de Douglas, Arizona, Estados Unidos, y Agua Prieta, Sonora, México, se utilizaron grandes gaviones para restaurar una *ciénega histórica*. Usando imágenes satelitales que representan el área durante un período de 27 años, se documentó que la productividad de la vegetación se mantuvo y mejoró en las estructuras de gaviones, a pesar de las condiciones de sequía (Norman et al., 2014) , y que esto se evidenció extendiéndose hasta 5 km río abajo y 1 km aguas arriba de cada estructura (Wilson y Norman, 2018a). La retención de sedimentos y la reducción en la descarga máxima de eventos de flujo relámpago respaldan y propagan el crecimiento de las plantas, lo que continúa el ciclo de retención de sedimentos y reducción de flujos (Norman, 2021b, 2021a; Norman et al., 2014; Wilson y Norman, 2018a). Además del aumento en la condición de la vegetación y la cobertura creada por INATS, se está produciendo la aparición de obligaciones de agua en los sitios de estudio, asociadas con la saturación prolongada o inundaciones en los humedales creados (Norman et al., 2014; Wilson y Norman, 2019, 2018a).

#### 2.2.6. Disminuye las Temperaturas y la Variabilidad Climática

Los desiertos y las nubes tienen altos albedos y reflejan una gran parte de la radiación solar de onda corta (alguna hacia el espacio). Según la temperatura y la composición de una nube, las nubes absorberán la radiación de onda larga emitida por la superficie de la Tierra y volverán a emitir algo de radiación hacia la superficie. La radiación de onda larga emitida por la superficie también puede ser absorbida por los gases traza en el aire, calentando el aire y volviendo a irradiar energía hacia la superficie de la Tierra, lo que hace que el aire cerca de la superficie se caliente más (Graham, 1999). Este efecto de calentamiento del aire en la superficie es el efecto invernadero atmosférico, debido principalmente al vapor de agua en el aire, pero potenciado por los gases de efecto invernadero y disminución del albedo. El suelo bien vegetado absorbe y vuelve a irradiar menos calor a la atmósfera que la tierra desnuda sin vegetación. La reducción del albedo, como se observa en la forestación de tierras áridas, afecta el balance energético y la evapotranspiración de la nueva vegetación da como resultado el enfriamiento de la superficie y aumenta la humedad y la precipitación (Yosef et al., 2018). El calor latente absorbido y liberado durante la evaporación y la condensación transfiere energía desde la superficie cálida a la atmósfera más fría, donde la radiación infrarroja se emite de regreso al espacio (Siler et al., 2019). En temperaturas más frías, el calor latente se libera a través de la condensación, formando gotas de nube y precipitado para transportar el agua de regreso a la superficie de la Tierra (Graham et al., 2010).

Huryna y Pokorný (2016) enfatizan el papel del agua y las plantas en la reducción de los gradientes de temperatura con ejemplos de restauración de paisajes secos que tienen efectos positivos en la retención de agua de lluvia y la recuperación de la vegetación permanente. Los

sumideros de carbono de agua del suelo y las plantas que crecen allí tienen agua que usa energía durante la vaporización que enfría la superficie. Las microgotas de las nubes, demasiado pequeñas para caer como lluvia, formarán nubes que darán sombra. Además del secuestro de C que puede ayudar a frenar y revertir el cambio climático (descrito en la sección 2.1.3), con el aumento observado en la disponibilidad de agua (descrito en la sección 2.1.2), dentro y al lado de los sumideros de carbono de agua y suelo creados por el INATS, aumenta la viabilidad de la vegetación (descrito en la sección 2.2.5), que a su vez da sombra, enfría y protege una mayor parte de la superficie de la Tierra del sol intenso, el viento, las inundaciones y otros extremos (Donavan, 2020; Jehne, 2017, 2016).

Webber et al. (2017) estudiaron los regímenes de temperatura de la corriente en presas de castores y APC, y encontraron temperaturas reducidas de la corriente y del aire, específicamente mejoradas por una mayor disponibilidad de agua en la cuenca en general; sugieren que estos INATS podrían usarse para crear refugios para mitigar los impactos climáticos que pueden amenazar a las especies sensibles. En Phoenix, Arizona, se documentó un efecto de enfriamiento del microclima en presas de una roca recién instaladas. Antes de que pudieran desarrollarse los impactos de los sedimentos o la vegetación, las temperaturas se redujeron entre 2 y 3 °C después de la lluvia (Norman et al., 2021b; Tosline et al., 2020). El agrupamiento de rocas y la detención del flujo mantuvieron las propiedades refrescantes del agua durante 2 o 3 días después de la lluvia. Si bien cada estructura puede instigar la variabilidad del microclima en el sitio, los impactos de más y más estructuras serán mayores y se expandirán a áreas más grandes. Como suelo-agua-carbono sumideros se desarrollará, más agua se alojará allí y los efectos de enfriamiento se multiplicarán a medida que la vegetación eche raíces, proporcionando sombra; la hidrología y la dinámica del calor provocan la transpiración, lo que mantiene disponible agua más fría en el suelo; y la condensación puede hacer que se formen nubes sobre áreas con vegetación y perpetuar el ciclo, trayendo de vuelta la humedad a mayor escala. Esta estrategia de mitigación climática, de instalar INATS, tiene efectos de enfriamiento acumulativos a lo largo del tiempo y espacio. (Norman, 2021b; Norman et al., 2021b; Tosline et al., 2020).

### 2.3. Resiliencia al Riesgo Hidrometeorológico

Los peligros relacionados con el cambio climático presentan desafíos ambientales globales. En las regiones de tierras secas del oeste de los Estados Unidos, el cambio climático está aumentando las sequías peligrosas, la escasez de agua, las inundaciones, las olas de calor, las tormentas de polvo y los incendios forestales (Overpeck, 2021). Los ecosistemas sanos son más resistentes y pueden recuperarse más rápidamente de las perturbaciones externas (Pimm, 1984). El desarrollo de nuevos entornos similares a los humedales, o sumideros de carbono del agua del suelo, reduce la sensibilidad de los ecosistemas al cambio climático, creando una resiliencia que puede ser sostenible y ayudar a regular el clima a través del secuestro y almacenamiento de C. El aumento de la densidad, la salud y el área de la vegetación identificados en las presas de castores y los APC ayudan a disminuir el flujo de agua y, en última instancia, reducen la intensidad de las inundaciones, las sequías y los incendios forestales dentro de la zona ribereña (Fairfax y Small, 2018; Fairfax y Whittle, 2020; Randall, 2021). La composición y abundancia de la vegetación antes de perturbaciones, como incendios, aumentan la resiliencia de los humedales para recuperarse post-incendio. Las estructuras de detención de rocas se han documentado a través de un riguroso estudio interdisciplinario para reducir la vulnerabilidad a la sequía y las inundaciones, promover la conservación del suelo, secuestrar carbono, aumentar la



disponibilidad de agua y también promover los efectos de enfriamiento (Norman, 2020; Norman et al., 2021b). La efectividad de los sumideros de carbono de agua y suelo inducidos por INATS en relación con la reducción de riesgos hidrometeorológicos a escala de paisaje y cuenca se describe a través de su potencial para crear servicios de adaptación y mitigación climática, descritos en la Sección 2.2., y resumidos en la Tabla 4.

### 2.3.1. Aumenta la biodiversidad

Las plantas, los animales y los microorganismos que se encuentran tanto por encima como por debajo del suelo constituyen la comunidad biótica. Los INATS aumentan la integridad ecohidrológica al respaldar la variabilidad que permite que prosperen las comunidades bióticas. La diversa composición y estructura de las comunidades de plantas ayuda en la recolección de agua para resistir la sequía y ayuda a las plantas a recuperarse de la sequía. La diversidad nativa llena nichos que de otro modo podrían estar abiertos para especies invasoras. Además del aumento en la condición y cobertura de la vegetación en INATS, se producen aumentos en la diversidad en los sumideros de carbono del agua del suelo, documentados por la aparición de vegetación de humedales (obligaciones de agua) que ocurren en los sitios de estudio, asociados con saturación prolongada o inundaciones causadas por rocas. estructuras de detención (Norman et al., 2014; Wilson y Norman, 2019, 2018a) y diques de castores (Naiman et al., 1988; Silverman et al., 2019). Al aumentar la viabilidad y la longevidad de la vegetación y promover los regímenes de flujo y el mantenimiento de las charcas perennes de las tierras altas en los ecosistemas de las tierras secas, se pueden mantener los procesos ecológicos críticos para muchas especies (Bogan y Lytle, 2011). Incluso la rehabilitación menor de ecosistemas degradados puede restaurar parte de la biodiversidad y servicios clave (Geist y Hawkins, 2016). Y los esfuerzos más grandes pueden tener un gran impacto en una especie. Por ejemplo, se instalaron 385 presas de una roca en Colorado para restaurar 20 ha en 13,7 km de arroyos, lo que mejoró aproximadamente 160 ha de hábitat de artemisa del que dependen los urogallos de Gunnison durante todo el año (The Nature Conservancy, Gunnison Climate Working Group, 2017).

La biodiversidad de agua dulce está amenazada por los impactos del cambio climático. La presencia de presas de castores puede aumentar la densidad de la vegetación y crear un hábitat para peces con mayor productividad o diversidad (Pollock et al., 2003). La investigación ha encontrado que los APC mejoraron el hábitat de la trucha arcoíris (*Oncorhynchus mykiss*), un pez incluido en la Ley de especies en peligro de extinción (Bowes et al., 2016; Pollock et al., 2014; Weber et al., 2017), el urogallo de las artemisas (*Centrocercus urophasianus*) y ranas manchadas de Columbia (*Rana luteiventris*) (Davee et al., 2019). En Montana, se encontró que la densidad de macroinvertebrados era mayor en las secciones de un arroyo tratado con castor y APC que en los sitios de control (Reinert et al., 2022).

**Tabla 4 . Riesgos hidrometeorológicos que pueden ser abordados por la infraestructura natural en arroyos de tierras secas (INATS) como soluciones basadas en la naturaleza en función de sus efectos de adaptación o mitigación climática, con referencias.**

| <b>Riesgo</b>                    | <b>Solución basada en la naturaleza (SbN)</b>                                                                                                                                                                                                                                                                                                                             | <b>Estrategia de adaptación o mitigación climática</b>                                                                                                                                        | <b>Referencias</b>                                                                                                                                                                                                                                                                                                                      |
|----------------------------------|---------------------------------------------------------------------------------------------------------------------------------------------------------------------------------------------------------------------------------------------------------------------------------------------------------------------------------------------------------------------------|-----------------------------------------------------------------------------------------------------------------------------------------------------------------------------------------------|-----------------------------------------------------------------------------------------------------------------------------------------------------------------------------------------------------------------------------------------------------------------------------------------------------------------------------------------|
| <i>Sequía</i>                    | Los INATS reducen la sensibilidad de los ecosistemas a la sequía al mejorar la captura, el almacenamiento y la liberación segura del agua del suelo, y al promover la productividad y diversidad de la vegetación en los sumideros de carbono del agua del suelo., esto respalda la función general del ecosistema utilizando menos precipitación.                        | 2.2.1. Aumenta la disponibilidad de agua.<br>2.2.2. mantiene los sedimentos en su lugar y promueve la formación y productividad del suelo; y<br>2.2.5. Aumenta la viabilidad de la vegetación | Gurnell, 1998; Huryňa y Pokorný, 2016; Norman et al., 2014; Robinne et al., 2021; Silverman et al., 2019; The Nature Conservancy & Gunnison Climate Working Group, 2017; Uhlmann et al. 2020; Vanderhoof y Burt, 2018; Wilson y Norman, 2018                                                                                            |
| <i>Escasez de agua</i>           | Los INATS promueven la disponibilidad de agua superficial, el subsuelo, los flujos hiporreicos y la recarga a través de la captura, el almacenamiento y la liberación segura. Aumentan la función hidrológica general de los canales, lo que les ayuda a resistir las reducciones en la disponibilidad de agua y les ayuda a recuperarse cuando se produce una reducción. | 2.2.1. Aumenta la disponibilidad de agua                                                                                                                                                      | Fairfax y pequeño, 2018; Fairfax y Whittle, 2020; C. Fandel et al., 2016; CA Fandel, 2016; Gibson y Olden, 2014; Gurnell, 1998; normando, 2020, 2021b; Robinne et al., 2021; Silverman et al., 2019; The Nature Conservancy & Gunnison Climate Working Group, 2017; Uhlmann et al. 2020; Vanderhoof y Burt, 2018; Wilson y Norman, 2018 |
| <i>Inundación</i>                | Los INATS ayudan a regular las inundaciones de tamaño pequeño a mediano y retienen los contaminantes NPS.                                                                                                                                                                                                                                                                 | 2.2.4. Controle la escorrentía de aguas pluviales y filtre el agua                                                                                                                            | normando, 2020, 2021b; Norman, Huth, et al., 2010; Gurnell, 1998; Norman, Levick, et al., 2010; Robinne et al., 2021                                                                                                                                                                                                                    |
| <i>Olas de calor</i>             | Los INATS ayudan a reducir los impactos de las olas de calor mediante el aumento de la biomasa vegetal y el contenido de agua en la vegetación y en las estructuras rocosas, que brindan efectos refrescantes.                                                                                                                                                            | 2.2.3. Almacena C en los sumideros de carbono del agua del suelo donde crecen las plantas; y<br>2.2.6. Disminuye las Temperaturas y la Variabilidad Climática                                 | Norman et al., 2014; Wilson y Norman, 2019; Callegary et al., 2021; Norman et al., 2021; Silverman et al., 2019; Tosline et al., 2020; Webber et al. 2017                                                                                                                                                                               |
| <i>Tormentas de polvo</i>        | Los INATS aumentan la estabilidad del sitio y del suelo y pueden controlar la susceptibilidad de un paisaje a la erosión por el viento o el agua.                                                                                                                                                                                                                         | 2.2.2. Mantiene los sedimentos en su lugar y promueve la formación y productividad del suelo                                                                                                  | Gurnell, 1998; Norman y Niraula, 2016; Norman et al., 2017; Smith y Wischmeier, 1962                                                                                                                                                                                                                                                    |
| <i>Fuego fatuo</i>               | los INATS promueven sumideros de carbono, agua y suelo resistentes al fuego; crean áreas ribereñas más verdes/más húmedas con suelos saturados que son más difíciles de encender (cortafuegos), brindan refugio para la vida silvestre y su mayor biodiversidad ayuda a una recuperación más rápida después del incendio.                                                 | 2.2.1. aumenta la disponibilidad de agua; y<br>2.2.5. Aumenta la viabilidad de la vegetación                                                                                                  | Fairfax y Whittle, 2020; Goldfarb, 2020; normando, 2021a; Robinne et al., 2021; Silverman et al., 2019; Stockdale et al., 2019; Tensegridad, 2018; Wheaton, 2018                                                                                                                                                                        |
| <i>Pérdidas de biodiversidad</i> | INATS apoya ambientes de humedales claros y de movimiento lento que proporcionan viveros para múltiples organismos, incluidas plantas raras y únicas y vida acuática. Los aumentos en la vegetación brindan aún más la oportunidad de aprovisionamiento de hábitat y forraje para más especies.                                                                           | 2.2.5. aumenta la viabilidad de la vegetación; y<br>2.3.1. Aumenta la biodiversidad                                                                                                           | Davee et al. 2019; Geist y Hawkins, 2016; Gibbs, 2000; Gurnell, 1998; Naimán, et al. 1988; Norman et al., 2014; Pollock et al., 2003; Sabo et al., 2005; The Nature Conservancy y Gunnison Climate Working Group, 2017; Vanderhoof y Burt, 2018; Wilson et al., 2016; Wilson et al., 2021; Wilson y Norman, 2019                        |
| <i>inseguridad alimentaria</i>   | Los INATS se han utilizado para mejorar la seguridad alimentaria (agricultura y pastizales) durante más de mil años.                                                                                                                                                                                                                                                      | 2.2.1. Aumenta la disponibilidad de agua.<br>2.2.2. mantiene los sedimentos en su lugar y promueve la formación y productividad del suelo; y 2.2.5. Aumenta la viabilidad de la vegetación    | Buckley y Nabhan, 2016; Pescado y Pescado, 1984; Pescado et al., 2007; 2013; Gilberto, 2021; Howard y Griffiths, 1966; Leopoldo, 1937; normando, 2020; Wohl et al., 2019                                                                                                                                                                |

### 3.0. Ciclo de retroalimentación

La dirección y la magnitud de los ciclos de retroalimentación en el medio ambiente pueden dificultar o facilitar el almacenamiento de agua y la captura de carbono. Cuando se inicia un proceso desencadenante y comienza a construirse sobre sí mismo, puede responder una serie de procesos reaccionarios que pueden ser perjudiciales, causando degradación, o beneficiosos, conduciendo a la restauración. Temmink et al. (2022) revisaron investigaciones recientes sobre el papel de las retroalimentaciones recíprocas entre la geomorfología y la vegetación constructora de paisajes de turberas o humedales costeros y documentaron el potencial para interrumpir o restaurar estos procesos críticos. Describimos las similitudes de los humedales de agua dulce y las zonas ribereñas que se pueden dejar (para degradar) o tratar con INATS (para restaurar), con algunos ejemplos de cómo se ve eso en el paisaje.

#### 3.1 Degradación ribereña y de canales

Históricamente, los drenajes del suroeste de Estados Unidos sustentaron *ciénegas productivas*, pero estas se redujeron drásticamente a fines del siglo XIX y principios del XX debido al uso de la tierra y los cambios climáticos (Heffernan, 2008; Hendrickson y Minckley, 1985; Minckley, 2013, Minckley et al. 2013). Al mismo tiempo, las poblaciones de castores han disminuido drásticamente en los Estados Unidos y en otros lugares, eliminando su desarrollo hidrológico, geomórfico y biológico acumulativo y sustancial de humedales (Naiman et al., 1988; Pollock et al., 2003; Wohl, 2021). La degradación de *las ciénegas* provoca una conversión en pastizales y matorrales (Minckley et al., 2013), ya que las especies de humedales obligados ya no pueden sobrevivir cuando los niveles de agua subterránea descienden >25 cm por debajo de la superficie (Stromberg et al., 1996). Cuando se eliminan los castores de las praderas húmedas de castores, el paisaje a menudo vuelve a convertirse en pastizales relativamente secos, lo que reduce el almacenamiento de C a 40–100 Mg C/ha (Buringh, 1984; Wohl, 2013). Los pastizales secos son más receptivos a los incendios forestales a gran escala, cuya frecuencia cada vez mayor afecta la gravedad y la escala de la perturbación ribereña, lo que comúnmente cambia los arroyos afectados a un estado degradado (y emite CO<sub>2</sub>). En los ecosistemas de tierras secas, la vegetación escasa da como resultado horizontes de suelo poco desarrollados que están excesivamente expuestos a la lluvia. Tales condiciones favorecen el flujo superficial en lugar de la infiltración, aumentando la amplitud de las inundaciones (Villarreal et al., 2022). Dado que la disponibilidad de agua es un impulsor clave de los procesos microbianos en los ecosistemas áridos, la disminución de la humedad del suelo inhibe el ciclo de nutrientes mediado por microbios que ayuda a construir suelos (Belnap et al., 2005). Los reservorios establecidos de carbono orgánico en los ecosistemas ribereños de las tierras secas están influenciados por la cantidad, el momento y la intensidad de las precipitaciones y las inundaciones (Wohl, 2013). Las fuertes lluvias en paisajes degradados influyen en los procesos de erosión, las tasas de entrega y los mecanismos de transporte. La mayor pérdida de suelo asociada con eventos de precipitación de alta intensidad sugiere que unas pocas tormentas poco frecuentes pero de alta energía podrían determinar el impacto general de los eventos de erosión en el ciclo del C terrestre (Lal, 2004b). Los eventos de erosión pueden causar incisiones, con el descenso concomitante del lecho del arroyo y el acuífero aluvial (Gellis et al., 1991; Pollock et al., 2014). Combinado con sobreexplotaciones de agua subterránea, esto da como resultado una pérdida de conectividad entre el nivel freático y la zona de raíces (Minckley et al., 2013). La incisión del cauce generalmente es causada por factores extrínsecos, como el uso de la tierra (es decir, sobrepastoreo, remoción de presas) y el clima (mayores precipitaciones e intensidad), y

factores intrínsecos (es decir, aumento de la inclinación de la pendiente del valle) (Balling y Wells, 1990; Cooke y Reeves, 1976; Gellis et al., 1991; Leopold, 1951). Los estudios que examinaron el registro estratigráfico en los valles aluviales cortados por arroyos indicaron que el episodio de formación de arroyos del siglo XIX fue uno de los varios períodos de incisión del valle durante el Holoceno (Elliott et al., 1999; Haynes, 1968; Karlstrom y Karlstrom, 1986). Cuando los canales se cortan para formar arroyos, se produce una serie compleja de cambios denominados “ciclo del arroyo”, que progresan desde la incisión del canal hasta el ensanchamiento, la degradación y, finalmente, el llenado del canal y continúa río arriba a través de la cuenca (Patton y Schumm, 1981). Gran parte de la degradación de los ecosistemas fluviales resulta de la desconexión de procesos verticales, laterales y longitudinales (Ciotti et al., 2021).

El aumento de las temperaturas crea más aridez, lo que aumenta el riesgo de sequías calurosas (Overpeck y Udall, 2020). Los cambios climáticos afectan las concentraciones de vapor de agua en la atmósfera, las nubes, los patrones de precipitación y los patrones de escorrentía y flujo de corrientes (Graham et al., 2010). Las condiciones de sequía reducen la disponibilidad de agua en los suelos, lo que puede provocar la muerte de la vegetación a gran escala (Breshears et al., 2005). A medida que los suelos se secan, hay menos agua para evaporar, por lo que la radiación solar calienta aún más el suelo (Borunda, 2021). Los climas más secos y cálidos promueven el desarrollo de la macroporosidad de la capa superficial, junto con sus efectos desproporcionados sobre la conductividad hidráulica saturada, lo que puede alterar aún más la distribución de la humedad del suelo y afectar los procesos hidrológicos relacionados, como la evapotranspiración (Hirmas et al., 2018).

La evapotranspiración terrestre puede afectar la precipitación y el flujo de calor latente asociado ayuda a controlar las temperaturas de la superficie, con implicaciones importantes para las características climáticas regionales, como la intensidad y la duración de las olas de calor (Jia et al., 2018). El aire más caliente también significa que es más probable que la precipitación que llega caiga en forma de lluvia que de nieve o derrita la nieve que cae, eliminando la capa de nieve crítica en las altas montañas que almacena la precipitación invernal y extiende su estacionalidad (Huning y AghaKouchak, 2020; Martin et al., 2020). A medida que se instalan los INATS, el castor puede degradar la estructura y la función de la vegetación (Naiman et al., 1988) y los profesionales de la restauración (Wilson y Norman, 2018b). Humedales anaeróbicos tienen el potencial de aumentar las emisiones de  $\text{CH}_4$  (Moritsch et al., 2021) y los estanques de castores boreales tienen altas tasas de flujos de  $\text{CH}_4$  y  $\text{CO}_2$  (Johnston, 2014). Estos procesos del paisaje promueven las emisiones de C.

### 3.2 Restauración de riberas y canales

Las tendencias de degradación de la aridificación se pueden revertir para restaurar los procesos naturales regenerativos y los circuitos de retroalimentación instalando INATS nuevamente en el paisaje (Ciotti et al., 2021; Lal, 2015; Norman, 2020; Pollock et al., 2014; Silverman et al., 2019); Wheaton et al., 2019; Wohl et al., 2005). La instalación de INATS en ecosistemas ribereños de tierras secas puede restaurar humedales o crear sumideros de carbono en el suelo y el agua, y nutre un ciclo de hidratación y un ecosistema autosuficiente. La evolución del canal se puede frenar y los barrancos se pueden controlar usando INATS (Gellis, 1998; Schumm, 1985). Los INATS capturan y retienen los sedimentos y crean ambientes similares a humedales que ayudan

a equilibrar las emisiones y atraen el C heredado nuevamente al suelo al recolectar desechos orgánicos, enterrar el carbono orgánico del suelo y asegurarlo en estas piscinas similares a humedales (Naiman et al., 1988).

Los INATS aumentan la resistencia al flujo, atrapan sedimentos, provocan una degradación que restaura los sistemas fluviales y facilita el crecimiento vegetativo y la longevidad, lo que aumenta aún más la resistencia al flujo (Norman et al., 2014; Ponce y Lindquist, 1990). La conservación del suelo, el control de la erosión y la restauración de suelos erosionados son prácticas climáticamente inteligentes (Lal, 2014).

Los INATS retienen agua y la almacenan debajo del lecho del río, mejoran estos intercambios cercanos a la superficie donde se encuentran las aguas subterráneas y superficiales (flujos laterales en la zona hiporreica) y dan como resultado un almacenamiento en bancos que libera agua durante los períodos secos en las tierras áridas (Westbrook et al., 2006). El almacenamiento y la redistribución del agua están en función del espacio poroso del suelo y la distribución del tamaño, por lo que el desarrollo de la macroporosidad está más influenciado por el clima (Kutílek, 2004). El aumento de la disponibilidad de agua desencadena la fijación de C y N, lo que da como resultado un aumento de la biomasa vegetal, los agregados del suelo, la rugosidad de la superficie del suelo y la estabilidad del suelo, todo lo cual estimula los vínculos de retroalimentación (Belnap et al., 2005). La mayor disponibilidad de agua y productividad del suelo asociada con INATS contribuye al establecimiento de la vegetación (Gerencia de Restauración Forestal, 2018).

El aumento de la vegetación en INATS protege aún más contra la erosión y promueve la formación y la salud del suelo. Las plantas ayudan a acelerar el desarrollo del suelo acumulando MO en la superficie, modificando el suelo que rodea las raíces de las plantas y facilitando la presencia de microorganismos del suelo, además de sacar C de la atmósfera y almacenarlo en el suelo (Jacoby et al., 2017). Diversas comunidades de plantas nativas retienen el agua en su lugar, lo que le permite penetrar y filtrar el agua subterránea. El crecimiento de la vegetación está respaldado por INATS en la parte superior del suelo y por las raíces profundas que se producen debajo de la superficie del suelo que interactúan con las colonias de hongos compuestas de micelio y almacenan C.

Silverman et al. (2019) encontró que a medida que maduraban los proyectos de restauración que usaban INATS, los aumentos resultantes en la productividad eran evidentes durante períodos más largos en el ciclo anual, lo que sugiere un patrón de sucesión hacia la recuperación. A medida que aumenta la productividad de los suelos, también aumenta su capacidad para regular el agua a través de la percolación, la filtración, el almacenamiento y la redistribución, que pueden enfriar los microclimas y mejorar la capacidad de sumidero de C de los suelos (Lal, 2004b). Es probable que el C orgánico se retenga en los casos en que los suelos permanezcan saturados y tengan bajas concentraciones de oxígeno; condiciones similares a los suelos de los humedales (Pollock et al., 2014). La actividad biológica en el suelo está determinada por una combinación compleja de factores, incluidas las condiciones ambientales como la temperatura y la humedad y la proximidad a la vegetación viva (Rango et al., 2006). Más humedad atmosférica crea presión atmosférica que se alivia a través de la precipitación (Trenberth, 2011). En ambientes con agua limitada, los INATS respaldan la productividad de las plantas y la humedad



del suelo al hacer que el agua esté disponible durante temporadas de crecimiento más largas (Norman et al., 2016, 2014; Silverman et al., 2019). Más agua durante más tiempo rehabilita la capa freática de un humedal, que tiene el potencial de almacenar y secuestrar C en el suelo (Limpert et al., 2020). Se utilizaron estructuras rocosas para tratar pastizales degradados y se encontró potencial para aumentar la humedad del suelo y el ciclo de nutrientes (Martyn et al. 2022). Debido al aumento de la humedad, el INATS puede reducir los riesgos de incendios forestales en el paisaje. (Fairfax y Small, 2018; Stockdale et al., 2019). Todos estos procesos del paisaje promueven la reducción del C atmosférico.

### 3.3 Ejemplo de ciclo de degradación y ciclo de restauración en cuencas vecinas

Las fotografías de un estudio de cuencas pareadas (Norman et al., 2016; Norman y Niraula, 2016) muestran los procesos hidrogeomorfológicos y biogeoquímicos naturales y cómo los afecta el INATS (Figura 5). La cuenca de control muestra suelo desnudo y lecho rocoso, adoquines grandes, cárcavas profundas y raíces expuestas; este sistema está perdiendo agua y C (Figuras 5a y 5b). La cuenca adyacente, tratada con >2000 INATS hace 30 años, representa un canal más exuberante y verde, sin lecho rocoso ni raíces expuestas, pero en su lugar, los sumideros de carbono del agua del suelo sostienen la vegetación en el canal, sus sistemas de raíces y su estacionalidad; este sistema secuestra C y almacena agua para un uso prolongado (Figuras 5c y 5d). Cargas de sedimentos ricos y profundos llenan el canal en charcos escalonados, que promueven la productividad de la vegetación ribereña y la longevidad del crecimiento que simplemente no existiría de otra manera. El INATS crea una sucesión de estos ambientes similares a humedales, arriba y abajo del canal, con evidencia de una mayor extensión espacial y temporal de la saturación. La instalación de INATS puede revertir la degradación y la desertificación de los paisajes al restaurar los procesos hidrogeomórficos y biogeoquímicos.

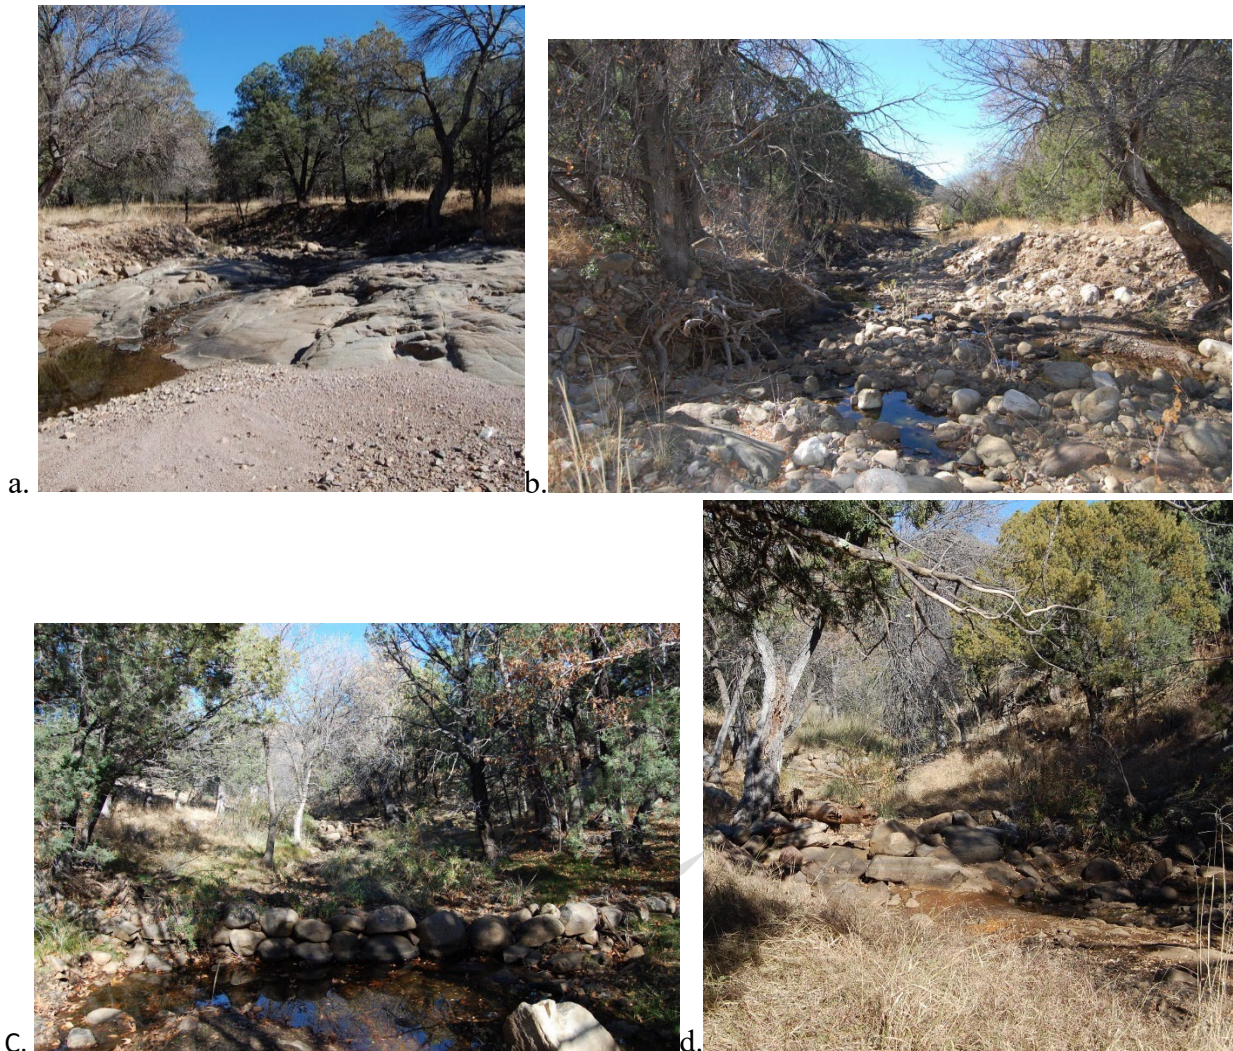

*Figura 5 . Fotografías de cuencas pareadas, una sin infraestructura natural para arroyos de tierras secas (INATS): a.) mirando río abajo; b.) y mirando río arriba; y c.) mirando río arriba y la cuenca adyacente con más de 2000 INATS y d.) mirando río abajo (todas las fotos de Jeremiah Liebowitz, 29 de noviembre de 2021).*

#### **4.0. Discusión**

Los agricultores de permacultura modernos, los recolectores de agua y los profesionales de la restauración se inspiran en la agricultura indígena y han identificado los beneficios de la desaceleración de los flujos, el compostaje del suelo y el reciclaje del agua en los invernaderos, para aumentar la biodiversidad nativa, la producción de alimentos y la refrigeración. Periodistas, cineastas, artistas y autores están desarrollando materiales para comunicar y compartir estas ideas y prácticas. Y organizaciones y empresas están creciendo y preparados para implementar prácticas de administración restaurativa basadas en esta floreciente comunidad de práctica. Sin embargo, todavía existe cierta confusión sobre los tipos de prácticas, impactos y aplicaciones en ecosistemas áridos y semiáridos, lo que hace que las instalaciones de estructuras de detención de roca o madera y los esfuerzos de reubicación de castores estén altamente regulados, a veces

disputados y, a menudo, rechazados debido a la falta de consenso en la comunidad científica con respecto a los impactos de la educación documentada (Pfaeffle et al., 2022).

Sintetizamos décadas de nuestra propia investigación aquí, junto por primera vez, con muchas otras referencias científicas notables, para proporcionar una base científica autorizada que pueda promover el aprendizaje, aumentar la administración de la restauración y catalizar un cambio de paradigma que reconozca a INATS como SbN para tantos. riesgos hidrometeorológicos que enfrenta el mundo actual. Presentamos pruebas técnicas y fácticas cada vez mayores, así como datos cuantitativos que hemos recopilado, para resaltar la facilidad, los beneficios, la replicabilidad y las precauciones de INATS. Esta revisión resume décadas de investigación que prueban el conocimiento tradicional, la intuición, la lógica y la experiencia en el terreno, utilizando métodos científicos que pueden y han sido reproducidos de manera transparente, y que han demostrado ser consistentes. Compartimos nuestros hallazgos comunes de que los INATS crean sumideros de carbono en el suelo y el agua o ecosistemas de humedales, y promoverlos como mejores prácticas de manejo en ecosistemas ribereños de tierras secas, para revertir la degradación de la tierra y las cuencas hidrográficas y promover procesos naturales, regenerativos y sostenibles como una forma viable de combatir el cambio climático.

#### 4.1. Advertencias

Las expectativas sociales y políticas de restauración a menudo no coinciden con la realidad (Geist y Hawkins, 2016; Pfaeffle et al., 2022). Este artículo analiza ampliamente el potencial de INATS para crear entornos similares a humedales que tienen impactos positivos sustanciales en el desarrollo de sumideros de C y el almacenamiento de agua, pero existen muchas condiciones para considerar la implementación. No existe una panacea única para la restauración de ríos en tierras secas. Los beneficios que se cuentan en este manuscrito dependen del lugar y del tiempo, y definitivamente no están garantizados, pero si podemos cambiar el enfoque para comprender los procesos que se pueden nutrir mediante la instalación de INATS, combinado con algunas limitaciones intuitivas, puede ayudar a garantizar su éxito. Es importante considerar la perturbación inicial asociada con la instalación de INATS, que depende del sitio y del tamaño. Por ejemplo, los gaviones grandes pueden requerir el uso de máquinas para mover materiales, lo que tendrá impactos negativos a corto plazo ya que los paisajes tardan en recuperarse (Gerencia de Restauración Forestal, 2018; Wilson y Norman, 2018). Además, cuando las estructuras están extremadamente secas, la respuesta de escorrentía se retrasará a medida que se vuelven a humedecer y, en el caso de lluvias muy ligeras, es posible que no alcancen la saturación y reciban todos los beneficios asociados (Norman et al., 2016). También es importante considerar: (i.) la ubicación y escala del proyecto que se está considerando; (ii.) conocimiento basado en la práctica que se emplea, planificación y guías; (iii.) mantenimiento y seguimiento de la restauración para la gestión adaptativa; y (iv.) permitir cierta variabilidad natural.

##### 4.1.1. Consideraciones de ubicación y escala

Se ha propuesto un diseño basado en procesos para abordar las causas de la degradación (Beechie et al. 2010), que debe basarse en parámetros fundamentales de espacio, energía, materiales y tiempo (Ciotti et al., 2021). Si los INATS se usan o colocan de manera incorrecta, pueden ser destructivos para las zonas ribereñas existentes y, a veces, pueden pasar largos períodos de tiempo antes de que los efectos de la acción de manejo se vuelvan visibles, por lo que las investigaciones deben ser de amplio alcance (DeBano y Heede, 1987). Es importante

comprender la geomorfología del paisaje previo a la instalación antes de implementar o evaluar los efectos (Johnston, 2014). Y del mismo modo, es importante comprender el alcance de la degradación cuando se considera la restauración (Reinert et al., 2022). Por ejemplo, comprender el ciclo del arroyo y la etapa (o estado) del canal y los elementos de las tierras altas fue un primer paso importante para la colocación de presas de tierra o estructuras de roca y maleza en la Reservación Indígena Zuni, Nuevo México (Gellis, 1998; Gellis et al., 1995). Para ser sostenible e iniciar los procesos naturales exitosos, INATS debe imitar el entorno natural tanto como sea posible, ya sea que los humanos construyan APC y presas de una roca o se asocien con castores (Wheaton et al., 2019).

La mayoría de los proyectos de restauración son demasiado pequeños y aislados para abordar la degradación a escala de cuencas hidrográficas (Bernhardt y Palmer, 2011). Beechie et al. (2010) recomienda que la escala de restauración coincida con la escala de los procesos que busca abordar. Las estrategias más grandes de restauración de arroyos a escala de paisaje que incorporan colecciones y series de instalaciones INATS, en múltiples afluentes, de un sistema fluvial o cadena montañosa tienen más potencial para tener éxito. Los prados de castores escalonados que ocurren naturalmente son complejos espacialmente extensos de múltiples presas y estanques en diferentes estados de actividad o abandono (Wohl et al., 2019). Asimismo, en áreas donde las estructuras históricas de detención de rocas son más abundantes, su efecto sobre la escorrentía local y la hidrología es profundo (Howard y Griffiths, 1966). Debido a la instalación de presas de castores y APC en multitudes en el noroeste del Pacífico de los Estados Unidos, se refuerza la resiliencia general del sistema y en el potencial de fallas (es decir, explosiones), los impactos no se consideran catastróficos (Pollock et al., 2014). Aunque los esfuerzos a gran escala son más radicales de considerar, son factibles y los beneficios ciertamente pueden superar los costos. Por ejemplo, The Nature Conservancy instaló más de 750 presas de una roca en sus esfuerzos por la rehabilitación del urogallo (The Nature Conservancy, Gunnison Climate Working Group, 2017). Los miembros de Borderlands Restoration Network han instalado más de 1000 presas de contención en Patagonia, AZ. Cuenca los Ojos instaló más de 2000 presas de control en la cuenca de 769 ha de Turkey Pen, sureste de AZ (Callegary et al., 2021; Norman et al., 2016; Norman y Niraula, 2016).

#### **4.1.2. Conocimiento basado en la práctica, planificación y guías**

La restauración de cuencas hidrográficas es más efectiva cuando los profesionales experimentados están instalando una estrategia basada en las necesidades y definiendo objetivos y objetivos, en lugar de agregar estructuras al azar al paisaje (Norman et al., 2022). El tipo de INATS depende de las preferencias del propietario de la tierra, los resultados deseados, el régimen de mantenimiento y sostenibilidad deseado y los aspectos de ubicación. Los profesionales de la restauración y los científicos han desarrollado guías para ayudar a mejorar la tasa de éxito de la instalación de INATS. Se describen medidas específicas de tratamiento para la instalación de gaviones, vertederos de fugas y diques de contención de malezas, troncos y rocas sueltas para las instalaciones de planificación (Gerencia de Restauración Forestal, 2018; Geyik, 1986). También se pueden considerar otras estructuras que ofrecen la promesa de estos mismos entornos similares a los humedales, como los métodos de tipo 'estanque y tapón' (también conocido como enfoque de 'prioridad 1') (Hammersmark et al., 2008; Rosgen, 1997). Los profesionales de la restauración que instalan presas de una roca pueden seguir las pautas (Zeedyk y Clothier, 2009). El modelo de evaluación y base de datos de la dinámica de la mermelada de

madera (WoodDDAM) es una herramienta para comprender y predecir los cambios en la mermelada de madera a lo largo del tiempo (Wohl et al., 2019). Y la Restauración de paisajes fluviales basada en procesos de baja tecnología (Low Tech PBR (Wheaton et al., 2019) ) y otros manuales brindan pautas para iniciar la restauración basada en procesos (como APC) en paisajes fluviales estructuralmente escasos (Bureau of Reclamation y US Army Centro de Investigación y Desarrollo de Ingenieros y ERDC, 2016; Pollock et al., 2018; Scott et al., 2019).

#### 4.1.3. Mantenimiento, Monitoreo y Gestión Adaptativa

El mantenimiento de las estructuras y su vida útil no se detalla en este artículo de revisión, pero es fundamental cuando se piensa en INATS. Algunas estructuras, como las presas de castores y los análogos de las presas de castores, tienen una vida útil natural que va desde una sola temporada hasta más de 100 años, según el entorno ambiental físico (Laurel y Wohl, 2019; Pilliod et al., 2018). Las presas de castores naturales y los APC se instalan como características temporales en el paisaje, con la intención de invocar una respuesta de proceso, no para permanecer como estructuras permanentes (Pollock et al., 2014). Estas estructuras están diseñadas para ser transitorias a nivel individual, pero a escala de paisaje son más efectivas cuando se alternan consistentemente entre estados activos/inactivos durante 100 a 1000 años (Naiman et al., 1988). Por ejemplo, la magnitud potencial del almacenamiento de C asociado con estructuras individuales o múltiples en relación con las reservas de carbono locales, regionales o globales puede ayudar a las personas a comprender los efectos de este tipo de restauración. Las estructuras de detención de rocas, por otro lado, a menudo se construyen con una vida útil prevista más larga, para promulgar procesos y, en última instancia, enterrarse. Existen miles de estructuras de detención de rocas en América del Norte y han persistido durante siglos y milenios con muy poco o ningún mantenimiento (Norman, 2022). Y, afortunadamente, la mayoría de los INATS requieren un mantenimiento de muy bajo costo, lo que brinda grandes beneficios cuando se instalan abundantemente (Wheaton et al., 2019).

Es probable que haya tantos INATS que hayan colapsado y fallado, aunque la falla es un término relativo. Si los INATS están enterrados, es posible que no funcionen activamente (p. ej., para capturar nuevos sedimentos), pero podrían ser parte del legado de los arroyos modernos que almacenan una cantidad sustancial de C orgánico (Walter y Merritts, 2008). Las grandes inundaciones que ocurren naturalmente pueden y deben poder movilizar las rocas utilizadas para construir algunos tipos de INATS. En algunos casos, el INATS colapsado aún puede mantener alguna función. Por ejemplo, los estanques de castores que se rompieron durante los flujos altos, aún retrasaron la transmisión de aguas abajo (Westbrook et al., 2020). Si bien los castores son bien conocidos por su creación y mantenimiento de humedales, también deberían ser reconocidos por su capacidad para preservarlos en tiempos de sequía (Fairfax y Small, 2018; Hood y Bayley, 2008). Tanto los profesionales del castor como los de la restauración pueden adaptar y adaptarán la gestión para reparar o reconstruir INATS después del daño (p. ej., cortes en los extremos, reventones o socavación) y emplearán estrategias progresivas para elevar la altura de una estructura, por lo general construyendo nuevas estructuras encima de la misma. los sumideros de suelo-agua-carbono creados aguas arriba del INATS (Pollock et al., 2018, 2014). Además, es importante señalar la necesidad de monitorear los impactos de la restauración de varias cuencas y canales (Palmer et al., 2007). Los hallazgos a menudo pueden funcionar de la mano para identificar dónde se necesita mantenimiento o pueden representar resultados inesperados pero extremadamente valiosos. Por ejemplo, los estudios de las presas de castores



las revelaron como ubicaciones de 'refugios seguros' verdes, donde, en promedio, la vegetación cerca de las presas se quemó tres veces menos que en áreas sin presas (Fairfax y Whittle, 2020). Asimismo, el monitoreo de la descarga a lo largo del tiempo en las presas de control reveló la capacidad de almacenamiento de agua del suelo que se está desarrollando en ellas (Norman et al., 2016). La planificación cuidadosa, la implementación y el mantenimiento y monitoreo apropiados a la estructura pueden aumentar el éxito y la resiliencia climática a largo plazo.

#### 4.1.4. Variabilidad

La variabilidad natural aumenta la incertidumbre de la magnitud y los patrones del calentamiento futuro, que cuando se considera con incertidumbre científica y/o del escenario puede confundir la formulación de políticas (Terando et al., 2020). Sin embargo, la estocasticidad es inherente a la funcionalidad ecológica y la restauración de cuencas; siempre hay resultados incontrollables o inciertos (Ciotti et al., 2021; Nash et al., 2021; Sutfin y Wohl, 2017). Con el reconocimiento del potencial para ayudar a proteger y restaurar los sistemas naturales utilizando SbN, para ayudar a eliminar cantidades significativas de C de la atmósfera en forma de CO<sub>2</sub> a medida que crecen las plantas, existe un movimiento para desarrollar mecanismos institucionales para abordar cuestiones de incertidumbre y escala de tiempo en la financiación. proyectos (Conservation International, 2020). Aunque los modelos y el monitoreo pueden proporcionar una comprensión básica de los procesos de la Tierra, sigue existiendo un potencial constante de error al predecir los resultados. Idealmente, la implementación puede permitir cierta flexibilidad para administrar de manera adaptativa las instalaciones de INATS y lograr soluciones SbN con los resultados más favorables (Nesshöver et al., 2017; Norman et al., 2022).

#### 4.2. Investigación futura

El potencial para continuar traduciendo la ciencia de la restauración en prácticas climáticamente inteligentes, identificando políticas económicas y públicas y mercados internacionales, y llevando INATS a estas arenas es fundamental para que INATS se emplee a gran escala. Los científicos del clima dentro de la comunidad de investigación internacional deben evaluar y mejorar las prácticas de gestión para informar a los tomadores de decisiones (Terando et al., 2020). Además, cuando los gobiernos miden los costos y beneficios de tomar una decisión de inversión, necesitan una ciencia rigurosa para documentar los impactos de sus elecciones en los valores sociales (culturales y espirituales), económicos y ambientales (Tye et al, 2022). Los especialistas en conservación, los profesionales de la restauración, los administradores de tierras y los educadores pueden desempeñar un papel importante al brindar experiencia sobre las innovaciones de restauración del INATS a los propietarios de tierras para promover la conectividad de las llanuras aluviales y mejorar la resiliencia ecológica en las vías fluviales degradadas (Fairfax y Whittle, 2020; Norman et al., 2022)., 2021a; Pollock et al., 2018; Wheaton et al., 2019; Wohl, 2021).

Se necesitan criterios de decisión para la conservación, el aprovechamiento de la recuperación natural, la restauración de la conectividad y la diversidad de hábitats, así como el desarrollo de una plantilla estructural geomorfológica para incluir procesos hidrodinámicos. Jones et al. (2017) desarrollaron un enfoque geoespacial para enfocar los esfuerzos de restauración y conservación, basado en la distribución espacial de las capacidades de almacenamiento de los humedales a escala de cuenca; esto proporciona información sobre los patrones de drenaje histórico para informar la restauración. Se utilizan modelos de cuencas hidrográficas que pueden ayudar a

ubicar estratégicamente los INATS para generar servicios ecosistémicos seleccionados, como detención de inundaciones (Norman et al. 2010a; 2010b), control de la erosión (Norman et al. 2017), resiliencia climática (Norman, 2021b) y recarga de aguas subterráneas (Norman et al. 2019), aunque se justifica notablemente más investigación sobre la respuesta geohidrológica al INATS. Villareal et al. (2022) identificar lugares donde INATS sería más beneficioso con base a una combinación de predicciones de modelos de incendios y cuencas hidrográficas. Del mismo modo, la restauración de castores puede orientarse a sitios adecuados, con mayor probabilidad de sustentar poblaciones de castores reintroducidos (Gurnell, 1998; Pollock et al. 2014; Macfarlane et al., 2017; Scamardo et al., 2022). La investigación para comprender cómo maximizar los beneficios de las instalaciones INATS y planificar las cadenas más grandes y efectivas de sumideros de carbono-agua-suelo ahorrará recursos financieros y ambientales en el futuro.

Un desafío que enfrentamos es avanzar en esta nueva comprensión y teoría a través de disciplinas, para comunicar mejor los hallazgos de manera que tengan significado para que las personas, la cultura y la sociedad los adopten y tengan un impacto en el entorno global más amplio (Tye et al., 2022). Una sugerencia es utilizar el intercambio de mercado, la banca y los créditos de mitigación, los incentivos o las compensaciones para compensar las huellas de carbono o hídricas a través de servidumbres de restauración o conservación utilizando INATS (Norman, 2020; 2021a). La contabilidad precisa de los beneficios relacionados con INATS es vital para permitir su inclusión en los programas de compensación de carbono (Nahlik y Fennessy, 2016). En los ecosistemas de tierras secas, la baja humedad del suelo junto con la alta alcalinidad del suelo actúa para disminuir la disponibilidad de N y P del suelo, lo que afecta las formas de vida de las plantas del desierto y justifica una mayor investigación relacionada con INATS (He et al., 2015). Recomendamos realizar investigaciones para documentar la ocurrencia, la estructura y los impactos de las costras biológicas del suelo relacionadas con el clima y las perturbaciones en el INATS.

Modelar el destino y el transporte de sedimentos, combinado con modelos de estado y transición, puede representar diferentes resultados de C con y sin INATS. Es importante documentar la investigación que estudia las emisiones gaseosas de las tierras ribereñas tratadas con INATS y aquellas que no las tienen, midiendo las emisiones de metano y óxido nitroso. Necesitamos comprender mejor la ganancia neta de C por INATS (sumidero neto o productividad primaria neta frente a bruta) y determinar con el tiempo si se emite C (a través de la metanogénesis) o se vuelve a secuestrar en INATS después de que se produce la erosión. Esta investigación para comprender el ciclo del C, mitigar los aumentos en el CO<sub>2</sub> atmosférico y respaldar las transformaciones biogeoquímicas críticas a nivel mundial utilizando INATS requerirá documentar y luego desacoplar el agua, el nitrógeno, el fósforo, el azufre y otros procesos. Nuestra hipótesis es que el ciclo acoplado entre estos y los otros procesos que hacen que el C regrese a la atmósfera fortalecería aún más la contribución de INATS.

Se necesita más de una investigación para representar el potencial de las existencias de C del suelo INATS a lo largo del tiempo, identificando los límites superiores y los determinantes, para definir la capacidad de sumidero del COS a diferentes escalas, incluidas las estimaciones de SIC y de la biomasa C (superficial y subterránea) para apoyar la inclusión en programas de compensación de carbono. También se justifica una mayor investigación sobre el presupuesto de



C del suelo y los estudios de componentes para comparar los impactos de INATS con el balance de masa, el entierro de C del suelo y los flujos laterales en los humedales (Johnston, 2014; Krauss et al., 2018; Naiman et al., 1988). Las existencias totales de carbono en el suelo en las tierras secas comprenden una mayor cantidad de SIC que en las regiones húmedas y subhúmedas. Por lo tanto, la evaluación de la formación de carbonatos secundarios en las zonas ribereñas es esencial para determinar el impacto sobre el almacenamiento total de carbono y el secuestro de SIC por procesos bióticos y abióticos. No se puede exagerar la importancia de la formación de carbonatos secundarios y el secuestro de SIC y se necesita investigación adicional.

## **5.0. Conclusiones**

La restauración de las tierras secas requiere la revitalización hidrogeomorfológica y biogeoquímica natural de ciclos y fortalecer los ciclos de retroalimentación positiva incrustados en ellos. El primer paso crítico para iniciar una restauración exitosa en las cuencas hidrográficas de tierras secas es frenar el rápido drenaje de agua del paisaje mediante la restauración de la infraestructura natural en ambientes fluviales. Las estructuras de roca, madera o lodo hechas por castores y por el hombre son de infraestructura natural en los arroyos de tierras secas (INATS) que pueden transformar las áreas ribereñas secas en canales escalonados de sumideros de carbono, agua y suelo similares a los humedales. Esta solución basada en la naturaleza no es necesariamente costosa y se puede practicar con una ingeniería y un diseño técnicos mínimos. Nuestra investigación destaca el potencial para revertir la degradación y restablecer los ciclos de retroalimentación naturales en los esfuerzos de restauración a gran escala de cuencas hidrográficas. La implementación generalizada de INATS podría tener efectos significativos en los ciclos globales del agua y del carbono, ayudar a mitigar el cambio climático adicional a través del secuestro de carbono, apoyar el desarrollo sostenible y hacer que los ecosistemas de tierras secas sean más resistentes a las perturbaciones relacionadas con el clima.

## **Agradecimientos**

Los autores agradecen los aportes, la conversación, las revisiones y la consideración de sus colegas, incluidos los Dres. D. Phillip Guertin, H. Ron Pulliam, Michele Girard, David Goodrich, James B. Callegary, Miguel L. Villarreal, Julio L. Betancourt, Joel B. Sankey y Ken W. Krauss, así como Walter Jehne, Deborah J. Tosline, Natalie R. Wilson, Hanna Coy, Andrew F. Bennett, Josiah T. Austin y Valer Austin Clark. Traducido usando Google Translate y revisado con la ayuda de la Sra. Alba Sofia (¡Go English!). Cualquier uso de nombres comerciales, de empresas o de productos es únicamente con fines descriptivos y no implica la aprobación por parte del gobierno de los EE. UU.

## **Declaración de Conflicto de Intereses**

El(los) autor(es) declaró(n) que no existe(n) ningún conflicto de interés potencial con respecto a la investigación, autoría y/o publicación de este artículo.

## **Fondos**

El (los) autor (es) declararon haber recibido el siguiente apoyo financiero para la investigación, autoría y/o publicación de este artículo: La financiación de este documento se proporcionó a través del Estudio de recolección de agua de tierras áridas, parte del Programa Nacional de Imágenes de Tierras, en el Centro Área de Misión de Sistemas Científicos del Servicio Geológico de EE. UU. (USGS).

## Lista de Abreviaciones

|                  |                                                         |
|------------------|---------------------------------------------------------|
| APC              | Análogos de Presas de castores                          |
| C                | Carbón                                                  |
| C <sub>4</sub>   | Metano                                                  |
| CIS              | Carbono inorgánico del suelo                            |
| cm               | Centímetro                                              |
| CO <sub>2</sub>  | dióxido de carbono                                      |
| COS              | Carbono orgánico del suelo                              |
| GEI              | Emisiones de gases de efecto invernadero                |
| ha               | Hectárea                                                |
| INATS            | Infraestructura natural en arroyos de tierras secas     |
| metro            | Metro                                                   |
| Mg               | Megagramo (10 <sup>6</sup> gramos = 1 tonelada métrica) |
| MO               | Materia orgánica                                        |
| N                | Nitrógeno                                               |
| N <sub>2</sub> O | Óxido nitroso                                           |
| NDVI             | Índice de vegetación de diferencia normalizada          |
| O                | Oxígeno                                                 |
| Pg               | Petagrama                                               |
| SbN              | Soluciones basadas en la naturaleza                     |
| Tg               | Teragramo                                               |

## Referencias

- Adams, DK, Comrie, AC, 1997. El monzón de América del Norte. *Boletín de la Sociedad Meteorológica Estadounidense* 78, 2197–2213. [https://doi.org/10.1175/1520-0477\(1997\)078%3C2197:TNAM%3E2.0.CO;2](https://doi.org/10.1175/1520-0477(1997)078%3C2197:TNAM%3E2.0.CO;2)
- AghaKouchak, A., Sorooshian, S., Hsu, K., Gao, X., 2013. El potencial de la detección remota de precipitaciones para la evaluación de la vulnerabilidad de los recursos hídricos en el sudoeste árido de Estados Unidos, en: *Vulnerabilidad climática*. Elsevier, págs. 141–149. <https://doi.org/10.1016/B978-0-12-384703-4.00512-8>
- Allen, CD, Macalady, AK, Chenchouni, H., Bachelet, D., McDowell, N., Vennetier, M., Kitzberger, T., Rigling, A., Breshears, DD, Hogg, E., otros, 2010 Un panorama global de la mortalidad de los árboles inducida por la sequía y el calor revela los riesgos emergentes del cambio climático para los bosques. *Ecología y gestión forestal* 259, 660–684. DOI: 10.1016/j.foreco.2009.09.001
- Arnold, JG, Kiniry, JR, Srinivasan, R., Williams, JR, Haney, EB, Neitsch, SL, 2012. Documentación de entrada/salida de la herramienta de evaluación de suelos y agua Versio 2012 (No. TR-439). Instituto de Recursos Hídricos de Texas. <https://swat.tamu.edu/media/69296/swat-io-documentation-2012.pdf>
- Badiou, P., McDougal, R., Pennock, D., & Clark, B. (2011). Greenhouse gas emissions and carbon sequestration potential in restored wetlands of the Canadian prairie pothole region. *Wetlands Ecology and Management*, 19(3), 237–256. <https://doi.org/10.1007/s11273-011-9214-6>
- Balling, RC, Wells, SG, 1990. Patrones históricos de lluvia y actividad de los arroyos dentro de la cuenca de drenaje del río Zuni, Nuevo México. *Anales de la Asociación de Geógrafos Estadounidenses* 80, 603–617. <https://doi.org/10.1111/j.1467-8306.1990.tb00320.x>
- Beechie, TJ, Sear, DA, Olden, JD, Pess, GR, Buffington, JM, Moir, H., Roni, P. y Pollock, MM, 2010. Principios basados en procesos para restaurar ecosistemas fluviales. *Biociencia*, 60 (3), 209–222. <https://doi.org/10.1525/bio.2010.60.3.7>
- Belnap, J., Welter, JR, Grimm, NB, Barger, N., Ludwig, JA, 2005. Vínculos entre procesos microbianos e hidrológicos en cuencas hidrográficas áridas y semiáridas. *Ecología* 86, 298–307. <https://doi.org/10.1890/03-0567>
- Bernhardt, ES, Palmer, MA, 2011. Restauración de ríos: la lógica difusa de reparar alcances para revertir la degradación a escala de la cuenca. *Aplicaciones ecológicas* 21, 1926–1931. <https://doi.org/10.1890/10-1574.1>
- Bogan, MT, Lytle, DA, 2011. La sequía severa impulsa nuevas trayectorias comunitarias en las piscinas de los arroyos del desierto: la sequía provoca cambios en el régimen comunitario. *Biología de agua dulce* 56, 2070–2081. <https://doi.org/10.1111/j.1365-2427.2011.02638.x>
- Borunda, A., 2021. La 'mega sequía' persiste en el oeste de EE. UU., mientras se desarrolla otro año extremadamente seco; El tramo seco de larga duración rivaliza con cualquier cosa en los últimos 1200 años, un signo de "aridificación" inducida por el cambio climático. *Entorno Geográfico Nacional*. <https://www.nationalgeographic.com/environment/article/megadrought-persists-in-western-us-as-another-extremely-dry-year-develops>
- Bouwes, N., Weber, N., Jordan, CE, Saunders, WC, Tattam, IA, Volk, C., Wheaton, JM, Pollock, MM, 2016. El experimento del ecosistema revela los beneficios de las presas de castores naturales y simuladas para una amenazada población de trucha arco iris (*Oncorhynchus mykiss*). *Informe científico* 6, 28581. <https://doi.org/10.1038/srep28581>
- Breshears, DD, Cobb, NS, Rich, PM, Price, KP, Allen, CD, Balice, RG, Romme, WH, Kastens, JH, Floyd, ML, Belnap, J., Anderson, JJ, Myers, OB, Meyer, CW, 2005. Muerte regional de la vegetación en respuesta a la sequía del tipo del cambio global. *Actas de la Academia Nacional de Ciencias* 102, 15144–15148. <https://doi.org/10.1073/pnas.0505734102>

- Briggs, MK, Osterkamp, WR (Eds.), 2021. Renovación de nuestros ríos: Restauración de corredores de arroyos en regiones de tierras áridas. Prensa de la Universidad de Arizona, Tucson, AZ, EE. UU. ASIN: B08PK92QY4
- Brouwer, J., Fitzpatrick, RW, 2002. Restricción de capas, trayectorias de flujo y correlación entre la duración de la saturación del suelo y las características morfológicas del suelo a lo largo de una ladera con un régimen hídrico del suelo alterado en el oeste de Victoria. *Revista australiana de investigación del suelo* 40, 927. <https://doi.org/10.1071/SR02009>
- Buckley, S., Nabhan, GP, 2016. Restauración de la cadena alimentaria para polinizadores: estrategias regionales de recuperación de hábitats que involucran áreas protegidas del suroeste. *Revista de áreas naturales* 36, 489–497. <https://doi.org/10.3375/043.036.0414>
- Buffington, JM, Tonina, D., 2009. Intercambio hiporreico en ríos de montaña II: efectos de la morfología del canal en la mecánica, escalas y tasas de intercambio: morfología del canal e intercambio hiporreico. *Brújula de geografía* 3, 1038–1062. <https://doi.org/10.1111/j.1749-8198.2009.00225.x>
- Bull, WB, 1997. Flujos efímeros discontinuos. *Geomorfología* 19, 227–276. [https://doi.org/10.1016/S0169-555X\(97\)00016-0](https://doi.org/10.1016/S0169-555X(97)00016-0)
- Oficina de Reclamación y Centro de Investigación y Desarrollo de Ingenieros del Ejército de EE. UU., ERDC, 2016. Manual Nacional de Madera Grande: Evaluación, planificación, diseño y mantenimiento de madera grande en ecosistemas fluviales: proceso de restauración, función y estructura. Oficina de Recuperación de EE. UU. y Centro de Investigación y Desarrollo de Ingenieros del Ejército de EE. UU. [https://www.usbr.gov/research/projects/download\\_product.cfm?id=1481](https://www.usbr.gov/research/projects/download_product.cfm?id=1481)
- Bedard-Haughn, A., Jongbloed, F., Akkerman, J., Uijl, A., de Jong, E., Yates, T., & Pennock, D. (2006). The effects of erosional and management history on soil organic carbon stores in ephemeral wetlands of hummocky agricultural landscapes. *Geoderma*, 135, 296–306. <https://doi.org/10.1016/j.geoderma.2006.01.004>
- Buringh, P., 1984. El papel de la vegetación terrestre en las mediciones del ciclo global del carbono mediante sensores remotos Editado por: Woodwell GM. John Wiley, Nueva York. [https://scope.dge.carnegiescience.edu/SCOPE\\_23/SCOPE\\_23\\_3.1\\_chapter3\\_91-109.pdf](https://scope.dge.carnegiescience.edu/SCOPE_23/SCOPE_23_3.1_chapter3_91-109.pdf)
- Bustamante, MMC, Silva, JS, Scariot, A., Sampaio, AB, Mascia, DL, Garcia, E., Sano, E., Fernandes, GW, Durigan, G., Roitman, I., Figueiredo, I., Rodrigues, RR, Pillar, VD, de Oliveira, AO, Malhado, AC, Alencar, A., Vendramini, A., Padovezi, A., Carrascosa, H., Freitas, J., Siqueira, JA, Shimbo, J., Generoso, LG, Tabarelli, M., Biderman, R., de Paiva Salomão, R., Valle, R., Junior, B., Nobre, C., 2019. La restauración ecológica como estrategia de mitigación y adaptación al clima cambio: lecciones y desafíos desde Brasil. *Mitig Adapt Strateg Glob Change* 24, 1249–1270. <https://doi.org/10.1007/s11027-018-9837-5>
- Butler, DR, Malanson, GP, 1995. Tasas y patrones de sedimentación en estanques de castores en un entorno montañoso. *Geomorfología* 13, 255–269. [https://doi.org/10.1016/0169-555X\(95\)00031-Y](https://doi.org/10.1016/0169-555X(95)00031-Y)
- Callegary, JB, Norman, LM, Eastoe, CJ, Sankey, JB, Youberg, A., 2021. Evaluación preliminar del potencial de secuestro de carbono y nitrógeno de los sedimentos derivados de incendios forestales almacenados por estructuras de control de erosión en ecosistemas forestales, suroeste de EE. UU. *Investigación de aire, suelo y agua* 14, 117862212110017. <https://doi.org/10.1177/11786221211001768>
- Caster, J., Sankey, T.Ts., Sankey, JB, Bowker, MA, Buscombe, D., Duniway, MC, Barger, N., Faist, A., Joyal, T., 2021. La biocorteza y el suelo superficie: Influencia del clima, la perturbación y la recuperación de la biocorteza en la rugosidad de la superficie del suelo. *Geoderma* 403, 115369. <https://doi.org/10.1016/j.geoderma.2021.115369>

- Ciotti, DC, Mckee, J., Pope, KL, Kondolf, GM, Pollock, MM, 2021. Criterios de diseño para la restauración basada en procesos de sistemas fluviales. *Biociencia* 71, 831–845.  
<https://doi.org/10.1093/biosci/biab065>
- Coes, AL, Pool, DR, 2005. Infiltración y recarga del canal de la corriente efímera y del piso de la cuenca en la subcuenca de Sierra Vista de la cuenca del Alto San Pedro, sureste de Arizona. Informe de archivo abierto del Servicio Geológico de EE. UU. 2005-1023 84.  
<https://pubs.er.usgs.gov/publication/ofr20051023>
- Conservación Internacional, 2020. Puntos críticos de biodiversidad; Inversión dirigida a los lugares más importantes de la naturaleza [Documento WWW]. URL  
<https://www.conservation.org/priorities/biodiversity-hotspots> (consultado el 5.10.22).
- Cooke, RU, Reeves, RW, 1976. Arroyos y cambio ambiental en el suroeste de Estados Unidos. Clarendon Press, Oxford.
- Coy, H., Norman, LM, Wilson, NR, Debenedetto, Geoffrey P., Bennett, AF, Vogel, J., Swetnam, T., Austin, JT, 2019. Evaluación del presupuesto hídrico en torno a la restauración de humedales “Leaky Weirs” en Ciénega Ranch, SE Arizona, EE. UU.
- Coy, HA, Wilson, NR, Bennett, AF, Hsieh, D., Norman, LM, 2021. Datos hidrológicos recopilados en Leaky Weirs, Cienega Ranch, Willcox, AZ (marzo de 2019 - octubre de 2020). Publicación de datos del Servicio Geológico de EE. UU. <https://doi.org/10.5066/P9OX6TT1>
- Davee, RR, Gosnell, H., Charnley, S., 2019. Uso de análogos de Beaver Dam para la recuperación de peces y vida silvestre en pastizales públicos y privados en el este de Oregón (documento de investigación n.º PNW-RP-612). Centro Climático del Noroeste del Departamento de Agricultura de los Estados Unidos, Estación de Investigación del Noroeste del Pacífico.
- Davis, TJ, 1993. Hacia el Uso Racional de los Humedales: Informe del Proyecto de Uso Racional de la Convención de Ramsar. Oficina de Convenciones de Ramsar, Gland, Suiza.
- De Groot, RS, Blignaut, J., Van Der Ploeg, S., Aronson, J., Elmqvist, T., Farley, J., 2013. Beneficios de invertir en la restauración de ecosistemas. *Biología de la conservación* 27, 1286–1293.  
<https://doi.org/10.1111/cobi.12158>
- DeBano, LF, Heede, BH, 1987. Mejora de los ecosistemas ribereños con estructuras de canales. *Revista JAWRA de la Asociación Estadounidense de Recursos Hídricos* 23, 463–470.
- Dessler, AE, 2010. Determinación de la respuesta de las nubes a partir de las variaciones climáticas durante la última década. *Ciencia* 330, 1523–1527. <https://doi.org/10.1126/science.1192546>
- Donavan, P., 2020. The Water-Harvesting Soil-Carbon Sponge [Documento WWW]. Grupo de Trabajo de Suelos Saludables de NM. URL <https://www.nmhealthysoil.org/2020/10/03/the-water-harvesting-soil-carbon-sponge/>
- East, AE, Sankey, JB, 2020. Efectos geomórficos y sedimentarios del cambio climático moderno: condiciones futuras actuales y anticipadas en el oeste de los Estados Unidos. *Rev. Geophys.* 58. <https://doi.org/10.1029/2019RG000692>
- Elliott, JG, Gellis, AC, Aby, SB, 1999. Evolution of Arroyos--Incised Channels of the Southwestern United States, en: In Darby, SE, and Simon, A., Eds., *Incised Channels--Process, Forms, Ingeniería y Gestión*. págs. 153–185. <https://mountainscholar.org/handle/10217/89198>
- Erwin, KL, 2009. Los humedales y el cambio climático global: el papel de la restauración de los humedales en un mundo cambiante. *Wetlands Ecol Manage* 17, 71–84.  
<https://doi.org/10.1007/s11273-008-9119-1>
- Fairfax, E., Small, EE, 2018. Uso de sensores remotos para evaluar el impacto de la represa de castores en la evapotranspiración ribereña en un paisaje árido: Evapotranspiración de áreas ribereñas con presas de castores en paisajes áridos. *Ecohidrología* 11, e1993.  
<https://doi.org/10.1002/eco.1993>

- Fairfax, E., Whittle, A., 2020. Smokey the Beaver: los corredores ribereños represados por castores se mantienen verdes durante los incendios forestales en todo el oeste de los Estados Unidos. *Ecol. aplicación* 30. <https://doi.org/10.1002/eap.2225>
- Fandel, C., Callegary, JB, Ferré, TPA, Norman, LM y Scott, CA (2016). Evaluación del efecto de los gaviones en el flujo de agua vertical en un arroyo efímero utilizando cámaras de vida silvestre y sensores de temperatura. 2015 Conferencia Anual de la Sociedad para la Restauración Ecológica - Capítulo Suroeste, Tucson, Ariz.  
[http://chapter.ser.org/southwest/files/2016/02/Fandel\\_Quantifyinginfiltration.pdf](http://chapter.ser.org/southwest/files/2016/02/Fandel_Quantifyinginfiltration.pdf)
- Fandel, CA, 2016. El efecto de la construcción de gaviones en la infiltración en Arroyos Efímeros (Maestría en Ciencias, Hidrología). La Universidad de Arizona, Tucson, Arizona.  
<https://repository.arizona.edu/handle/10150/622852>
- Fish, P. R., & Fish, S. K., 1984. Agricultural Maximization in the Sacred Mountain Basin, Central Arizona. In *Prehistoric Southwestern Agricultural Strategies*, edited by Suzanne K. Fish and Paul R. Fish (pp. 147–159). Arizona State University Anthropological Research Papers No. 33.
- Fish, SK, Fish, PR, Varineau, R., Villalpando, E., 2013. En vuelo: imágenes de la arqueología trincheras de Adriel Heisey [Documento WWW]. Una exposición del Museo del Estado de Arizona y el Instituto Nacional de Antropología e Historia de México. URL  
<http://www.statemuseum.arizona.edu/exhibits/heisey/index.shtml>
- Fish, S. K., Fish, P. R., & Villalpando C., M. E. (Eds.). (2007). *Trincheras sites in time, space, and society*. University of Arizona Press.
- Geist, J., Hawkins, SJ, 2016. Recuperación y restauración de hábitats en ecosistemas acuáticos: progreso actual y desafíos futuros: Restauración acuática. *Conservación Acuática: Mar. Freshw. ecosistema* 26, 942–962. <https://doi.org/10.1002/aqc.2702>
- Gellis, A., Hereford, R., Schumm, SA, Hayes, BR, 1991. Evolución del canal y variaciones hidrológicas en la cuenca del río Colorado: factores que influyen en las cargas de sedimentos y sal. *Revista de hidrología* 124, 317–344. [https://doi.org/10.1016/0022-1694\(91\)90022-A](https://doi.org/10.1016/0022-1694(91)90022-A)
- Gellis, AC, 1998. Caracterización y evaluación de la erosión de canales y laderas en la Reserva Indígena Zuni, Nuevo México, 1992-95 (Informe de Investigaciones de Recursos Hídricos No. 97–4292). Servicio Geológico de EE. UU., Denver, CO. <https://doi.org/10.3133/wri974281>
- Gellis, AC, Cheama, A., Lahty, V., Lallo, S., 1995. Evaluación de estructuras de control de cárcavas en la cuenca del río Nutria, reserva de Zuni, Nuevo México. *J Am Water Resources Assoc* 31, 633–646. <https://doi.org/10.1111/j.1752-1688.1995.tb03390.x>
- Gerencia de Restauración Forestal, 2018. Protección, restauración y conservación de suelos forestales: Manual de obras y prácticas, 5.ª edición. edición Comisión Nacional Forestal (CONAFOR), Zapopan, Jalisco, México.
- Geyik, MP, 1986. Gully Control, en: *Watershed Management Field Manual*, FAO Conservation Guide Series. Organización de las Naciones Unidas para la Agricultura y la Alimentación, Roma.  
<http://www.fao.org/docrep/006/ad082e/ad082e00.htm>
- Gibbs, JP, 2000. Wetland Loss and Biodiversity Conservation. *Conservation Biology*, 14(1), 314–317. <https://doi.org/10.1046/j.1523-1739.2000.98608.x>
- Gibson, PP, Olden, JD, 2014. Implicaciones en ecología, gestión y conservación del castor norteamericano (*Castor canadensis*) en arroyos de tierras secas. *Conservación Acuática: Mar. Freshw. ecosistema* 24, 391–409. <https://doi.org/10.1002/aqc.2432>
- Gilbert, S. (2021, December 10). Native Americans' farming practices may help feed a warming world. *The Washington Post*. [https://www.washingtonpost.com/climate-solutions/interactive/2021/native-americans-farming-practices-may-help-feed-warming-world/?itid=hp\\_most-read\\_2](https://www.washingtonpost.com/climate-solutions/interactive/2021/native-americans-farming-practices-may-help-feed-warming-world/?itid=hp_most-read_2)

- Glenn, EP, Scott, RL, Nguyen, U., Nagler, PL, 2015. Proporciones de área amplia de evapotranspiración a precipitación en comunidades de vegetación semiárida dependientes del monzón. *Revista de entornos áridos* 117, 84–95. <https://doi.org/10.1016/j.jaridenv.2015.02.010>
- Goldfarb, B., 2018. *Eager: The Surprising, Secret Life of Beavers and Why They Matter*. Chelsea Green Publishing.
- Gooden, J., Pritzlaff, R., 2021. Restauración de cuencas hidrográficas de tierras áridas con estructuras de detención de rocas: una solución basada en la naturaleza para mitigar la sequía, la erosión, las inundaciones y el carbono atmosférico. Parte delantera. *Reinar. ciencia* 9, 679189. <https://doi.org/10.3389/fenvs.2021.679189>
- Goodrich, DC, Schmugge, TJ, Jackson, TJ, Unkrich, CL, Keefer, TO, Parry, R., Bach, LB, Amer, SA, 1994. Sensibilidad de la simulación de escorrentía al contenido inicial de agua del suelo detectado de forma remota. *Investigación de recursos hídricos* 30, 1393–1405.
- Goodrich, DC, Williams, DG, Unkrich, CL, Hogan, JF, Scott, RL, Hultine, KR, Pool, D., Goes, AL, Miller, S., 2004. Comparación de métodos para estimar la recarga de canales efímeros, Walnut Gulch, cuenca del río San Pedro, Arizona, en: Hogan, JF, Phillips, FM, Scanlon, BR (Eds.), *Water Science and Application*. Unión Geofísica Americana, Washington, DC, págs. 77–99. <https://doi.org/10.1029/009WSA06>
- Graham, S., 1999. El sistema climático de la Tierra se ajusta naturalmente. *Nubes y radiación del Observatorio de la Tierra de la NASA*. <https://earthobservatory.nasa.gov/features/Clouds>
- Graham, S., Parkinson, C., Chahine, M., 2010. El ciclo del agua. *Observatorio de la Tierra de la NASA*. <https://earthobservatory.nasa.gov/features/Water>
- Grimm, NB, Fisher, SG, 1984. Intercambio entre agua intersticial y superficial: Implicaciones para el metabolismo de la corriente y el ciclo de nutrientes. *Hidrobiología* 111, 219–228. <https://doi.org/10.1007/BF00007202>
- Gurnell, AM, 1998. Los efectos hidrogeomorfológicos de la actividad de construcción de presas de castores. *Progreso en geografía física* 22, 167–189.
- Hall, JE, Pollock, MM, Hoh, S., Volk, C., Goldsmith, J., Jordan, CE, 2015. Evaluación de la restauración ribereña de tierras secas con álamos y sauces mediante plantación profunda y protección contra herbívoros. *Ecosfera* 6, art263. <https://doi.org/10.1890/ES15-00296.1>
- Hammersmark, CT, Rains, MC, Mount, JF, 2008. Cuantificación de los efectos hidrológicos de la restauración de arroyos en una pradera montañosa, norte de California, EE. UU. *Río Res. Aplicar* 24, 735–753. <https://doi.org/10.1002/rra.1077>
- Hardie, MA, 2011. Efecto de la humedad del suelo antecedente sobre la infiltración y el flujo preferencial en suelos de contraste de textura (Ph.D.). La Universidad de Tasmania, Facultad de Ciencias Agrícolas, Tasmania, Australia.
- Hardie, MA, Doyle, RB, Cotching, WE, Lisson, S., 2012. Flujo lateral subsuperficial en suelos de contraste de textura (dúplex) y captaciones con roca madre poco profunda. *Ciencias del suelo aplicadas y ambientales* 2012, 1–10. <https://doi.org/10.1155/2012/861358>
- Haynes, CV, 1968. Geochronology of late-Quaternary alluvium, en: En Morrison, RB, y Wright, HE, Eds., *Proceedings VII Congress International Association for Quaternary Research*. Presentado en *Means of Correlation of Quaternary Successions*, University of Utah Press, Salt Lake City, Utah, págs. 591–631. ASIN: B004QQHCFA
- He, M., Dijkstra, FA, Zhang, K., Li, X., Tan, H., Gao, Y., Li, G., 2015. Nitrógeno y fósforo foliar de plantas de desierto templado en respuesta al clima y el suelo disponibilidad de nutrientes. *Informe científico* 4, 6932. <https://doi.org/10.1038/srep06932>
- Heede, BH, DeBano, LF, 1984. Rehabilitación de cárcavas: un proceso de tres etapas en un suelo sódico. *Soil Science Society of America Journal* 48, 1416–1422.



- Heffernan, JB (2008). Los humedales como *Sytaea* estable alternativo en los arroyos del desierto. *Ecología*, 89(5), 1261–1271. <https://doi.org/10.1890/07-0915.1>
- Hendrickson, DA, Minckley, WL, 1985. Ciénegas: comunidades clímax en desaparición del suroeste de Estados Unidos. *Plantas del desierto (EE.UU.)*. <http://agris.fao.org/agris-search/search.do?f=1986/US/US86099.xml;US8603277>
- Hester, ET, Gooseff, MN, 2010. Ir más allá de los bancos: la restauración hiporreica es fundamental para restaurar los servicios ecológicos y las funciones de los arroyos. *Reinar. ciencia Tecnología* 44, 1521-1525. <https://doi.org/10.1021/es902988n>
- Hirmas, DR, Giménez, D., Nemes, A., Kerry, R., Brunsell, NA, Wilson, CJ, 2018. Los cambios inducidos por el clima en la macroporosidad del suelo a escala continental pueden intensificar el ciclo del agua. *Naturaleza* 561, 100–103. <https://doi.org/10.1038/s41586-018-0463-x>
- Hood, GA, Bayley, SE, 2008. El castor (*Castor canadensis*) mitiga los efectos del clima en el área de aguas abiertas en los humedales boreales en el oeste de Canadá. *Conservación biológica* 141, 556–567. <https://doi.org/10.1016/j.biocon.2007.12.003>
- Howard, WA, Griffiths, TM, 1966. Distribución Trinchera en la Sierra Madre Occidental, México. (Documento técnico n.º 66–1). DENVER UNIV CO DEPARTAMENTO DE GEOGRAFÍA. ISBN LCCN: 82199681
- Huning, LS, AghaKouchak, A., 2020. Puntos críticos y características de sequía de nieve global. *Proc Natl Acad Sci USA* 117, 19753–19759. <https://doi.org/10.1073/pnas.1915921117>
- Huntington, TG, 2006. Evidencia de la intensificación del ciclo global del agua: revisión y síntesis. *Revista de hidrología* 319, 83–95. <https://doi.org/10.1016/j.jhydrol.2005.07.003>
- Huryňa, H., Pokorný, J., 2016. El papel del agua y la vegetación en la distribución de la energía solar y el clima local: una revisión. *Folia Geobot* 51, 191–208. <https://doi.org/10.1007/s12224-016-9261-0>
- Instituto Internacional para el Desarrollo Sostenible (IISD). (2021, 21 de octubre). El uso de la naturaleza en proyectos de infraestructura podría ahorrar USD 248 000 millones al año: estudio. <https://www.iisd.org/articulos/nature-based-infrastructure>
- Jacoby, R., Peukert, M., Succurro, A., Koprivova, A., Kopriva, S., 2017. El papel de los microorganismos del suelo en la nutrición mineral vegetal: conocimientos actuales y direcciones futuras. *Parte delantera. ciencia de las plantas* 8, 1617. <https://doi.org/10.3389/fpls.2017.01617>
- Jehne, W., 2017. Regenerar la Tierra; La extracción práctica de 20 mil millones de toneladas de carbono de regreso a los suelos anualmente, para rehidratar biosistemas y climas fríos de manera segura. *Suelos Saludables Australia*. <https://www.youtube.com/watch?v=K4ygsdHJjdl>
- Jehne, W., 2016. Restauración de los ciclos del agua para enfriar naturalmente los climas y revertir el calentamiento global. <https://static1.squarespace.com/static/5ddf9264eedec809735a9b65/t/5f6c1801cfee7759ad7e8992/1600919591324/Regenerate-Earth-Paper-Walter-Jehne.pdf>
- Jia, L., Xu, G., Huang, M., Li, Z., Li, P., Zhang, Z., Wang, B., Zhang, Y., Zhang, J. y Cheng, Y. (2020). Efectos del desarrollo de la Ciudad Esponja sobre la humedad del suelo y la calidad del agua en una ciudad típica en la meseta de Loess en China. *Fronteras en Ciencias de la Tierra*, 8, 125. <https://doi.org/10.3389/feart.2020.00125>
- Jia, L., Zheng, C., Hu, GC, Menenti, M., 2018. Evapotranspiración, en: Detección remota integral. Elsevier, págs. 25–50. <https://doi.org/10.1016/B978-0-12-409548-9.10353-7>
- Johnston, CA, 2014. Efectos del estancamiento de castores sobre el almacenamiento de carbono en los suelos. *Geoderma* 213, 371–378. <https://doi.org/10.1016/j.geoderma.2013.08.025>
- Jones, KW, Cannon, JB, Saavedra, FA, Kampf, SK, Addington, RN, Cheng, AS, MacDonald, LH, Wilson, C., Wolk, B., 2017. Retorno de la inversión de tratamientos de combustible para reducir incendios forestales severos y erosión en un programa de inversión en cuencas hidrográficas en Colorado. *Revista de Gestión Ambiental* 198, 66–77. <https://doi.org/10.1016/j.jenvman.2017.05.023>

- Karlstrom, ET, Karlstrom, TNV, 1986. Estratigrafía y suelos aluviales del Cuaternario tardío de las áreas de Black Mesa - Little Colorado River, norte de Arizona, en: In Nations, JD, Conway, CM y Swann, GA, Eds., *Geology of Arizona central y norte*. Presentado en la Sociedad Geológica de América, Reunión de la Sección de las Montañas Rocosas, Field Trip Guidebook: Flagstaff, Universidad del Norte de Arizona, Departamento de Geología, Flagstaff, Ariz., págs. 71–92.  
<https://naturalclimatechange.org/frequency-of-natural-climate-change/1986-karlstrom-and-karlstrom-late-quadernary-alluvial-stratigraphy-black-mesa-az-gsa-guidebook/>
- Khresat, S., Rawajfih, Z., Buck, B., Monger, H., 2004. Características geomórficas y formación del suelo de tierras áridas en el noreste de Jordania. *Archivos de Agronomía y Ciencias del Suelo* 50, 607–615. <https://doi.org/10.1080/03650340400005572>
- Krauss, KW, Noe, GB, Duberstein, JA, Conner, WH, Stagg, CL, Cormier, N., Jones, MC, Bernhardt, CE, Graeme Lockaby, B., From, AS, Doyle, TW, Day, RH, Ensign, SH, Pierfelice, KN, Hupp, CR, Chow, AT, Whitbeck, JL, 2018. El papel del estuario de la marea superior en el flujo y almacenamiento de carbono azul en los humedales. *Ciclos biogeoquímicos globales* 32, 817–839.  
<https://doi.org/10.1029/2018GB005897>
- Kutílek, M., 2004. Propiedades hidráulicas del suelo en relación con la estructura del suelo. *Investigación de suelos y labranza* 79, 175–184. <https://doi.org/10.1016/j.still.2004.07.006>
- Lal, R., 2020. El nexa entre la salud humana y el suelo. Taylor y Francis/CRC, Boca Ratón, FL, 335.
- Lal, R., 2021. Destino del carbono del suelo transportado por procesos erosivos. *Ciencias Aplicadas* 12, 48. <https://doi.org/10.3390/app12010048>
- Lal, R., 2019a. Base conceptual de la gestión del carbono del suelo: inspirada en la naturaleza e impulsada por la ciencia. *Revista de Conservación de Suelos y Aguas* 74, 29A-34A.  
<https://doi.org/10.2489/jswc.74.2.29A>
- Lal, R., 2019b. Ciclo de carbono en las tierras secas globales. *Curr Clim Change Rep* 5, 221–232.  
<https://doi.org/10.1007/s40641-019-00132-z>
- Lal, R., 2018. Profundizando: una perspectiva holística de los factores que afectan el secuestro de carbono orgánico del suelo en los agroecosistemas. *Cambio global Biol* 24, 3285–3301.  
<https://doi.org/10.1111/gcb.14054>
- Lal, R., 2015. Restauración de la calidad del suelo para mitigar la degradación del suelo. *Sostenibilidad* 7, 5875–5895. <https://doi.org/10.3390/su7055875>
- Lal, R., 2014. Conservación de suelos y servicios ecosistémicos. *Investigación Internacional de Conservación de Suelos y Aguas* 2, 36–47. [https://doi.org/10.1016/S2095-6339\(15\)30021-6](https://doi.org/10.1016/S2095-6339(15)30021-6)
- Lal, R., 2010. Gestión de suelos y ecosistemas para mitigar las emisiones de carbono antropogénicas y promover la seguridad alimentaria mundial. *Biociencia* 60, 708–721.  
<https://doi.org/10.1525/bio.2010.60.9.8>
- Lal, R., 2008. Secuestro de carbono. *Transacciones filosóficas de la Royal Society B: Ciencias biológicas* 363, 815–830. <https://doi.org/10.1098/rstb.2007.2185>
- Lal, R., 2004a. Secuestro de carbono en ecosistemas de tierras secas. *Gestión Ambiental* 33, 528–544.  
<https://doi.org/10.1007/s00267-003-9110-9>
- Lal, R., 2004b. Impactos del secuestro de carbono en el suelo sobre el cambio climático global y la seguridad alimentaria. *Ciencia* 304, 1623–1627. <https://doi.org/10.1126/science.1097396>
- Lal, R., 2003. Potencial global del secuestro de carbono del suelo para mitigar el efecto invernadero. *Critical Reviews in Plant Sciences* 22, 151–184. <https://doi.org/10.1080/713610854>
- Lal, R., 2002. Secuestro de carbono en ecosistemas de tierras secas de Asia Occidental y África del Norte. *Degradación y desarrollo de la tierra* 13, 45–59. <https://doi.org/10.1002/ldr.477>
- Lal, R., 2001. Potencial del control de la desertificación para secuestrar carbono y mitigar el efecto invernadero. *Cambio Climático* 51, 35–72. <https://doi.org/10.1023/A:1017529816140>

- Lal, R., Bouma, J., Brevik, E., Dawson, L., Field, DJ, Glaser, B., Hatano, R., Hartemink, AE, Kosaki, T., Lascelles, B., Monger, C., Muggler, C., Ndzana, GM, Norra, S., Pan, X., Paradelo, R., Reyes-Sánchez, LB, Sandén, T., Singh, BR, Spiegel, H., Yanai, J., Zhang, J., 2021. Suelos y objetivos de desarrollo sostenible de las Naciones Unidas: una perspectiva de la Unión Internacional de Ciencias del Suelo. *Geoderma Regional* 25, e00398. <https://doi.org/10.1016/j.geodrs.2021.e00398>
- Lal, R., Follett, RF, Kimble, JM, 2003. Lograr el secuestro de carbono en el suelo en los Estados Unidos: un desafío para los responsables de la formulación de políticas. *Ciencia del suelo* 168, 827–845. <https://doi.org/10.1097/01.ss.0000106407.84926.6b>
- Lane, CR, Leibowitz, SG, Autrey, BC, LeDuc, SD, Alexander, LC, 2018. Funciones hidrológicas, físicas y químicas y conectividad de humedales no inundables a aguas abajo: una revisión. *J Am Water Resour Assoc* 54, 346–371. <https://doi.org/10.1111/1752-1688.12633>
- Laurel, D., Wohl, E., 2019. La persistencia de la heterogeneidad geomórfica inducida por castores y el stock de carbono orgánico en los corredores fluviales. *Oleaje de la Tierra. Proceso. Accidentes geográficos* 44, 342–353. <https://doi.org/10.1002/esp.4486>
- Lazar, J. G., Addy, K., Gold, A. J., Groffman, P. M., McKinney, R. A., & Kellogg, D. Q. (2015). Beaver Ponds: Resurgent Nitrogen Sinks for Rural Watersheds in the Northeastern United States. *Journal of Environmental Quality*, 44(5), 1684–1693. <https://doi.org/10.2134/jeq2014.12.0540>
- Lehman, OR, Ahuja, LR, 1985. Interflujo de agua y químico trazador en terrenos inclinados con caras de filtración expuestas. *Revista de hidrología* 76, 307–317. [https://doi.org/10.1016/0022-1694\(85\)90139-8](https://doi.org/10.1016/0022-1694(85)90139-8)
- Leopold, A., 1937. Conservacionista en México. *Bosques americanos* 43, 118–119.
- Leopold, LB, 1951. Frecuencia de lluvia: un aspecto de la variación climática. *Trans. AGU* 32, 347. <https://doi.org/10.1029/TR032i003p00347>
- Limpert, KE, Carnell, PE, Trevathan-Tackett, SM, Macreadie, PI, 2020. Reducción de emisiones de humedales degradados de llanuras aluviales. Parte delantera. *Reinar. ciencia* 8, 8. <https://doi.org/10.3389/fenvs.2020.00008>
- Macfarlane, WW, Wheaton, JM, Bouwes, N., Jensen, ML, Gilbert, JT, Hough-Snee, N., Shivik, JA, 2017. Modelado de la capacidad de los paisajes fluviales para soportar las presas de castores. *Geomorfología* 277, 72–99. <https://doi.org/10.1016/j.geomorph.2015.11.019>
- Martin, JT, Pederson, GT, Woodhouse, CA, Cook, ER, McCabe, GJ, Anchukaitis, KJ, Wise, EK, Erger, PJ, Dolan, L., McGuire, M., Gangopadhyay, S., Chase, KJ, Littell, JS, Gray, ST, St. George, S., Friedman, JM, Sauchyn, DJ, St-Jacques, J.-M., King, J., 2020. El aumento de la severidad de la sequía rastrea el calentamiento en los Estados Unidos 'cuenca de río más grande. *Proc Natl Acad Sci USA* 117, 11328–11336. <https://doi.org/10.1073/pnas.1916208117>
- Martyn, TE, Barberán, A., Blankinship, JC, Miller, M., Yang, B., Kline, A., & Gornish, ES (2022). Las estructuras rocosas mejoran el establecimiento de plántulas, la captación de hojarasca, la riqueza de hongos y la humedad del suelo durante el primer año después de la instalación. *Gestión Ambiental*. <https://doi.org/10.1007/s00267-022-01651-6>
- Miller, OL, Miller, MP, Longley, PC, Alder, JR, Bearup, LA, Pruitt, T., Jones, DK, Putman, AL, Rumsey, CA, McKinney, T., 2021. ¿Cómo responderá el caudal base al cambio climático? cambio en la cuenca superior del río Colorado? *Geophys Res Lett*. <https://doi.org/10.1029/2021GL095085>
- Minckley, R., 2013. Trayectoria y tasa de respuesta de la vegetación del desierto después de la eliminación del ganado, en Gottfried, Gerald J.; Ffolliott, Peter F.; Gebow, Brooke S.; Eskew, Carril G.; Collins, Loa C., (Ed.s). *Fusión de la ciencia y la gestión en un mundo que cambia rápidamente: biodiversidad y gestión del archipiélago de Madrean III y 7.ª Conferencia sobre investigación y gestión de recursos en los desiertos del suroeste*, Actas del Servicio Forestal del USDA RMRS-P-67. <https://www.nrs.fs.fed.us/pubs/43871>

- Minckley, TA, Brunelle, A. y Turner, DS, 2013. Marco paleoambiental para comprender el desarrollo, la estabilidad y los cambios de estado de Ciénegas en los desiertos americanos. En Gottfried, Gerald J.; Ffolliott, Peter F.; Gebow, Brooke S.; Eskew, Carril G.; Collins, Loa C., (Ed.s) *Fusión de la ciencia y la gestión en un mundo que cambia rápidamente: biodiversidad y gestión del archipiélago de Madrean III y 7.ª Conferencia sobre investigación y gestión de recursos en los desiertos del sudoeste*, 77–83. <https://www.nrs.fs.fed.us/pubs/43871> Moritsch, MM, Young, M., Carnell, P., Macreadie, PI, Lovelock, C., Nicholson, E., Raimondi, PT, Boda, LM, Ierodiaconou, D., 2021. Estimación del secuestro de carbono azul en escenarios de gestión costera. *Ciencia del Medio Ambiente Total* 777, 145962. <https://doi.org/10.1016/j.scitotenv.2021.145962>
- Nahlik, AM, Fennessy, MS, 2016. Almacenamiento de carbono en humedales de EE. UU. *Nat Commun* 7, 13835. <https://doi.org/10.1038/ncomms13835>
- Naiman, RJ, Johnston, CA, Kelley, JC, 1988. Alteration of North American Streams by Beaver. *Biociencia* 38, 753–762. <https://doi.org/10.2307/1310784>
- Nash, CS, Grant, GE, Charnley, S., Dunham, JB, Gosnell, H., Hausner, MB, Pilliod, DS, Taylor, JD, 2021. Grandes expectativas: deconstrucción de las vías de proceso subyacentes a la restauración relacionada con los castores. *Biociencia* 71, 249–267. <https://doi.org/10.1093/biosci/biaa165>
- Nesshöver, C., Assmuth, T., Irvine, KN, Rusch, GM, Waylen, KA, Delbaere, B., Haase, D., Jones-Walters, L., Keune, H., Kovacs, E., Krauze, K., Kylvik, M., Rey, F., van Dijk, J., Vistad, OI, Wilkinson, ME, Wittmer, H., 2017. La ciencia, la política y la práctica de las soluciones basadas en la naturaleza: una perspectiva interdisciplinaria. *Ciencia del Medio Ambiente Total* 579, 1215–1227. <https://doi.org/10.1016/j.scitotenv.2016.11.106>
- Norman, LM (2022). Comentario: Restauración de cuencas hidrográficas de tierras secas con estructuras de detención de rocas: una solución basada en la naturaleza para mitigar la sequía, la erosión, las inundaciones y el carbono atmosférico. *Fronteras en Ciencias Ambientales*, 10. <https://www.frontiersin.org/article/10.3389/fenvs.2022.853684>
- Norman, LM (2021a, 25 de marzo). El campo de los sueños de un jaguar: si lo construyes, vendrán (y otras lecciones de la frontera entre EE. UU. y México). Serie de conferencias públicas vespertinas del USGS, Menlo Park, CA, EE. UU. <https://www.usgs.gov/media/videos/pubtalk-32021-a-jaguars-field-dreams>
- Norman, LM (2021b, 17 de junio). Cuencas hidrográficas internacionales que hacen frente a los peligros climáticos; Soluciones Twin-City en Ambos Nogales y San Diego–Tijuana. Seminario web Brown Bag - Día Mundial de Lucha contra la Desertificación y la Sequía, Centro de Investigación de Recursos Hídricos de la Universidad de Arizona, Tucson, AZ. <https://arizona.app.box.com/s/597xsyavqspzgbp4t9sclgba8unpa9bz>
- Norman, LM, 2020. Servicios ecosistémicos de restauración ribereña: una revisión de las estructuras de detención de rocas en la ecorregión del archipiélago de Madrean. *Investigación de aire, suelo y agua* 13, 117862212094633. <https://doi.org/10.1177/1178622120946337>
- Norman, LM, Brinkerhoff, F., Gwilliam, E., Guertin, DP, Callegary, J., Goodrich, DC, Nagler, PL, Gray, F., 2016. Respuesta hidrológica de arroyos restaurados con presas de contención en las montañas Chiricahua, Arizona *Río Res. Aplicar* 32, 519–527. <https://doi.org/10.1002/rra.2895>
- Norman, LM, Callegary, J., Lacher, L., Wilson, N., Fandel, C., Forbes, B., Swetnam, T., 2019. Modelado de los impactos de la restauración ribereña en el ciclo hidrológico en Babacomari Ranch, SE Arizona, Estados Unidos. *Agua* 11, 381. <https://doi.org/10.3390/w11020381>
- Norman, LM, Girard, MM, Pulliam, HR, Villarreal, ML, Clark, VA, Flesch, AD, Petrakis, RE, Leibowitz, J., Tosline, DJ, Vaughn, K., Wagner, T., Weaver, C., Hare, T., Pérez, JM, López Bujanda, OE, Austin, JT, Campbell, CF, Callegary, JB, Wilson, NR, Conn, JA, Sisk, T. y Nabhan, GP (2022). Una visión compartida para mejorar la resiliencia ecológica en las zonas fronterizas de EE. UU. y México: The Sky Island Restoration Collaborative. *Revista Sociedad (SERNews)*, 36, 19–27.

- [https://cdn.ymaws.com/www.ser.org/resource/resmgr/sernews/sernews\\_36-1/sernews\\_vol36\\_iss1\\_vf.pdf](https://cdn.ymaws.com/www.ser.org/resource/resmgr/sernews/sernews_36-1/sernews_vol36_iss1_vf.pdf)
- Norman, LM, Huth, H., Levick, L., Shea Burns, I., Phillip Guertin, D., Lara-Valencia, F., Semmens, D., 2010a. Concientización sobre peligros de inundación y modelado hidrológico en Ambos Nogales, frontera entre Estados Unidos y México. *Revista de Gestión de Riesgos de Inundaciones* 3, 151–165. <https://doi.org/10.1111/j.1753-318X.2010.01066.x>
- Norman, LM, Levick, LR, Guertin, DP, Callegary, JB, Quintanar Guadarrama, J., Zulema Gil Anaya, C., Prichard, A., Gray, F., Castellanos, E., Tepezano, E., Huth, H., Vandervoet, P., Rodriguez, S., Nunez, J., Atwood, D., Patricio Olivero Granillo, G., Octavio Gastelum Ceballos, F., 2010b. Estudio de detención de inundaciones en Nogales. Informe de archivo abierto del Servicio Geológico de EE. UU. 2010–1262, 112. <https://doi.org/10.3133/ofr20101262>
- Norman, LM, Niraula, R., 2016. Modelo de análisis de los impactos de las presas de contención en los presupuestos de agua y sedimentos a largo plazo en el sureste de Arizona, EE. UU. *Ecohidrología e Hidrobiología* 16, 125–137. <https://doi.org/10.1016/j.ecohyd.2015.12.001>
- Norman, LM, Pulliam, HR, Girard, MM, Buckley, SM, Misztal, L., Seibert, D., Campbell, C., Callegary, JB, Tosline, DJ, Wilson, NR, Hodges, D., Conn, JA, Austin-Clark, AV, 2021a. Editorial: Combinando la ciencia y la práctica de la ecología de la restauración: estudios de caso de una colaboración binacional de restauración de base en la ecorregión del archipiélago de Madrean (2014–2019). *Investigación de aire, suelo y agua* 14, 117862212110094. <https://doi.org/10.1177/11786221211009478>
- Norman, LM, Ruddell, BL, Tosline, DJ, Fell, MK, Greimann, BP, Cederberg, JR, 2021b. Desarrollo de resiliencia climática en tierras áridas utilizando estructuras de detención de rocas como infraestructura verde. *Sostenibilidad* 13, 11268. <https://doi.org/10.3390/su132011268>
- Norman, LM, Sankey, JB, Dean, D., Caster, J., DeLong, S., DeLong, W., Pelletier, JD, 2017. Cuantificación del cambio geomórfico en sitios de restauración de arroyos efímeros utilizando un enfoque de modelo acoplado. *Geomorfología* 283, 1–16. <https://doi.org/10.1016/j.geomorph.2017.01.017>
- Norman, LM, Villarreal, ML, Pulliam, HR, Minckley, R., Gass, L., Tolle, C., Coe, M., 2014. Análisis de detección remota de la respuesta de la vegetación ribereña a la restauración de pantanos del desierto en el altiplano mexicano. *Ingeniería ecológica* 70C, 241–254. <https://doi.org/10.1016/j.ecoleng.2014.05.012>
- Ohlson, K., 2014. *El suelo nos salvará: cómo los científicos, agricultores y amantes de la comida están curando el suelo para salvar el planeta*. Rodale, Nueva York, NY. ISBN: 978-1-60961-554-3
- Ouyang, X., & Lee, S. Y., 2020. Improved estimates on global carbon stock and carbon pools in tidal wetlands. *Nature Communications*, 11(1), 317. <https://doi.org/10.1038/s41467-019-14120-2>
- Ouyang, W., Wang, P., Liu, S., Hao, X., Wu, Z., Cui, X., Jin, R., Zhu, W. y Lin, C. 2021. La lluvia estimula grandes emisión de dióxido de carbono durante la temporada de crecimiento en una cuenca de humedal forestal. *Revista de hidrología*, 602, 126892. <https://doi.org/10.1016/j.jhydrol.2021.126892>
- Overpeck, JT, 2021. Cueste lo que cueste, Estados Unidos necesita una acción climática audaz ahora. La colina. <https://thehill.com/opinion/energy-environment/574310-whatever-it-take-the-united-states-needs-bold-climate-action-now/?msclkid=305fb927d0b311ecb19707f1b717e3ea>
- Overpeck, JT, Udall, B., 2020. El cambio climático y la aridez de América del Norte. *Proc Natl Acad Sci USA* 117, 11856–11858. <https://doi.org/10.1073/pnas.2006323117>
- Palmer, M., Allan, JD, Meyer, J., Bernhardt, ES, 2007. Restauración de ríos en el siglo XXI: datos y conocimiento experiencial para informar esfuerzos futuros. *Ecología de la Restauración* 15, 472–481. <https://doi.org/10.1111/j.1526-100X.2007.00243.x>

- Patton, PC, Schumm, SA, 1981. Procesos de corrientes efímeras: implicaciones para los estudios de rellenos de valles cuaternarios. *Cuat. res.* 15, 24–43. [https://doi.org/10.1016/0033-5894\(81\)90112-5](https://doi.org/10.1016/0033-5894(81)90112-5)
- Pfaeffle, T., Moore, MA, Cravens, AE, McEvoy, J. y Bamzai-Dodson, A., 2022. Aguas turbias: formas divergentes en que científicos, profesionales y terratenientes evalúan el mimetismo del castor. *Ecología y Sociedad*, 27(1), art41. <https://doi.org/10.5751/ES-13006-270141>
- Pilliod, DS, Rohde, AT, Charnley, S., Davee, RR, Dunham, JB, Gosnell, H., Grant, GE, Hausner, MB, Huntington, JL, Nash, C., 2018. Encuesta de relacionados con Beaver Prácticas de restauración en arroyos de pastizales del oeste de los EE. UU. *Gestión Ambiental* 61, 58–68. <https://doi.org/10.1007/s00267-017-0957-6>
- Pimm, SL, 1984. La complejidad y estabilidad de los ecosistemas. *Naturaleza* 307, 321–326. <https://doi.org/10.1038/307321a0>
- Poff, NL, Allan, JD, Bain, MB, Karr, JR, Prestegard, KL, Richter, BD, Sparks, RE, Stromberg, JC, 1997. El régimen de flujo natural. *Biociencia* 47, 769–784. <https://doi.org/10.2307/1313099>
- Pollock, MM, Beechie, TJ, Wheaton, JM, Jordan, CE, Bouwes, N., Weber, N., Volk, C., 2014. Uso de presas de castores para restaurar ecosistemas de arroyos incisos. *Biociencia* 64, 279–290. <https://doi.org/10.1093/biosci/biu036>
- Pollock, MM, Heim, M., Werner, D., 2003. Efectos hidrológicos y geomórficos de las presas de castores y su influencia en los peces. Presentado en el Simposio de la Sociedad Americana de Pesca.
- Pollock, MM, Lewallen, GM, Woodruff, K., Jordan, C., Castro, JM (Eds.), 2018. *The Beaver Restoration Guidebook: Working with Beaver to Restore Streams, Wetlands, and Floodplains, Version 2.01.* edición Servicio de Pesca y Vida Silvestre de los Estados Unidos, Portland, Oregón. <http://www.fws.gov/oregonfwo/ToolsForLandowners/RiverScience/Beaver.asp>
- Ponce, VM, Lindquist, DS, 1990. Manejo del aumento del flujo base: una revisión. *Boletín de Recursos Hídricos* 259–268.
- Puttock, A., Graham, HA, Carless, D., Brazier, RE, 2018. Almacenamiento de sedimentos y nutrientes en un humedal diseñado por castores: Almacenamiento de sedimentos y nutrientes en un humedal diseñado por castores. *Oleaje de la Tierra. Proceso. Accidentes geográficos* 43, 2358–2370. <https://doi.org/10.1002/esp.4398>
- Puttock, A., Graham, HA, Cunliffe, AM, Elliott, M., Brazier, RE, 2017. La actividad del castor euroasiático aumenta el almacenamiento de agua, atenúa el flujo y mitiga la contaminación difusa de los pastizales manejados intensivamente. *Ciencia del Medio Ambiente Total* 576, 430–443. <https://doi.org/10.1016/j.scitotenv.2016.10.122>
- Randall, B., 2021. Las estructuras sencillas construidas a mano pueden ayudar a los arroyos a sobrevivir a los incendios forestales y las sequías La restauración de baja tecnología gana popularidad como una solución eficaz para las vías fluviales en crisis en el oeste americano. *Noticias científicas, Ecosistemas*. <https://www.sciencenews.org/article/stream-survival-beaver-dam-simple-structures-wildfires-drought>
- Rango, A., Tartowski, SL, Laliberte, A., Wainwright, J., Parsons, A., 2006. Islas de productividad biótica mejorada hidrológicamente en ecosistemas áridos naturales y gestionados. *Revista de entornos áridos* 65, 235–252. <https://doi.org/10.1016/j.jaridenv.2005.09.002>
- Reinert, JH, Albertson, LK, Junker, JR, 2022. Influencia de las estructuras biomiméticas en la función del ecosistema en un arroyo inciso de las Montañas Rocosas. *Ecosfera* 13. <https://doi.org/10.1002/ecs2.3897>
- Riebeek, H., 2011. El ciclo del carbono. Observatorio de la Tierra de la NASA. <https://earthobservatory.nasa.gov/features/CarbonCycle>
- Robinne, F., Hallema, D. W., Bladon, K. D., Flannigan, M. D., Boisramé, G., Bréthaut, C. M., Doerr, S. H., Di Baldassarre, G., Gallagher, L. A., Hohner, A. K., Khan, S. J., Kinoshita, A. M., Mordecai, R., Nunes,

- J. P., Nyman, P., Santín, C., Sheridan, G., Stoof, C. R., Thompson, M. P., ... Wei, Y. (2021). Scientists' warning on extreme wildfire risks to water supply. *Hydrological Processes*, 35(5). <https://doi.org/10.1002/hyp.14086>
- Rosgen, DL, 1997. Un enfoque geomorfológico para la restauración de ríos incisos, en: *Actas de la Conferencia sobre Manejo de Paisajes Perturbados por la Incisión del Canal*. ISBN 0-937099-05-8.
- Sabo, J. L., Sponseller, R., Dixon, M., Gade, K., Harms, T., Heffernan, J., Jani, A., Katz, G., Soykan, C., Watts, J., & Welter, J. (2005). RIPARIAN ZONES INCREASE REGIONAL SPECIES RICHNESS BY HARBORING DIFFERENT, NOT MORE, SPECIES. *Ecology*, 86(1), 56–62. <https://doi.org/10.1890/04-0668>
- Sahani, J., Kumar, P., Debele, S., Spyrou, C., Loupis, M., Aragão, L., Porcù, F., Shah, MAR, Di Sabatino, S., 2019. Hidrometeorológica métodos de evaluación y gestión de riesgos mediante soluciones basadas en la naturaleza. *Ciencia del Medio Ambiente Total* 696, 133936. <https://doi.org/10.1016/j.scitotenv.2019.133936>
- Scamardo, J., Wohl, E., 2020. Almacenamiento de sedimentos y respuesta de aguas subterráneas poco profundas a análogos de presas de castores en Colorado Front Range, EE. UU. *Aplicación River Res* 36, 398–409. <https://doi.org/10.1002/rra.3592>
- Scamardo, JE, Marshall, S. y Wohl, E., 2022. Estimación de la pérdida generalizada de presas de castores: disminución del hábitat y pérdida de almacenamiento superficial a escala regional. *Ecosfera*, 13 (3). <https://doi.org/10.1002/ecs2.3962>
- Schreiner-McGraw, AP, Ajami, H., 2021. Respuesta retardada del agua subterránea a sequías meteorológicas de varios años en ausencia de gestión antropogénica. *Revista de hidrología* 603, 126917. <https://doi.org/10.1016/j.jhydrol.2021.126917>
- Schumm, SA, 1985. Evaluación geomórfica de canales incisos. Departamento de Agricultura y Abastecimiento de Agua, República de Sudáfrica.
- Scott, DN, Wohl, E., Yochum, SE, 2019. Modelo de evaluación y base de datos de la dinámica de la mermelada de madera (WoodDAM): un marco para medir y comprender las características y la dinámica de la mermelada de madera. *Aplicación River Res* 35, 1466–1477. <https://doi.org/10.1002/rra.3481>
- Seager, R., Ting, M., Held, I., Kushnir, Y., Lu, J., Vecchi, G., Huang, H.-P., Harnik, N., Leetmaa, A., Lau, N.-C., Li, C., Velez, J., Naik, N., 2007. Proyecciones modelo de una transición inminente a un clima más árido en el suroeste de América del Norte. *Ciencia* 316, 1181–1184. <https://doi.org/10.1126/science.1139601>
- Siler, N., Roe, GH, Armour, KC, Feldl, N., 2019. Revisión de la perspectiva del flujo de energía superficial sobre la sensibilidad de la precipitación global al cambio climático. *Clim Dyn* 52, 3983–3995. <https://doi.org/10.1007/s00382-018-4359-0>
- Silverman, NL, Allred, BW, Donnelly, JP, Chapman, TB, Maestas, JD, Wheaton, JM, White, J., Naugle, DE, 2019. La restauración de praderas húmedas y ribereñas de baja tecnología aumenta la productividad y la resiliencia de la vegetación en zonas semiáridas pastizales: la restauración de baja tecnología aumenta la productividad de la vegetación. *Restaurar Ecol* 27, 269–278. <https://doi.org/10.1111/rec.12869>
- Skidmore, P. y Wheaton, J., 2022. Paisajes fluviales como infraestructura natural: Enfrentando los desafíos de la adaptación climática y la restauración de ecosistemas. *Antropoceno*, 38, 100334. <https://doi.org/10.1016/j.ancene.2022.100334>
- Smettem, KRJ, Chittleborough, DJ, Richards, BG, Leaney, FW, 1991. La influencia de los macroporos en la generación de escorrentía de un suelo de ladera con una clase textural contrastante. *Revista de hidrología* 122, 235–251. [https://doi.org/10.1016/0022-1694\(91\)90180-P](https://doi.org/10.1016/0022-1694(91)90180-P)
- Smith, DD, Wischmeier, WH, 1962. Rainfall Erosion, en: *Avances en Agronomía*. Elsevier, págs. 109–148. [https://doi.org/10.1016/S0065-2113\(08\)60437-X](https://doi.org/10.1016/S0065-2113(08)60437-X)



- Stavi, I., Thevs, N., Priori, S., 2021. Salinidad y sodicidad del suelo en tierras secas: una revisión de las causas, los efectos, el seguimiento y las medidas de restauración. Parte delantera. *Reinar. ciencia* 9, 712831. <https://doi.org/10.3389/fenvs.2021.712831>
- Stockdale, CA, McLoughlin, N., Flannigan, M., Macdonald, SE, 2019. ¿Podría la restauración de un paisaje a una condición de vegetación histórica preeuropea reducir la probabilidad de quema? *Ecosfera* 10, e02584. <https://doi.org/10.1002/ecs2.2584>
- Stockmann, U., Adams, MA, Crawford, JW, Field, DJ, Henakaarchchi, N., Jenkins, M., Minasny, B., McBratney, AB, de Remy de Courcelles, V., Singh, K., Wheeler, I., Abbott, L., Angers, DA, Baldock, J., Bird, M., Brookes, PC, Chenu, C., Jastrow, JD, Lal, R., Lehmann, J., O, AG, Parton, WJ, Whitehead, D., Zimmermann, M., 2013. Los conocimientos, las incógnitas conocidas y las incógnitas del secuestro del carbono orgánico del suelo. *Ecosistemas y medio ambiente* 164, 80–99.
- Stromberg, JC, Tiller, R. y Richter, B., 1996. Efectos de la disminución de las aguas subterráneas en la vegetación ribereña de las regiones semiáridas: San Pedro, Arizona. *Aplicaciones ecológicas*, 6 (1), 113–131. <https://doi.org/10.2307/2269558>
- Sutfin, NA, Wohl, E., 2017. Retención sustancial de carbono orgánico en el suelo a lo largo de las llanuras aluviales de los arroyos de montaña. *Revista de investigación geofísica: superficie de la Tierra* 122, 1325–1338. <https://doi.org/10.1002/2016JF004004>
- Tangen, B. A., & Bansal, S. (2020). Soil organic carbon stocks and sequestration rates of inland, freshwater wetlands: Sources of variability and uncertainty. *Science of The Total Environment*, 749, 141444. <https://doi.org/10.1016/j.scitotenv.2020.141444>
- Tchakerian, V., Pease, P., 2015. The Critical Zone in Desert Environments, en: *Desarrollos en los procesos de la superficie terrestre*. Elsevier, págs. 449–472. <https://doi.org/10.1016/B978-0-444-63369-9.00014-8>
- Temmink, RJM, Lamers, LPM, Angelini, C., Bouma, TJ, Fritz, C., van de Koppel, J., Lexmond, R., Rietkerk, M., Silliman, BR, Joosten, H. y van der Heide, T., 2022. Recuperación de retroalimentaciones biogeomórficas de humedales para restaurar los puntos críticos de carbono biótico del mundo. *Ciencia*, 376 (6593), eabn1479. <https://doi.org/10.1126/science.abn1479>
- Tensegrity, S. (Director). (2018). *Beaver Believers*.
- Terando, A., Reidmiller, D., Hostetler, SW, Littel, JS, Beard Jr., TD, Weiskopf, SR, Belnap, J., Plumlee, GS, 2020. Uso de información de modelos climáticos globales para informar la formulación de políticas: el Papel del Servicio Geológico de los Estados Unidos. Informe de archivo abierto del Servicio Geológico de EE. UU., Informe de archivo abierto 2020–1058, 25. <https://doi.org/10.3133/ofr20201058>
- The Nature Conservancy, Grupo de trabajo sobre el clima de Gunnison, 2017. *Resiliencia mejorada de los hábitats ribereños y de praderas húmedas en la cuenca superior de Gunnison, Colorado: Fase II*. (Reporte técnico). Parques y Vida Silvestre de Colorado. <http://www.conservationgateway.org/ConservationByGeography/NorthAmerica/UnitedStates/Colorado/Documents/CPW%20Gunnison%20Final%20Report%206-8-2017%20FINAL.pdf>
- Tosline, DJ, Norman, LM, Greimann, BP, Cederberg, J., Huang, V., Ruddell, BL, 2020. Impacts of Grade Control Structure Installations on Hydrology and Sediment Transport as an Adaptive Management Strategy (Programa de investigación de ciencia y tecnología y Fomento No. ST-2017-1751-01). Oficina de Recuperación, Oficina del Área de Phoenix. <https://data.usbr.gov/catalog/4414/item/6298>
- Trenberth, K., 2011. Cambios en la precipitación con el cambio climático. *Clima Res.* 47, 123–138. <https://doi.org/10.3354/cr00953>
- Tye, S., Pool, J.-R., & Gallardo Lomeli, L. (2022). El potencial de las iniciativas de soluciones basadas en la naturaleza para incorporar y escalar la adaptación climática. Instituto de Recursos Mundiales. <https://doi.org/10.46830/wriwp.21.00036>

- Uhlman, K., Eastoe, C., Guido, Z., Crimmins, MA, Purkey-Deller, A., Eden, S., 2020. Evaluación de la vulnerabilidad de un acuífero a la variabilidad climática a través de la participación comunitaria en Arivaca, Arizona. *Revista de Investigación y Educación Contemporáneas sobre el Agua* 170, 2–18. <https://doi.org/10.1111/j.1936-704X.2020.03337.x>
- Convención Marco de las Naciones Unidas sobre el Cambio Climático—UNFCCC, 2015. Adopción del Acuerdo de París (No. Informe n° FCCC/CP/2015/L.9/Rev.1). <http://unfccc.int/resource/docs/2015/cop21/eng/l09r01.pdf>
- Departamento del Interior de EE. UU., 2021, 6 de noviembre. El secretario Haaland se enfoca en soluciones al cambio climático lideradas por indígenas y basadas en la naturaleza en Glasgow. Presione soltar. <https://www.doi.gov/pressreleases/secretary-haaland-focuses-indigenous-led-nature-based-solutions-climate-change-glasgow?msclkid=743f6d45d15611ecab5ec18e3cf47cc2>
- EPA de EE. UU., 2015. Connectivity of Streams and Wetlands To Downstream Waters: A Review and Synthesis of the Scientific Evidence (Informe final (No. EPA/600/R-14/475F). Agencia de Protección Ambiental de EE. UU., Washington, DC, EE. UU. <https://cfpub.epa.gov/ncea/risk/recordisplay.cfm?deid=296414>
- Vanderhoof, M. y Burt, C. 2018. Aplicación de imágenes de alta resolución para evaluar los cambios inducidos por la restauración en la condición de la corriente, cuenca de cabecera del río Missouri, Montana. *Teledetección*, 10(6), 913. <https://doi.org/10.3390/rs10060913>
- Villarreal, ML, Norman, LM, Yao, EH, Conrad, CR, 2022. Los modelos de probabilidad de incendios forestales calibrados utilizando patrones de ignición humanos y de rayos anteriores pueden informar la mitigación de los peligros hidrológicos posteriores al incendio. *Geomática, peligros naturales y riesgos* 13, 568–590. <https://doi.org/10.1080/19475705.2022.2039787>
- Vyverberg, K., 2010. Una revisión de los procesos y formas de los arroyos en las cuencas hidrográficas de las tierras secas. Departamento de Pesca y Caza de California (CDFG). <https://nrm.dfg.ca.gov/FileHandler.ashx?DocumentID=25779>
- Walter, RC, Merritts, DJ, 2008. Arroyos naturales y el legado de los molinos accionados por agua. *Ciencia* 319, 299–304. <https://doi.org/10.1126/science.1151716>
- Wang, P., Ouyang, W., Wu, Z., Cui, X., Zhu, W., Jin, R. y Lin, C. 2020. Contaminación difusa por nitrógeno en una cuenca dominada por bosques: fuente, transporte y eliminación. *Revista de hidrología*, 585, 124833. <https://doi.org/10.1016/j.jhydrol.2020.124833>
- Webb, RH, Betancourt, JL, Turner, RM, Johnson, RR, 2014. Réquiem para el Santa Cruz: una historia ambiental de un río de Arizona. Prensa de la Universidad de Arizona, Tucson. ISBN: 978-0-8165-3072-4
- Weber, N., Bouwes, N., Pollock, MM, Volk, C., Wheaton, JM, Wathen, G., Wirtz, J., Jordan, CE, 2017. Alteración de la temperatura de la corriente por presas de castores naturales y artificiales. *PLoS ONE* 12, e0176313. <https://doi.org/10.1371/journal.pone.0176313>
- West, NE, Stark, JM, Johnson, DW, Abrams, MM, Wight, JR, Heggem, D., Peck, S., 1994. Efectos del cambio climático en las características edáficas de las tierras áridas y semiáridas del oeste de América del Norte. *Investigación y rehabilitación de suelos áridos* 8, 307–351. <https://doi.org/10.1080/15324989409381408>
- Westbrook, CJ, Cooper, DJ, Baker, BW, 2006. Las presas de castores y las inundaciones de desbordamiento influyen en las interacciones del agua subterránea y el agua superficial de un área ribereña de las Montañas Rocosas: HIDROLOGÍA DE INUNDACIONES DE MONTAÑA Y PRESAS DE CASTOR. *Recurso de agua. Res.* 42. <https://doi.org/10.1029/2005WR004560>
- Westbrook, CJ, Ronnquist, A., Bedard-Haughn, A., 2020. Funcionamiento hidrológico de la secuencia de una presa de castores y la persistencia de una presa regional durante una tormenta extrema. *Procesos hidrológicos* 34, 3726–3737. <https://doi.org/10.1002/hyp.13828>

- Wheaton, JM, Bennett, SN, Bouwes, N., Maestas, JD, Shahverdian, S., 2019. Restauración de paisajes fluviales basada en procesos de baja tecnología: Manual de diseño. Versión 1.0. <https://doi.org/10.13140/RG.2.2.19590.63049/2>
- White, DS, 1990. Relaciones biológicas con los patrones de flujo convectivo dentro de los lechos de los ríos. *Hidrobiología* 196, 149–158.
- Wilson, NR, Norman, LM, 2019. Respuesta de la vegetación a la conservación del paisaje en las Islas del Cielo. *Prensa de plantas de la sociedad de plantas nativas de Arizona* 27–31. <https://aznps.com/the-plant-press/>
- Wilson, NR, Norman, LM, 2018a. Análisis de la recuperación de la vegetación que rodea un humedal restaurado utilizando el índice infrarrojo de diferencia normalizada (NDII) y el índice de vegetación de diferencia normalizada (NDVI). *Revista Internacional de Percepción Remota* 39, 3243–3274. <https://doi.org/10.1080/01431161.2018.1437297>
- Wilson, NR, Norman, LM, 2018b. Data release for analysis of vegetation recovery surrounding a restored wetland using the Normalized Difference Infrared Index (NDII) and Normalized Difference Vegetation Index (NDVI). U.S. Geological Survey Data Release. <https://doi.org/10.5066/F798867T>
- Wilson, N. R., Norman, L. M., Mount, A. C., Bennett, A., & Simpson, A., 2021. Short Term Vegetation Response Study at Watershed Restoration Structures in Southeastern Arizona, 2015—2019. U.S. Geological Survey Data Release. <https://doi.org/10.5066/P9ED403K>
- Wilson, N. R., Norman, L. M., Villarreal, M. L., Gass, L., Tiller, R., & Salywon, A. (2016). Comparison of remote sensing indices for monitoring of desert cienegas. *Arid Land Research and Management*, 1–19. <https://doi.org/10.1080/15324982.2016.1170076>
- Wohl, E., 2021. Efectos heredados de la pérdida de castores en los Estados Unidos continentales. *Reinar. Res. Letón*. 16, 025010. <https://doi.org/10.1088/1748-9326/abd34e>
- Wohl, E., 2020. Dominios de procesos de madera y cargas de madera en llanuras aluviales. *Procesos de la superficie terrestre y accidentes geográficos* 45, 144–156. <https://doi.org/10.1002/esp.4771>
- Wohl, E., 2013. Almacenamiento de carbono a escala de paisaje asociado con presas de castores: ALMACENAMIENTO DE CARBONO Y PRESAS DE CASTOR. *Geofísico. Res. Letón*. 40, 3631–3636. <https://doi.org/10.1002/grl.50710>
- Wohl, E., Angermeier, PL, Bledsoe, B., Kondolf, GM, MacDonnell, L., Merritt, DM, Palmer, MA, Poff, NL, Tarboton, D., 2005. Restauración de ríos: OPINIÓN. *Investigación de recursos hídricos* 41, n/a/a. <https://doi.org/10.1029/2005WR003985>
- Wohl, E., Scott, DN, Yochum, SE, 2019. Manejo de grandes presas de madera y castores en corredores de arroyos (No. RMRS-GTR-404). Departamento de Agricultura de EE. UU., Servicio Forestal, Estación de Investigación de las Montañas Rocosas, Ft. Collins, CO. <https://doi.org/10.2737/RMRS-GTR-404>
- WWAP, U.-W., 2018. Informe de las Naciones Unidas sobre el desarrollo de los recursos hídricos en el mundo 2018: Soluciones para el agua basadas en la naturaleza. UNESCO; Programa Mundial de Evaluación de los Recursos Hídricos de las Naciones Unidas, París, Francia. ISBN: 978-92-3-100264-9
- Yosef, G., Walko, R., Avisar, R., Tatarinov, F., Rotenberg, E., Yakir, D., 2018. La forestación semiárida a gran escala puede mejorar la precipitación y el potencial de secuestro de carbono. *Informe científico* 8, 996. <https://doi.org/10.1038/s41598-018-19265-6>
- Zeedyk, B., 2009. Una introducción a los meandros inducidos: un método para restaurar la estabilidad de los canales de arroyo incisos. [http://quiviracoalition.org/images/pdfs/1905-An\\_Introduction\\_to\\_Induced\\_Meandering.pdf](http://quiviracoalition.org/images/pdfs/1905-An_Introduction_to_Induced_Meandering.pdf).
- Zeedyk, B., Clothier, V., 2009. Deje que el agua haga el trabajo: meandros inducidos, un método en evolución para restaurar canales incisos. Coalición Quivira, Santa Fe, NM. ISBN: 9780970826435

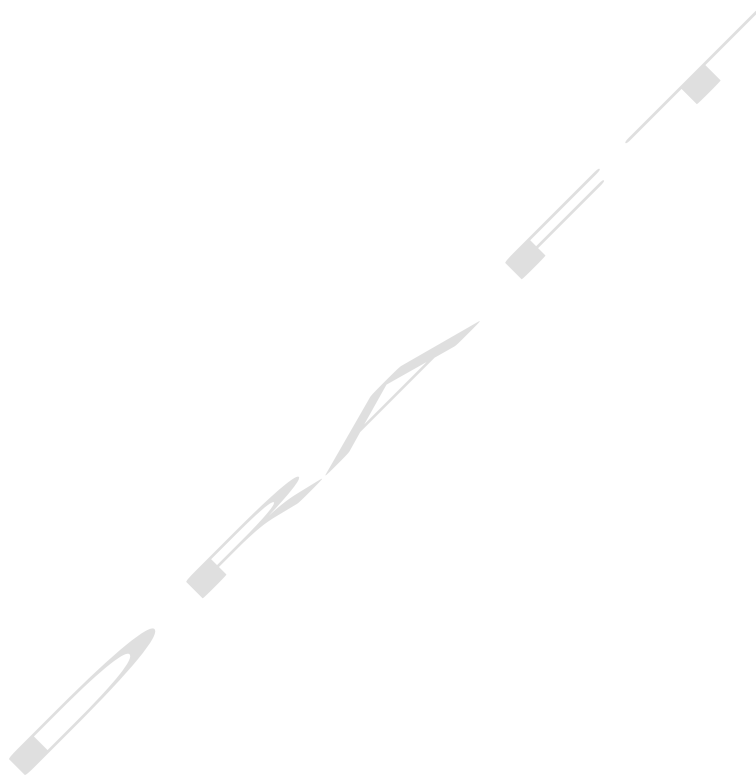

Supplement: mmc2 [file 1-s2.0-S0048969722048379-mmc2.pdf]
